# Supplementary material for: Development of thiazole-appended novel hydrazones as a new class of α-amylase inhibitors with anticancer assets: anin silicoandin vitroapproach
Source: Royal Society of Chemistry journal article supplement (doi:10.1039/d2md00431c), 2023-01-01
Supplement: d2md00431c1.pdf [file d2md00431c1.pdf]

**Development of thiazole appended novel hydrazones as a new class of  $\alpha$ -amylase inhibitors with anticancer assets: An *in silico* and *in vitro* approach**

**Sandhya Chahal<sup>a</sup>, Jyoti Punia<sup>a</sup>, Payal Rani<sup>a</sup>, Rajvir singh<sup>a</sup>, Mayank<sup>b</sup>, Parvin Kumar<sup>c</sup>, Ramesh Kataria<sup>d</sup>, Gaurav Joshi<sup>e\*</sup>, Jayant Sindhu<sup>a\*</sup>**

<sup>a</sup>Department of Chemistry, COBS&H, CCS Haryana Agricultural University, Hisar, India-125004

<sup>b</sup>3IT - Université de Sherbrooke, 3000 Bd de l'Université Immeuble P2, Sherbrooke, QC J1K 0A5, Canada

<sup>c</sup>Department of Chemistry, Kurukshetra University, Kurukshetra, India-136119

<sup>d</sup>Department of Chemistry, Panjab University, Chandigarh, India-160014

<sup>e</sup>Department of Pharmaceutical Sciences, Hemvati Nandan Bahuguna Garhwal (A Central) University, Chauras Campus, Tehri Garhwal - 249161 Uttarakhand, India.

\*Email:- [javantchem@gmail.com](mailto:javantchem@gmail.com); [javantchem1402@hau.ac.in](mailto:javantchem1402@hau.ac.in); [garvpharma29@gmail.com](mailto:garvpharma29@gmail.com)

Table S 1: 2D NMR correlation of *5aa*

| Proton | Chemical shift | Carbon | Chemical shift | Cosy                                        | HMBC                              | HSQC                             | Noesy         |
|--------|----------------|--------|----------------|---------------------------------------------|-----------------------------------|----------------------------------|---------------|
| H17    | 8.59           | C17    | 149.26         | (8.59, 7.38),<br>(8.59, 8.09), (8.59, 7.84) | (8.59, 124.80),<br>(8.59, 137.23) | (8.59, 149.26)                   |               |
| H16    | 7.38           | C16    | 124.80         | (7.38, 8.59), (7.38, 8.09)                  | (7.38, 149.26)                    | (7.38, 124.80)                   |               |
| H15    | 7.84           | C15    | 137.23         | (7.84, 8.09), (7.84, 8.59)                  | (7.84, 154.10)                    | (7.84, 137.23)                   |               |
| H14    | 8.09           | C14    | 120.95         | (8.09, 8.59),<br>(8.09, 7.38), (8.09, 7.84) | (8.09, 124.80)                    | (8.09, 120.95)                   |               |
|        |                | C13    | 154.10         |                                             |                                   |                                  |               |
|        |                | C11    | 144.65         |                                             |                                   |                                  |               |
|        |                | C10    | 154.10         |                                             |                                   |                                  |               |
|        |                | C4     | 125.35         |                                             |                                   |                                  |               |
| H3a    | 7.35           | C3     | 129.35         |                                             | (7.35, 129.35),<br>(7.35, 140.04) |                                  |               |
| H2     | 7.4            | C2     | 119.43         | (7.35, 7.75)                                | (7.4, 119.43)                     |                                  |               |
|        |                | C1     | 140.04         |                                             |                                   |                                  |               |
| H6     | 7.75           | C6     | 119.43         | (7.75, 7.31), (7.75, 7.35)                  | (7.75, 119.43),                   | (7.75, 119.43)                   | (7.75, 10.57) |
| H5     | 7.31           | C5     | 129            | (7.31, 7.75)                                |                                   | (7.31, 129)                      |               |
| H12    | 2.37           | C12    |                |                                             |                                   | (2.37, 149.26 )<br>(2.37, 154.0) | (2.37, 10.41) |
| NH     | 10.57          |        |                |                                             |                                   |                                  | (10.57, 2.37) |
| NH     | 10.44          |        |                |                                             |                                   |                                  | (10.44, 2.37) |

# Supplementary information

$^1\text{H}$  NMR 5a

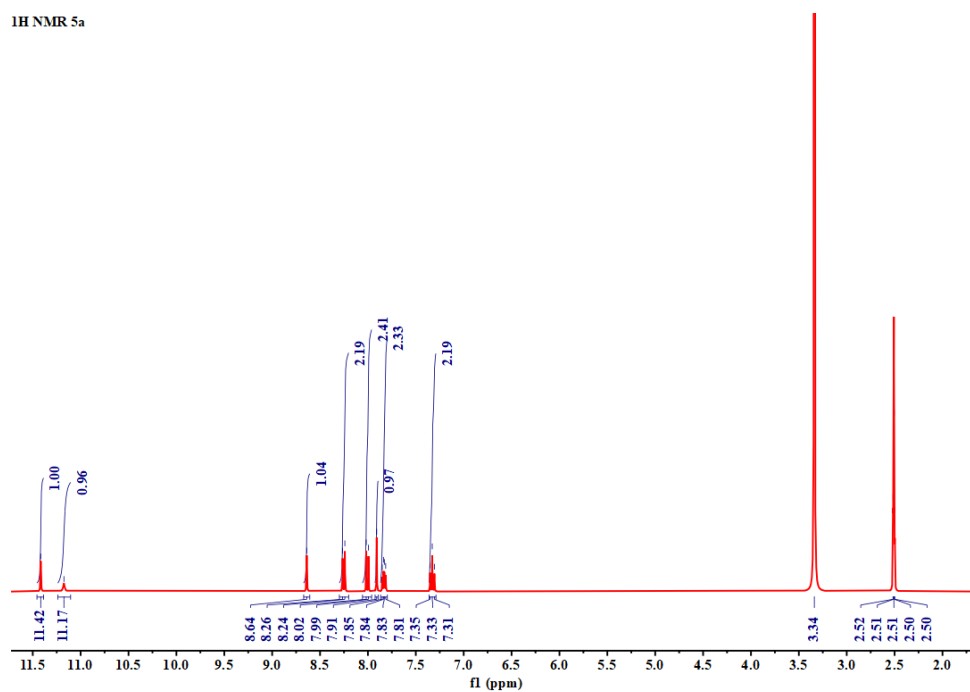

Figure S1:  $^1\text{H}$  NMR spectra of 5a

$^{13}\text{C}$  NMR 5a

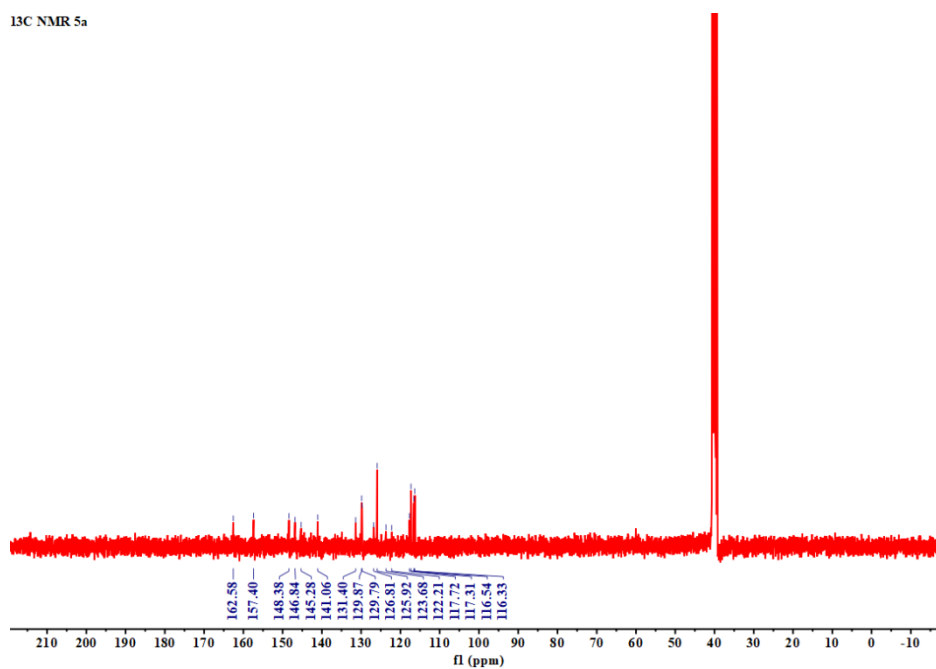

Figure S2:  $^{13}\text{C}$  NMR spectra of 5a

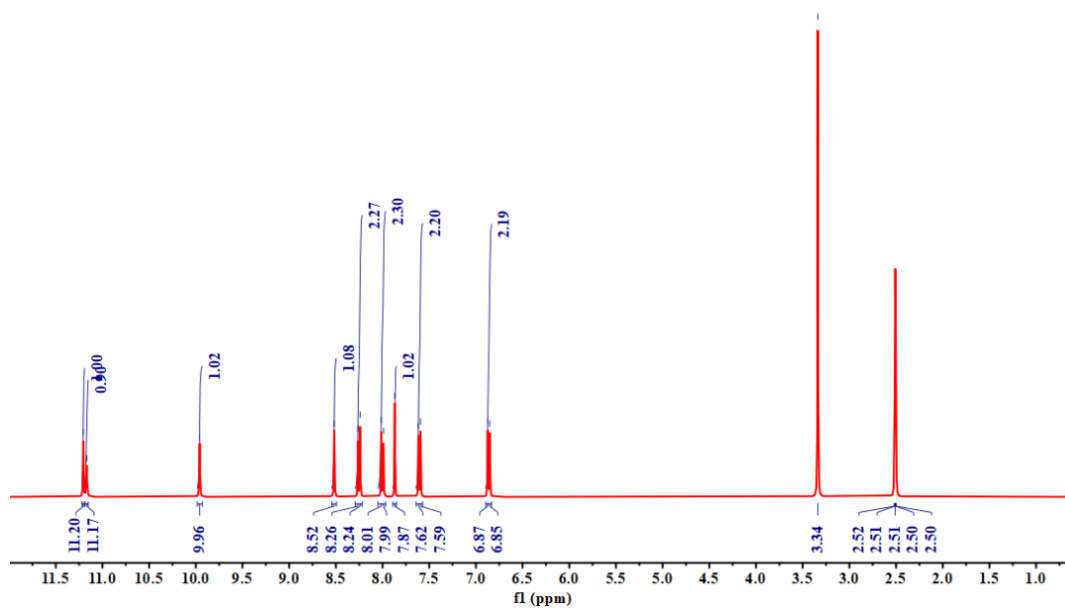

Figure S3: <sup>1</sup>H NMR spectra of 5b

<sup>13</sup>C NMR 5b

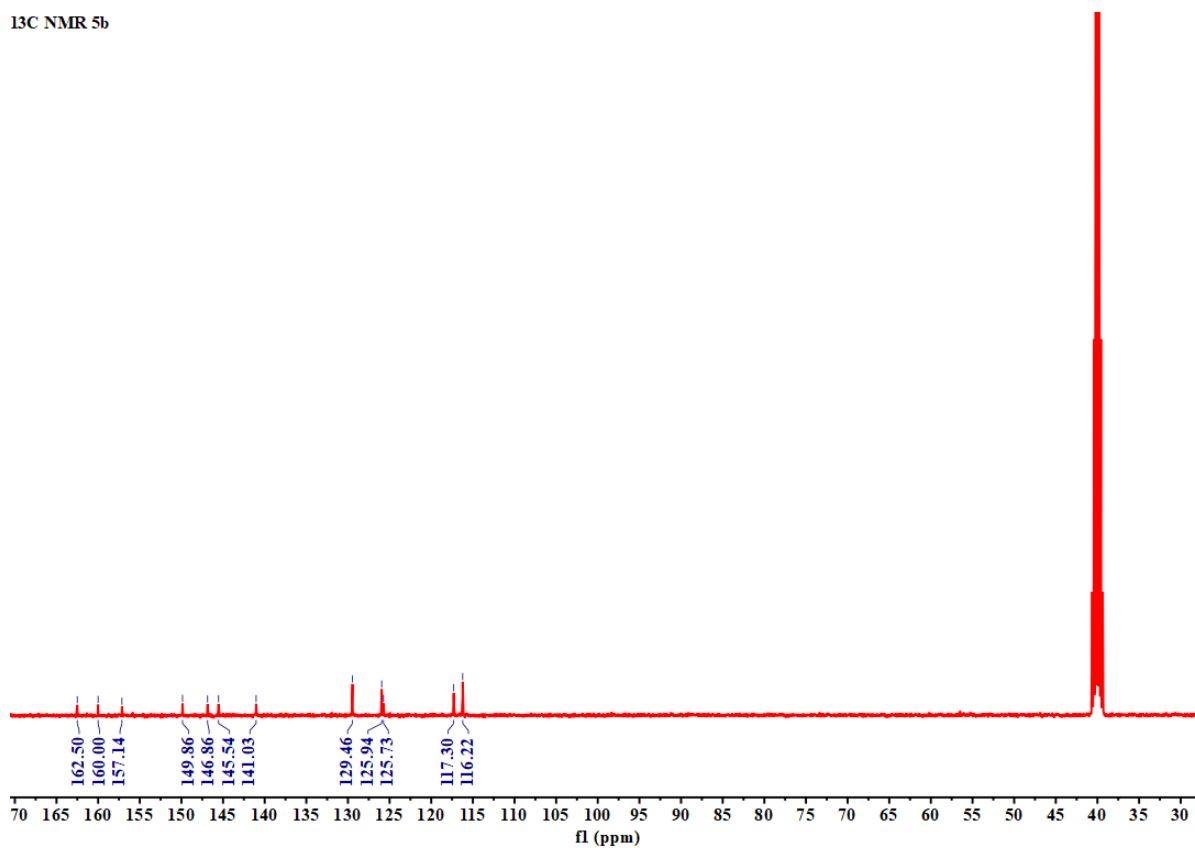

Figure S4: <sup>13</sup>C NMR spectra of 5b

$^1\text{H}$  NMR 5c

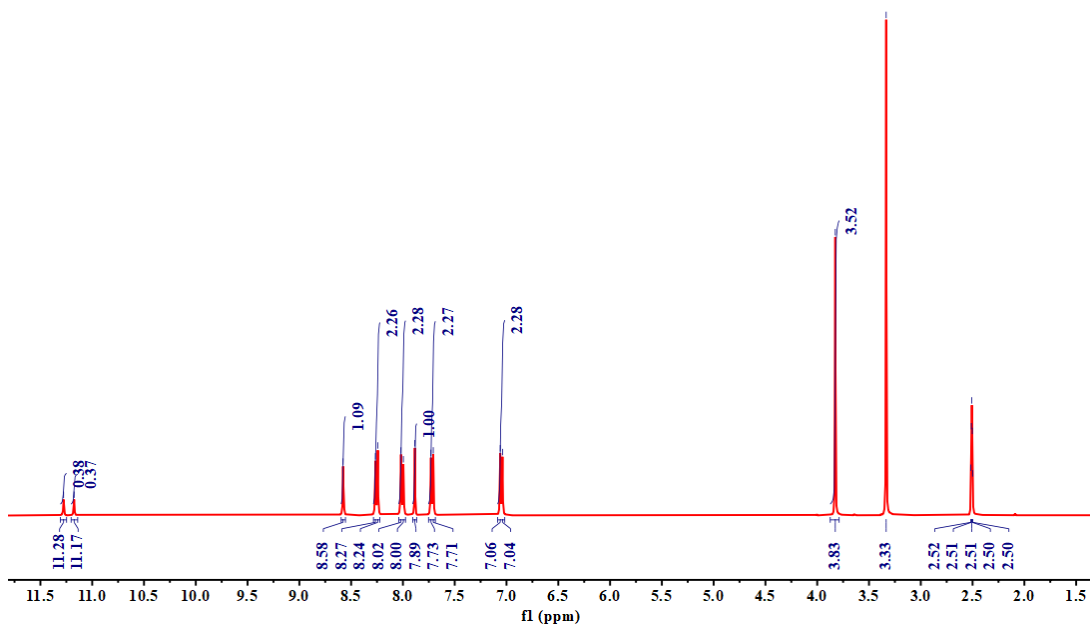

Figure S5:  $^1\text{H}$  NMR spectra of 5c

$^{13}\text{C}$  NMR 5c

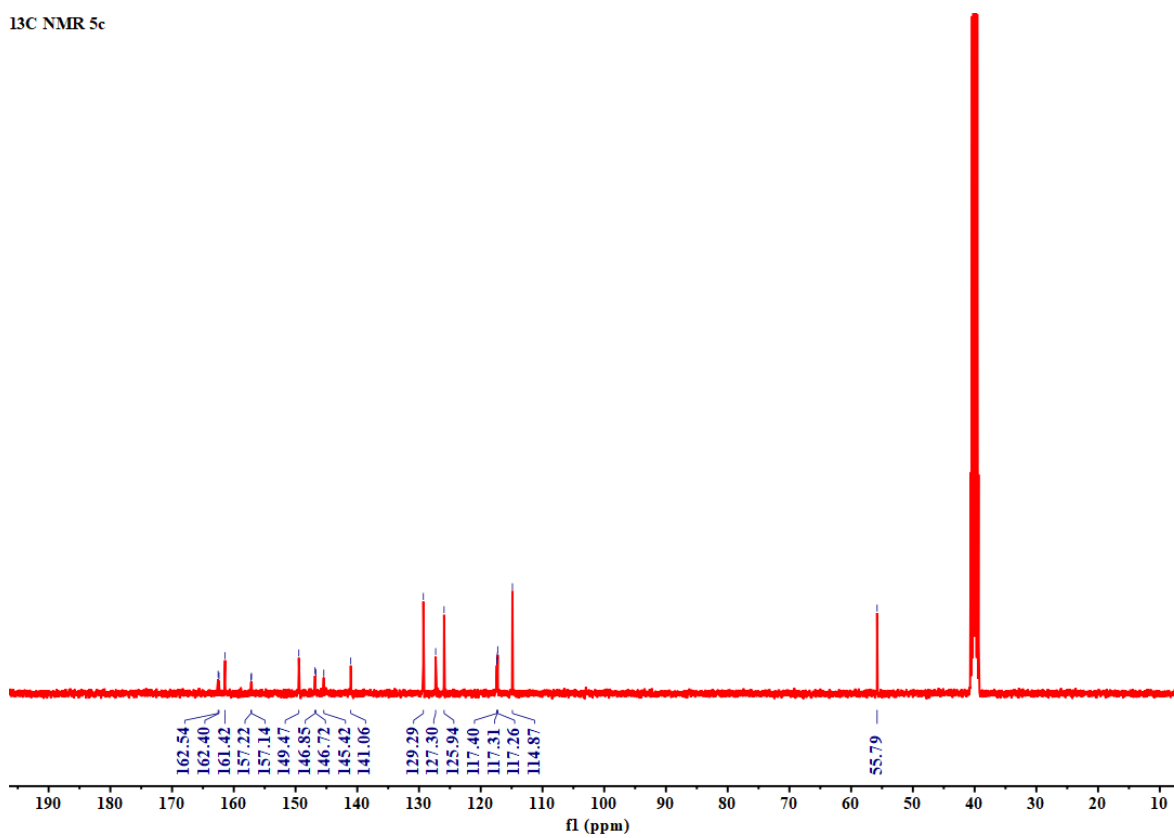

Figure S6:  $^{13}\text{C}$  NMR spectra of 5c

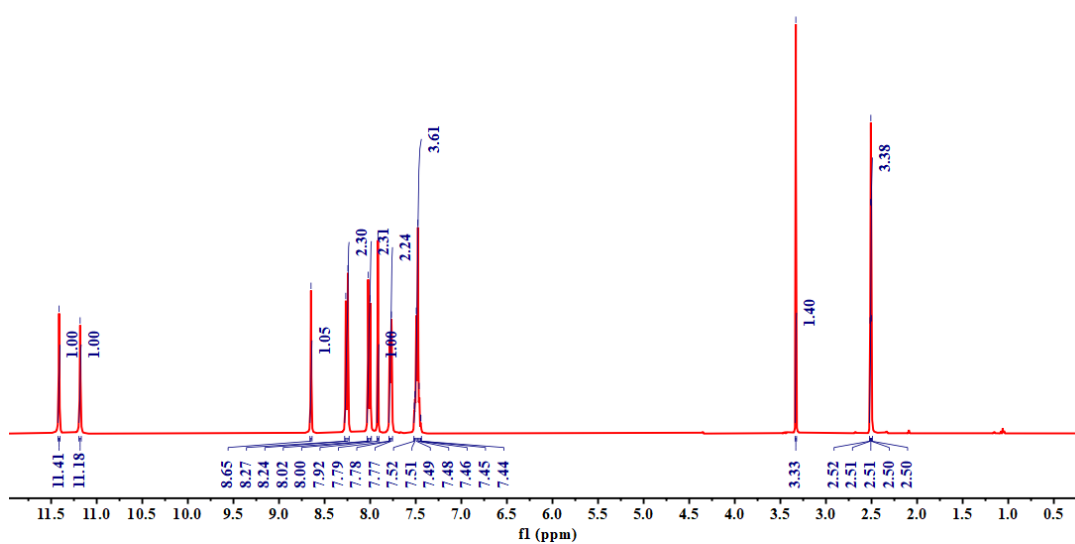

Figure S7: <sup>1</sup>H NMR spectra of 5d

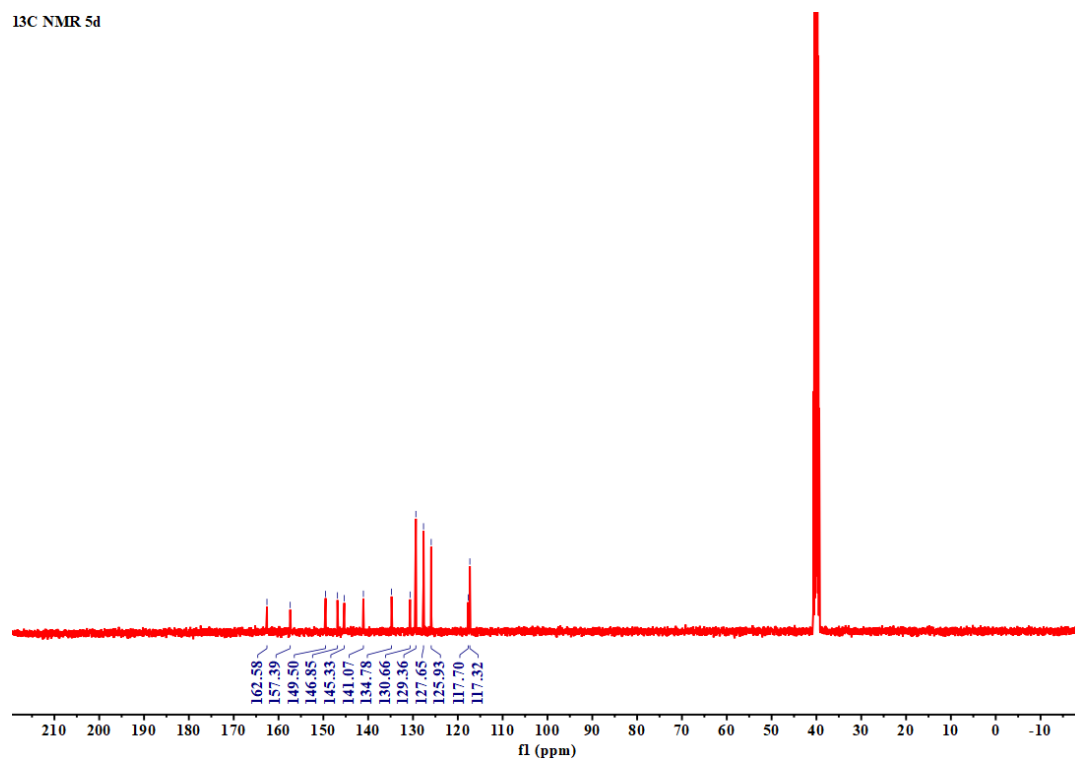

Figure S8: <sup>13</sup>C NMR spectra of 5d

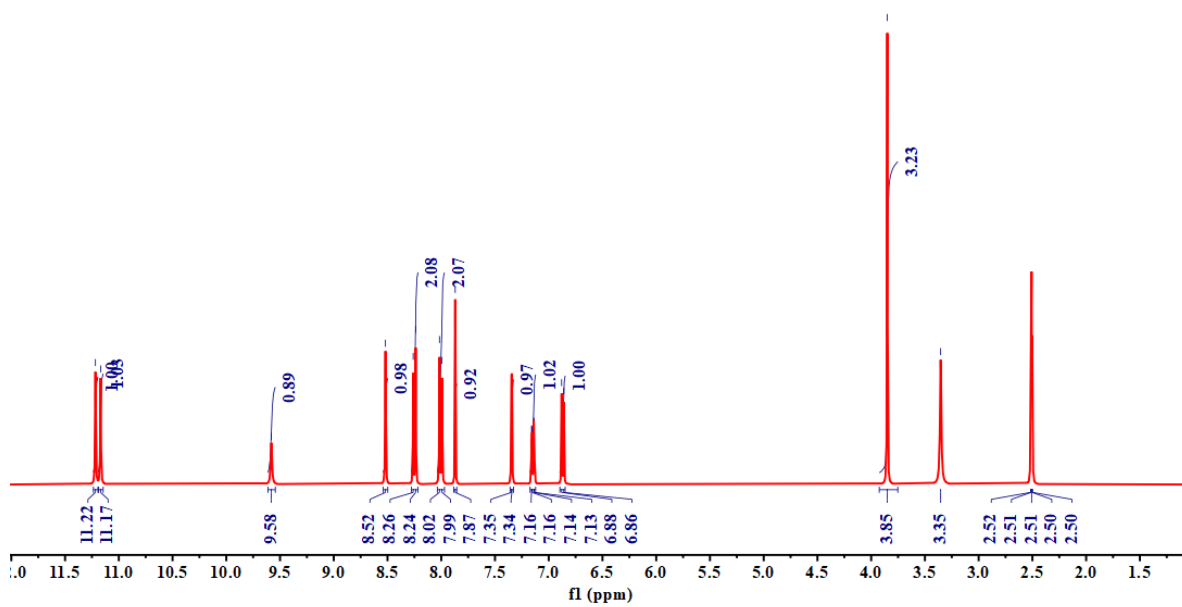

Figure S9: <sup>1</sup>H NMR spectra of 5e

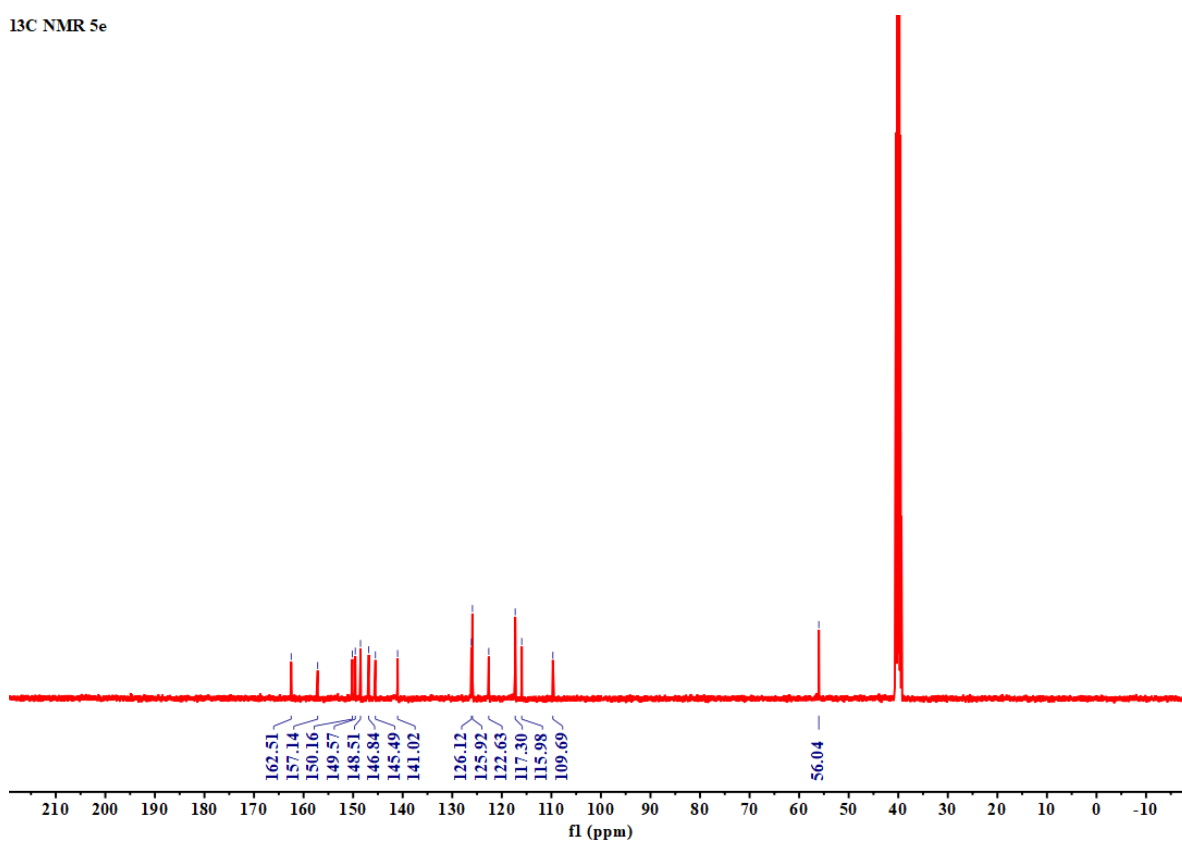

Figure S10: <sup>13</sup>C NMR spectra of 5e

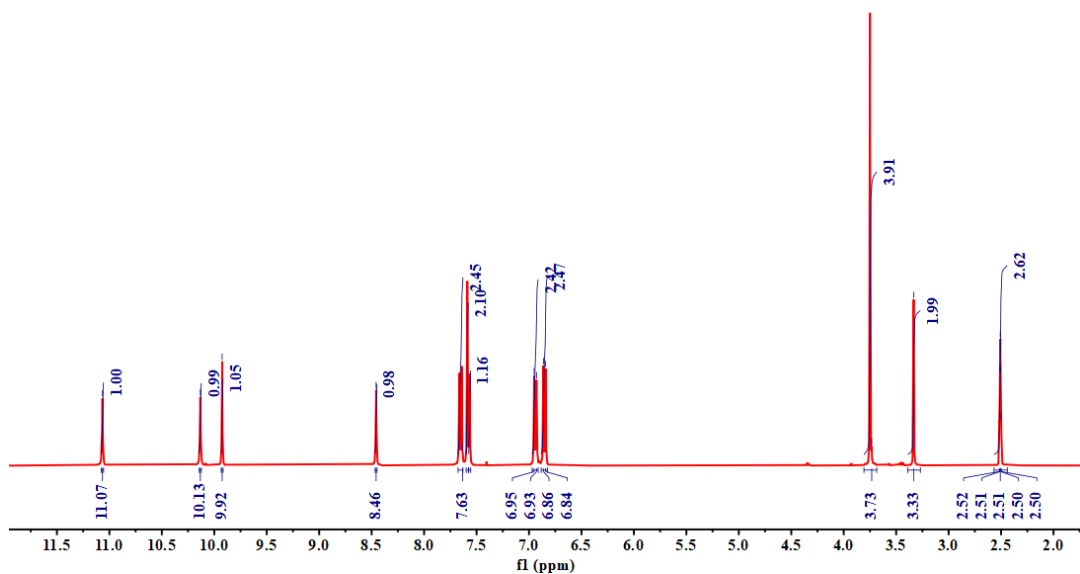

Figure S11: <sup>1</sup>H NMR spectra of 5g

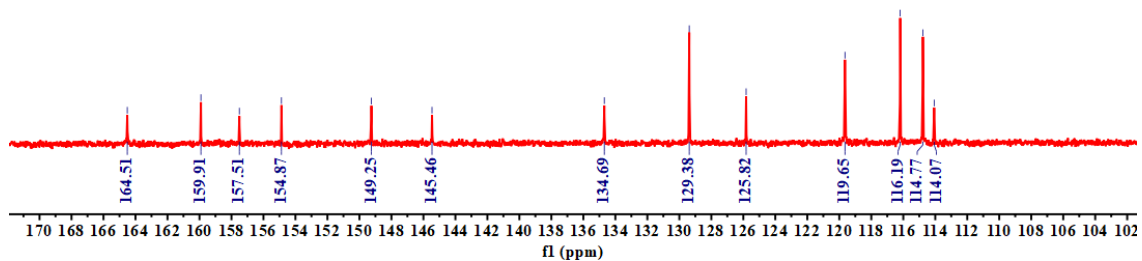

Figure S12: <sup>13</sup>C NMR spectra of 5g



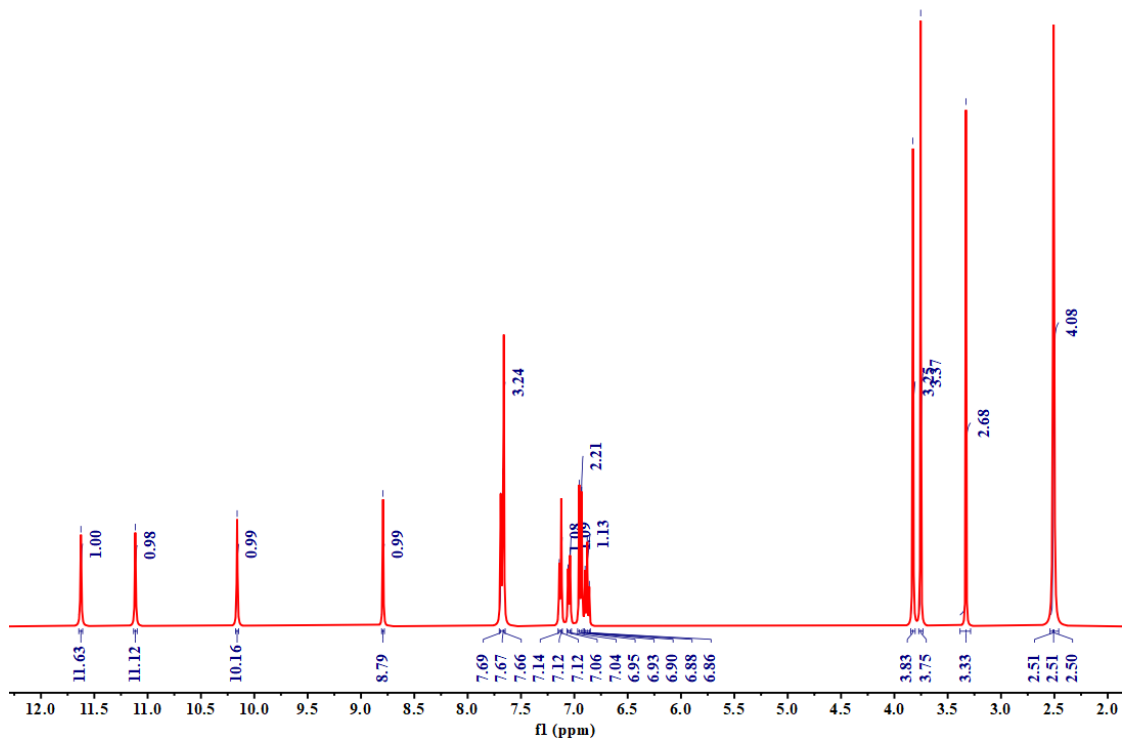

Figure S13: <sup>1</sup>H NMR spectra of 5i

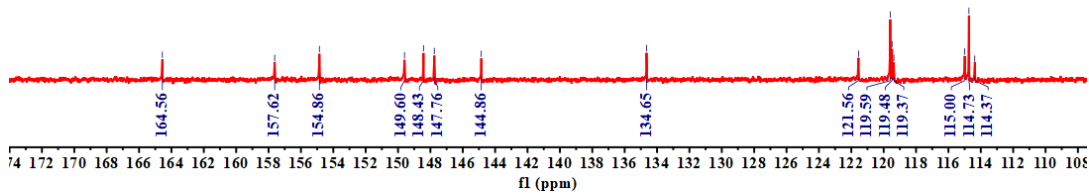

Figure S14: <sup>13</sup>C NMR spectra of 5i

$^1\text{H}$  NMR 5k

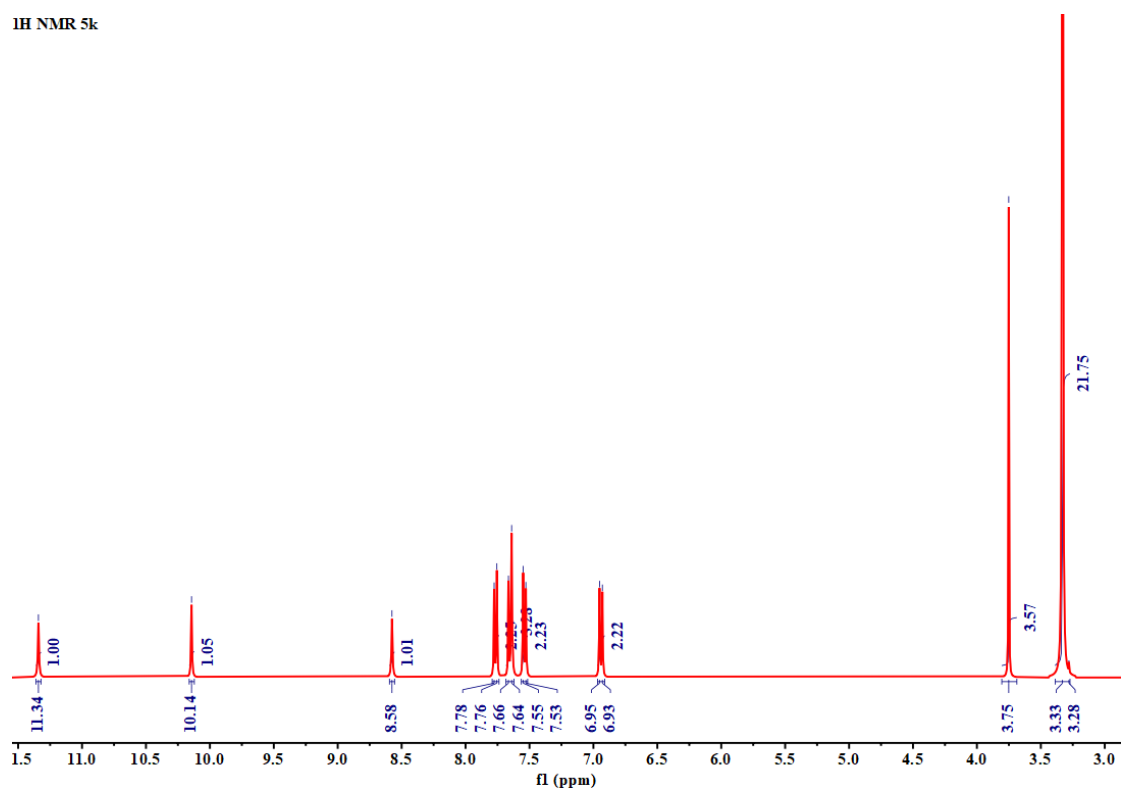

Figure S15:  $^1\text{H}$  NMR spectra of **5k**

$^{13}\text{C}$  NMR 5k

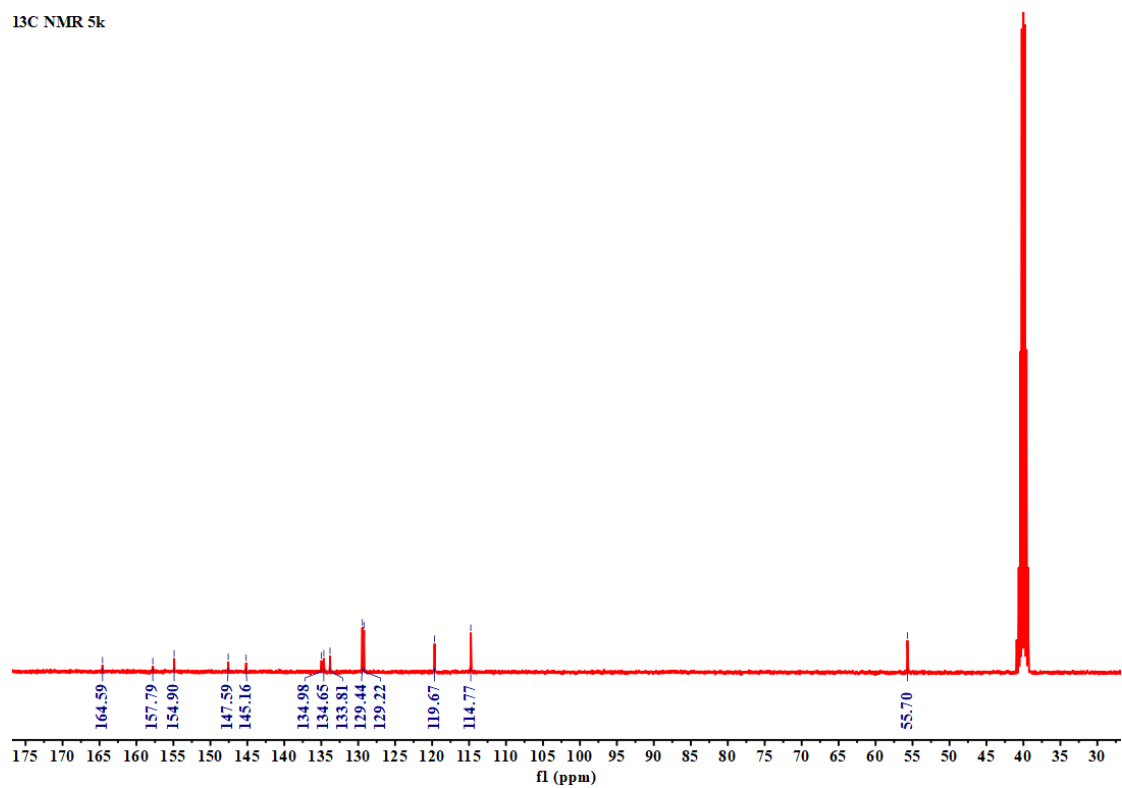

Figure S16:  $^{13}\text{C}$  NMR spectra of **5k**

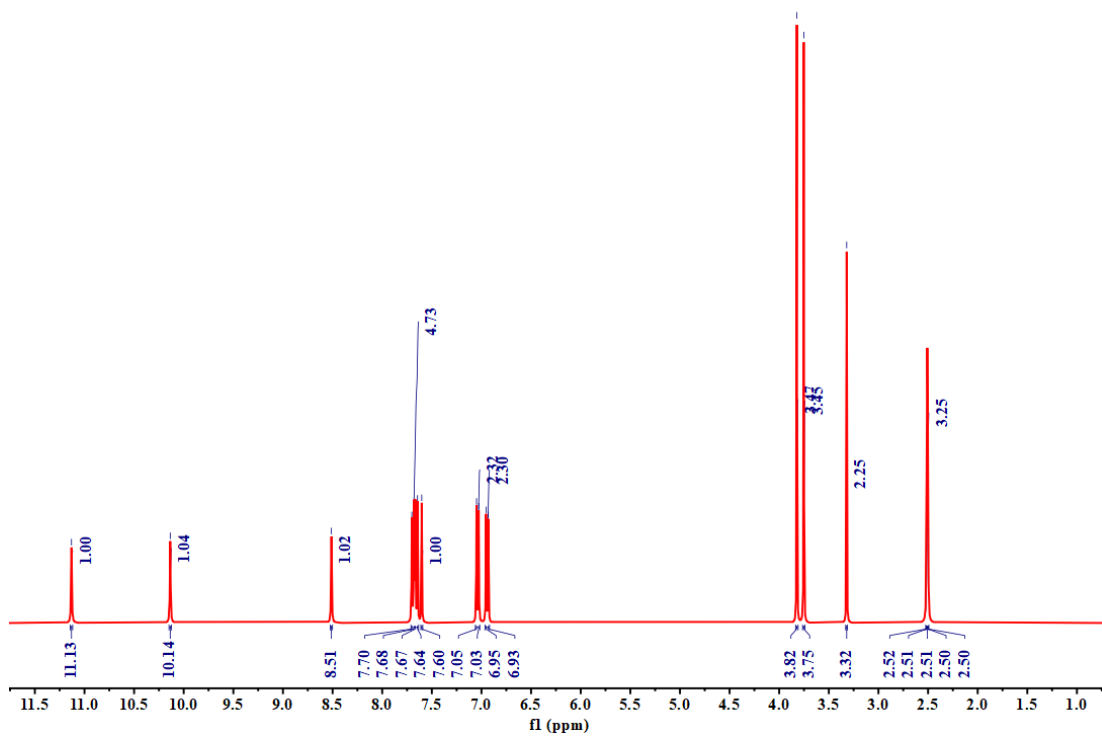

Figure S17: <sup>1</sup>H NMR spectra of 5j

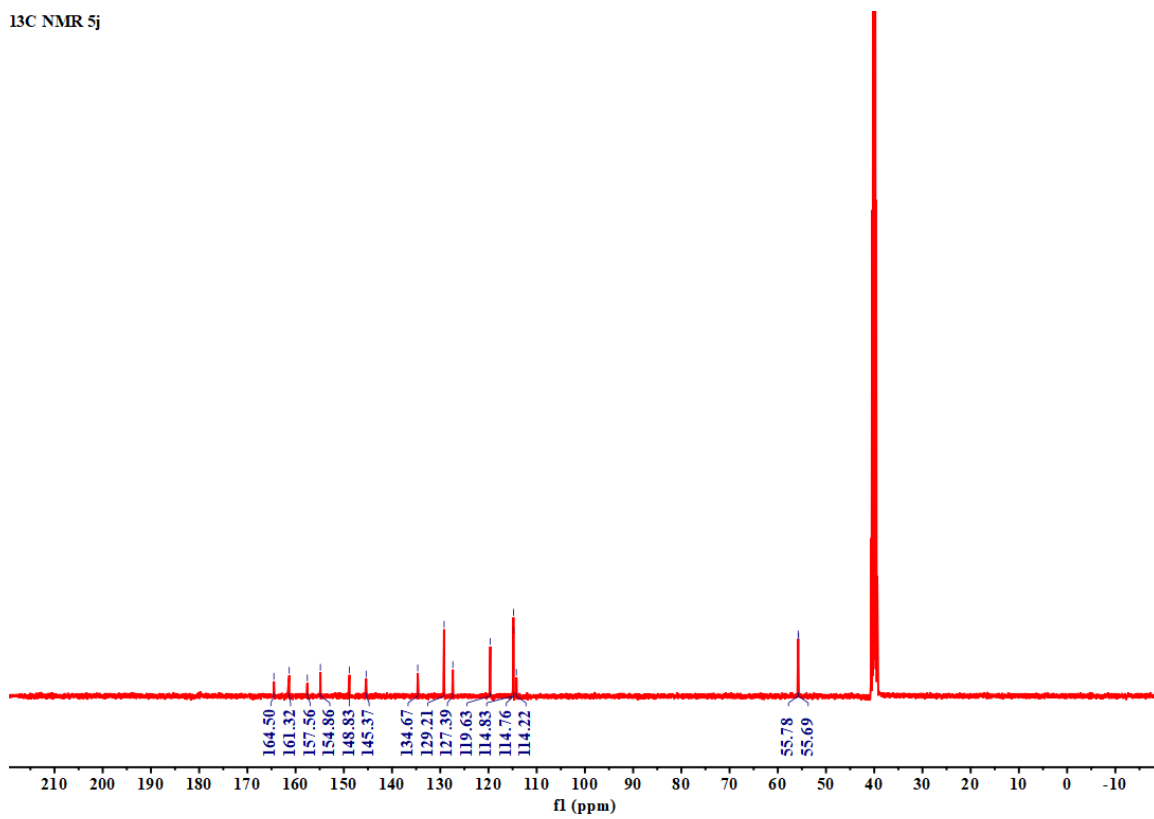

Figure S18: <sup>13</sup>C NMR spectra of 5j

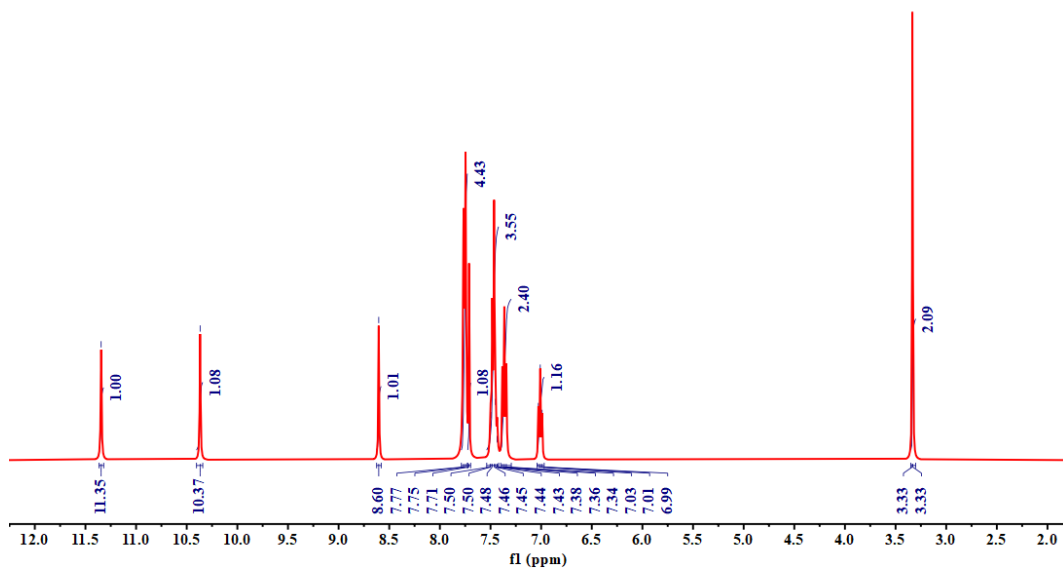

Figure S19: <sup>1</sup>H NMR spectra of 5I

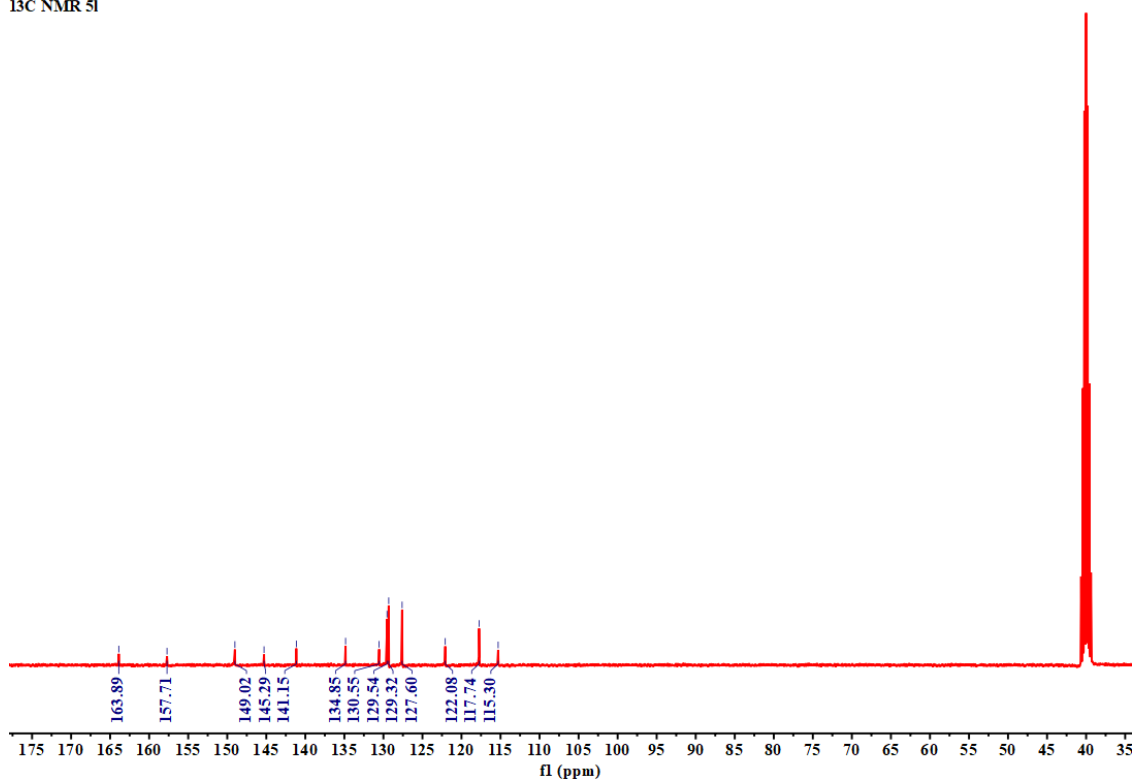

Figure S20: <sup>13</sup>C NMR spectra of 5I

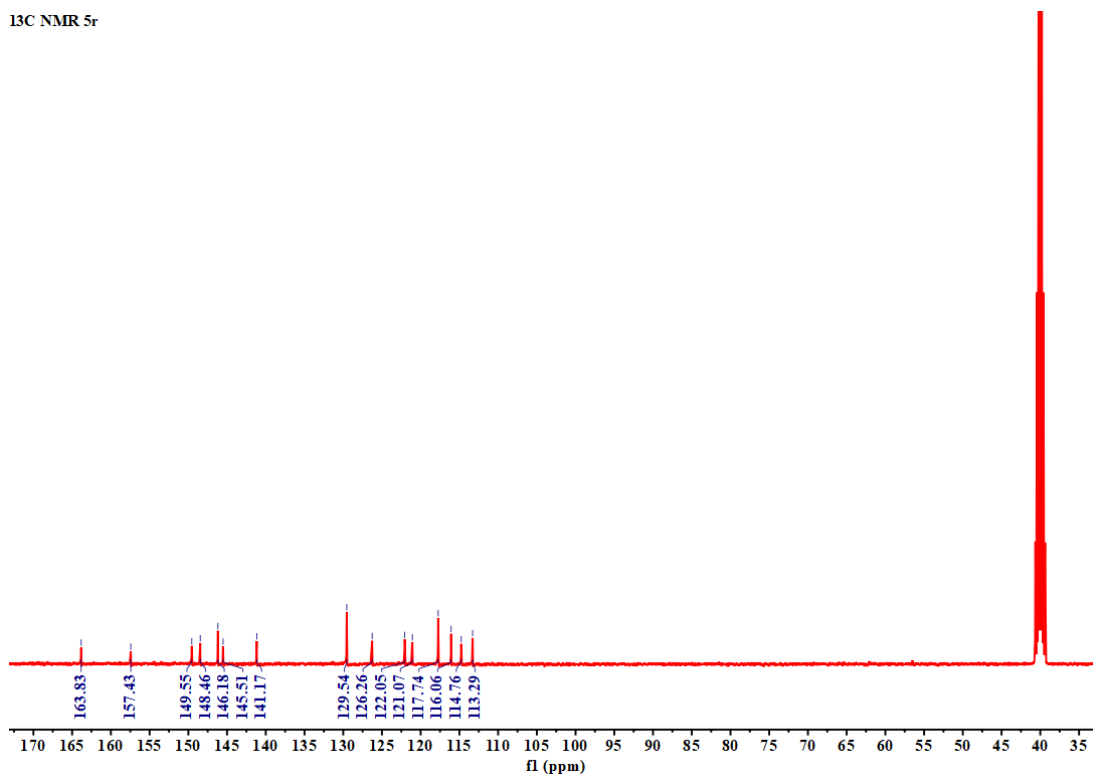

Figure S21: <sup>13</sup>C NMR spectra of 5r

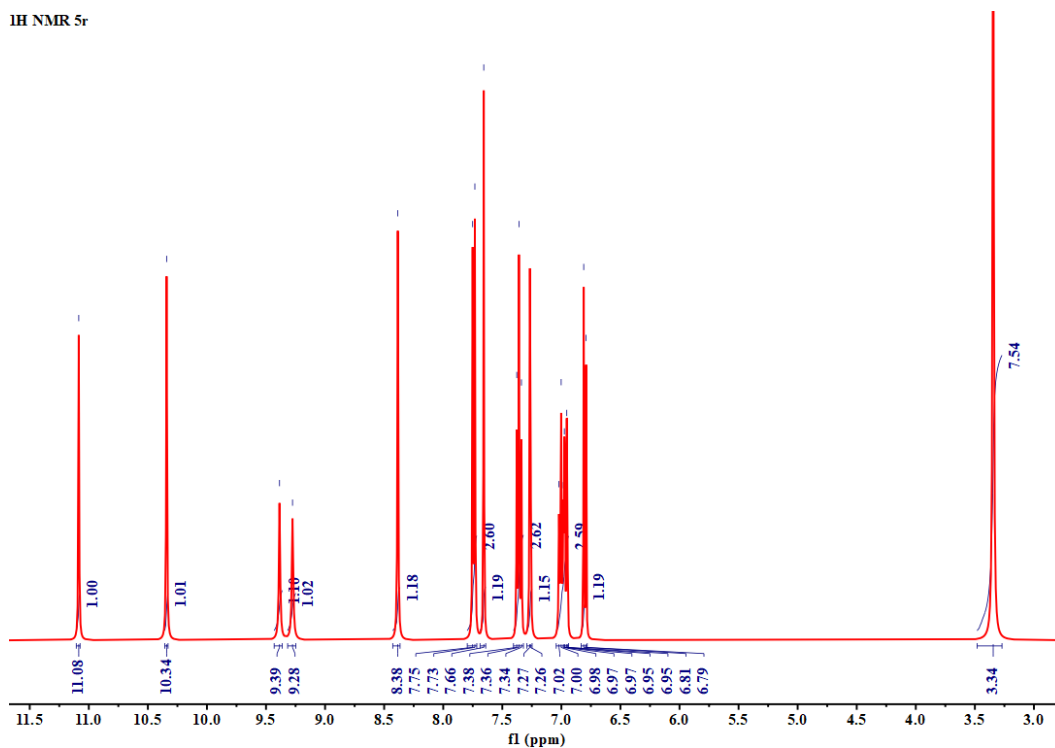

Figure S22: <sup>1</sup>H NMR spectra of 5r

$^1\text{H}$  NMR 5t

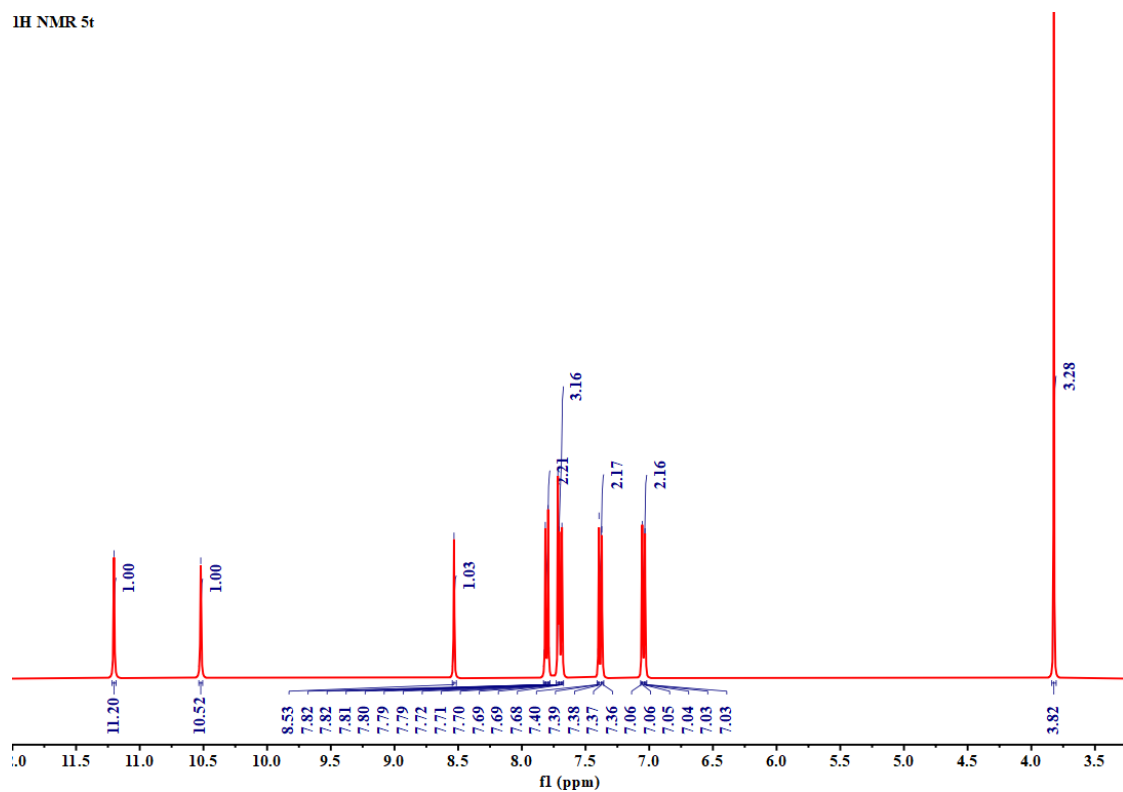

Figure S23:  $^1\text{H}$  spectra of 5t

$^{13}\text{C}$  NMR 5t

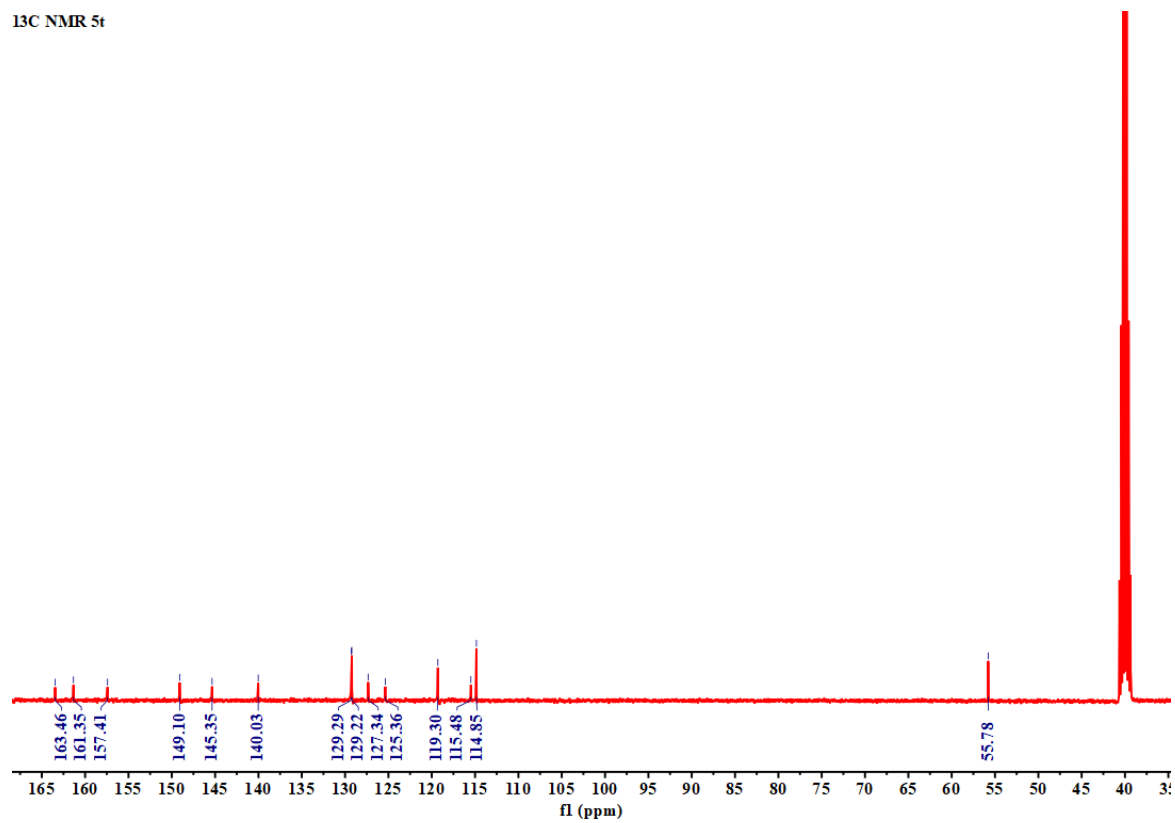

Figure S24:  $^{13}\text{C}$  NMR spectra of 5t

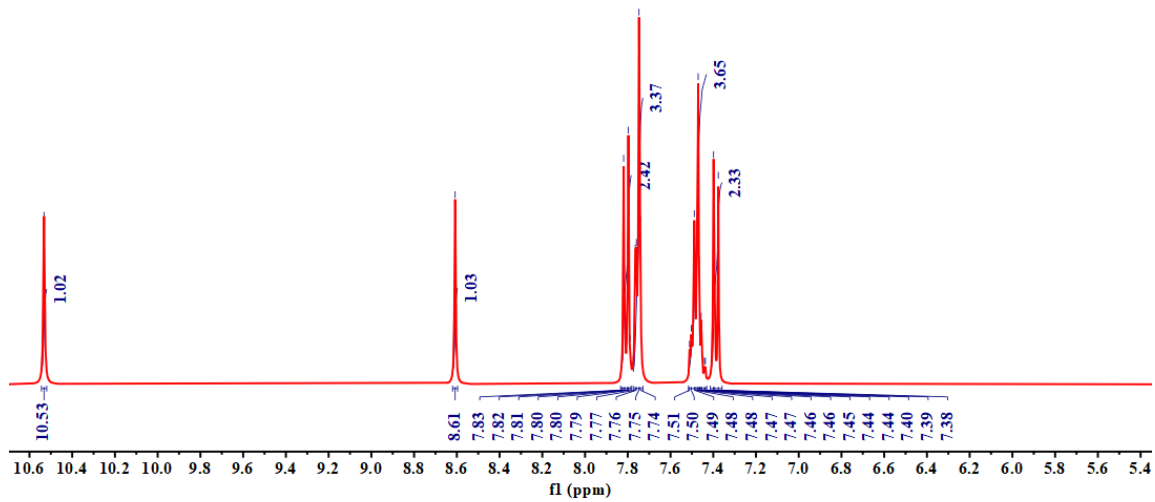

Figure S25: <sup>1</sup>H NMR spectra of 5u

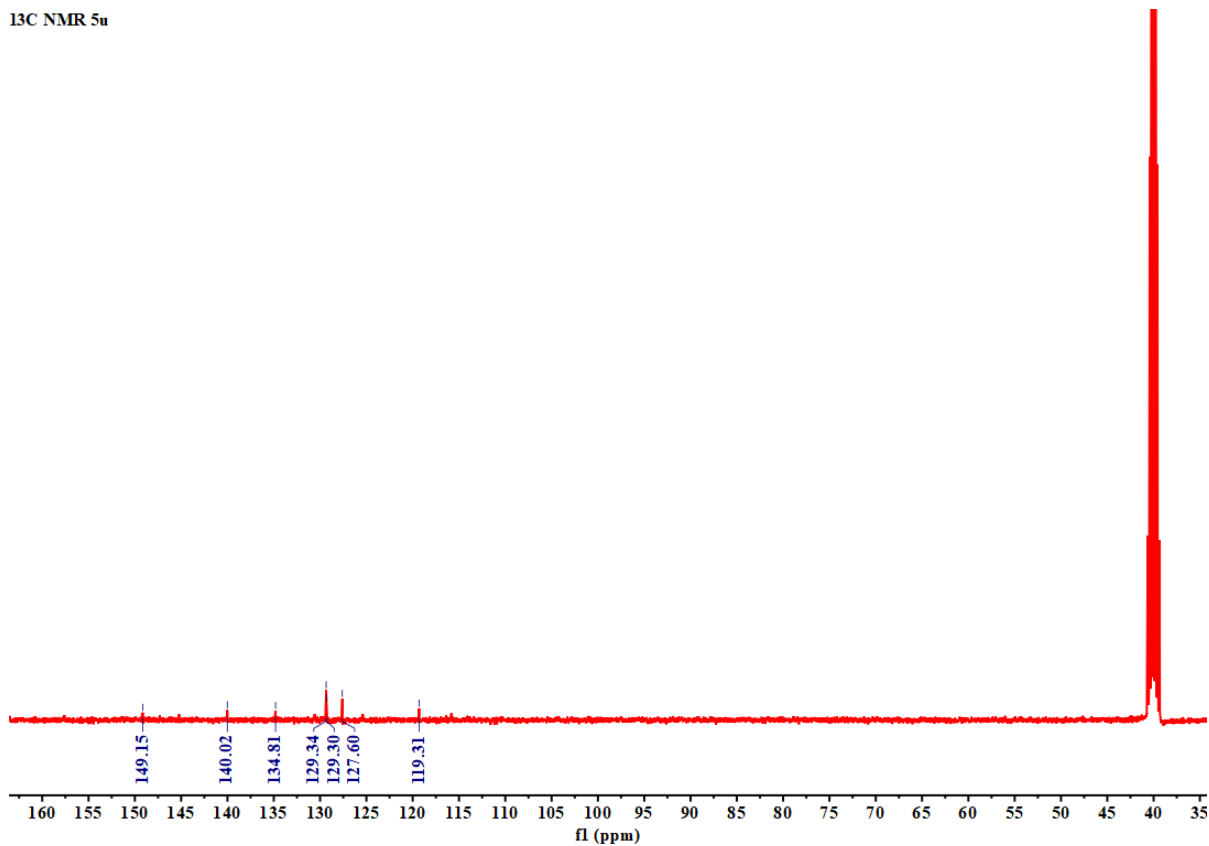

Figure S26: <sup>13</sup>C NMR spectra of 5u

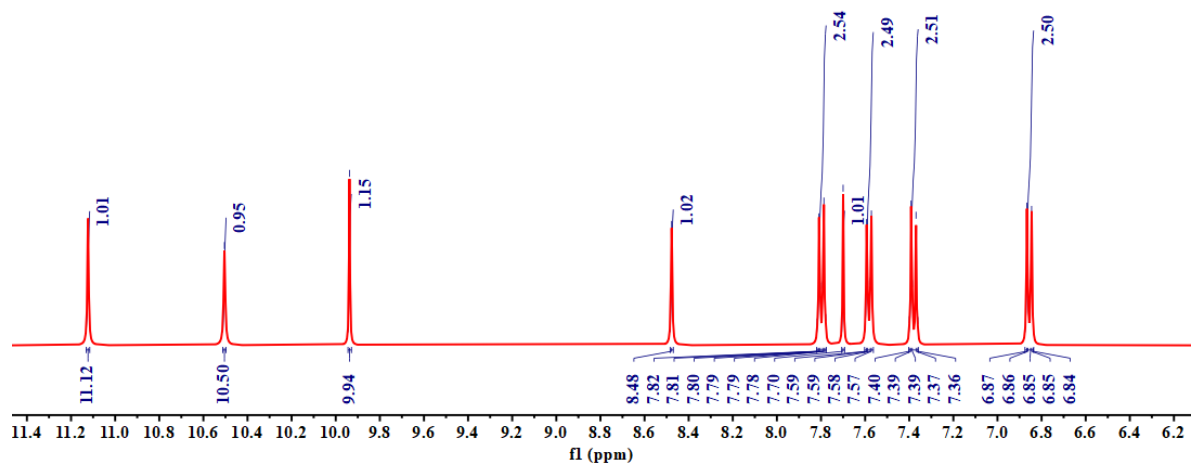

Figure S27: <sup>1</sup>H NMR spectra of 5v

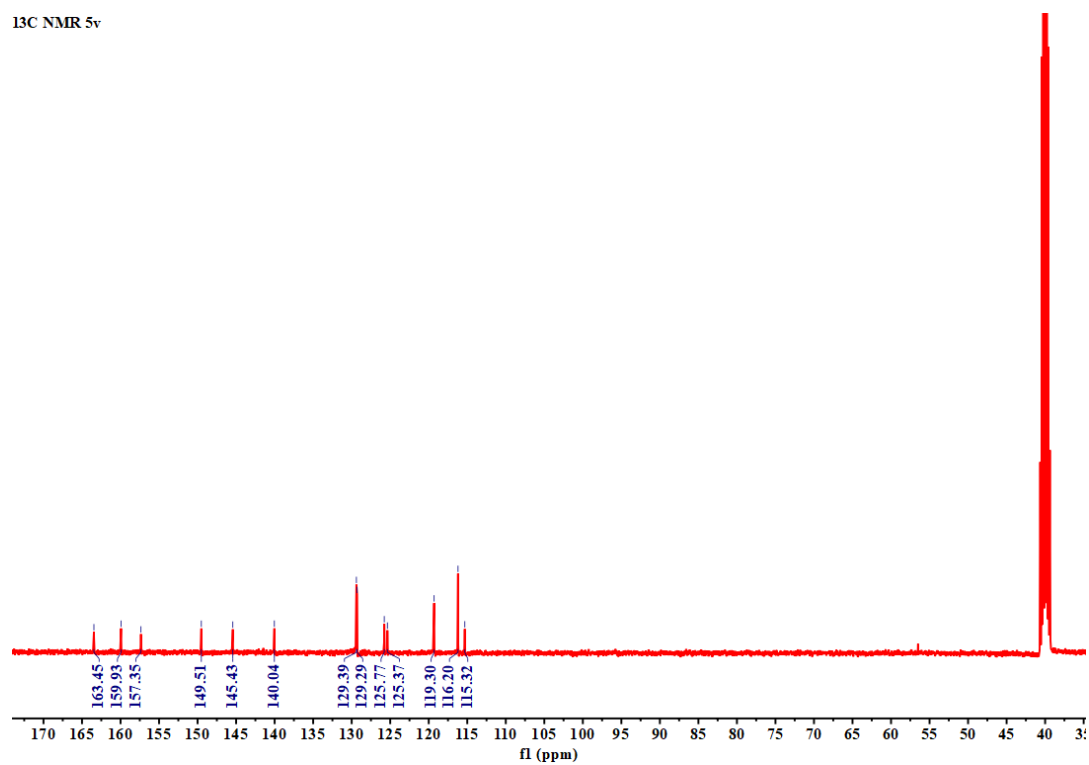

Figure S28: <sup>13</sup>C NMR spectra of 5v



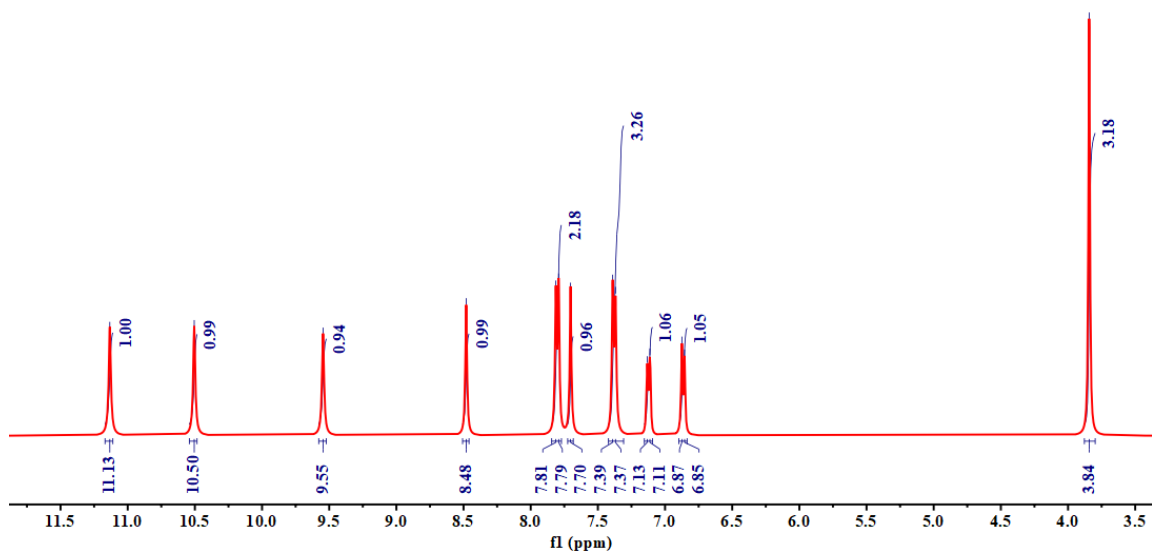

Figure S29: <sup>1</sup>H NMR spectra of 5w

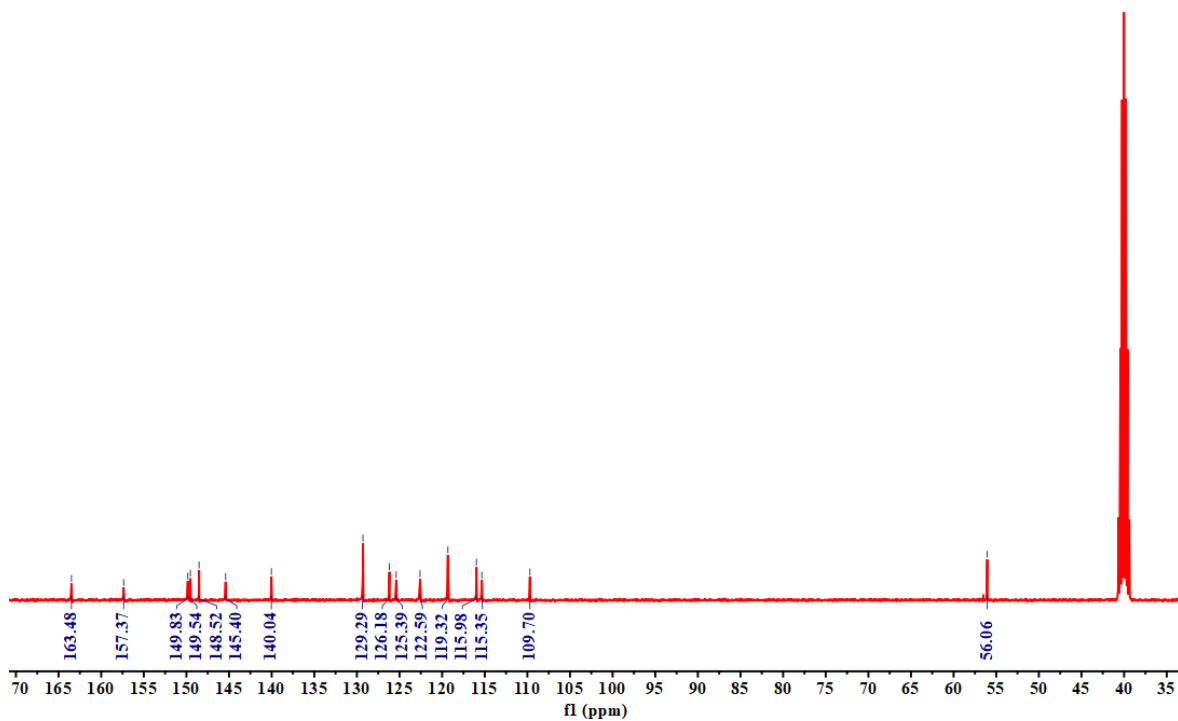

Figure S30: <sup>13</sup>C NMR spectra of 5w

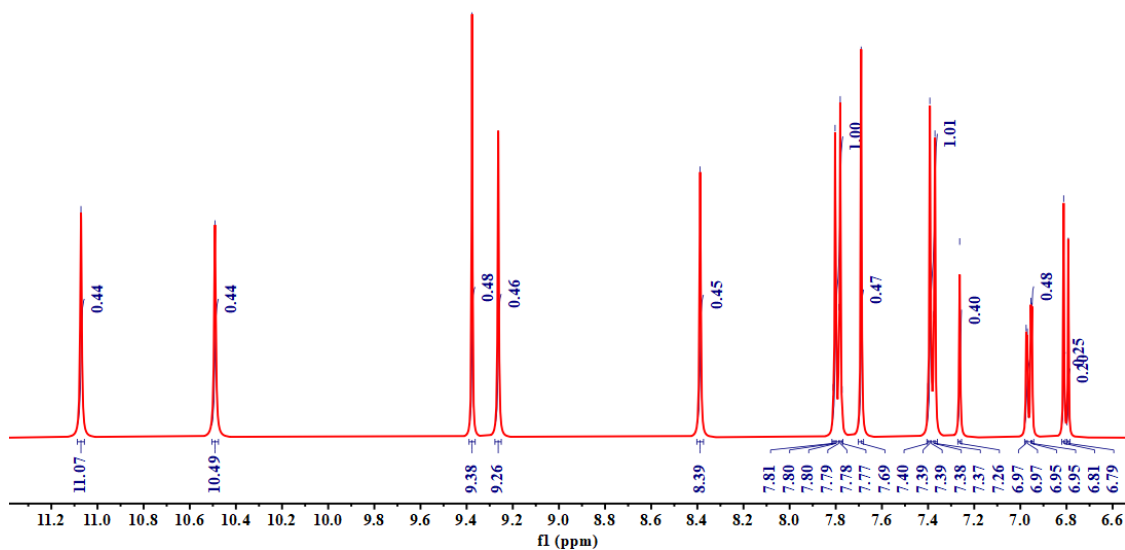

Figure S31: <sup>1</sup>H NMR spectra of 5x

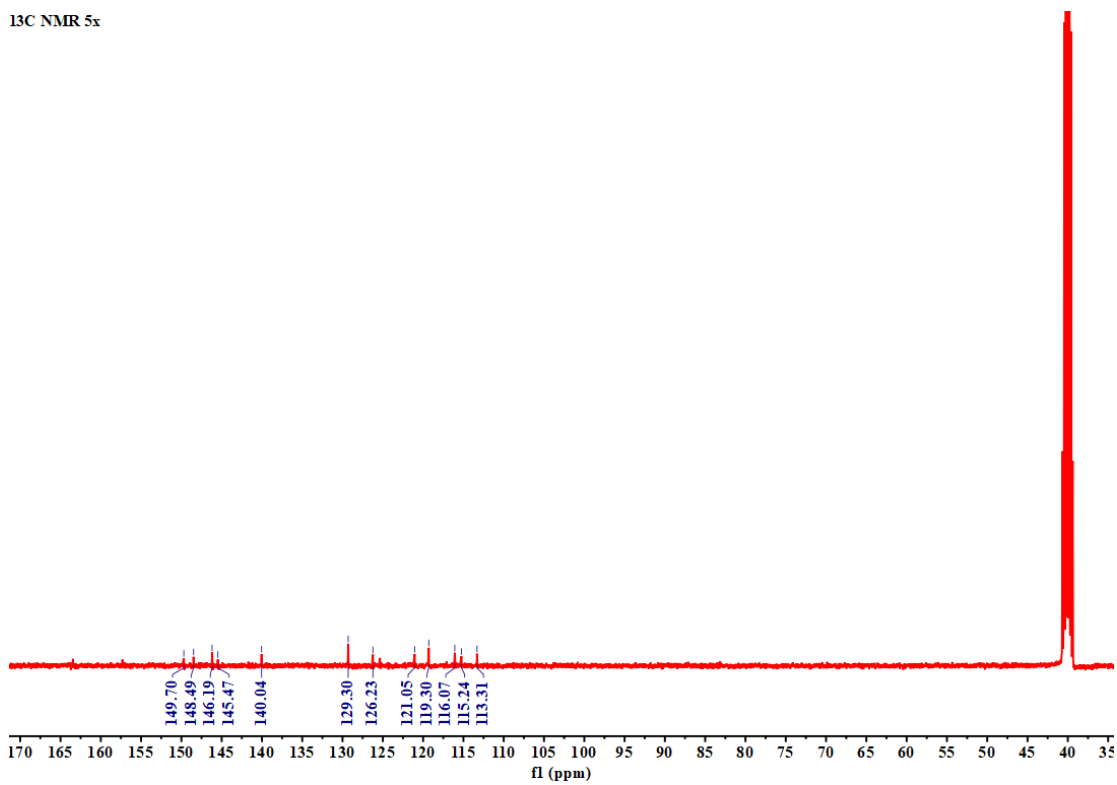

Figure S32: <sup>13</sup>C NMR Spectra of 5x

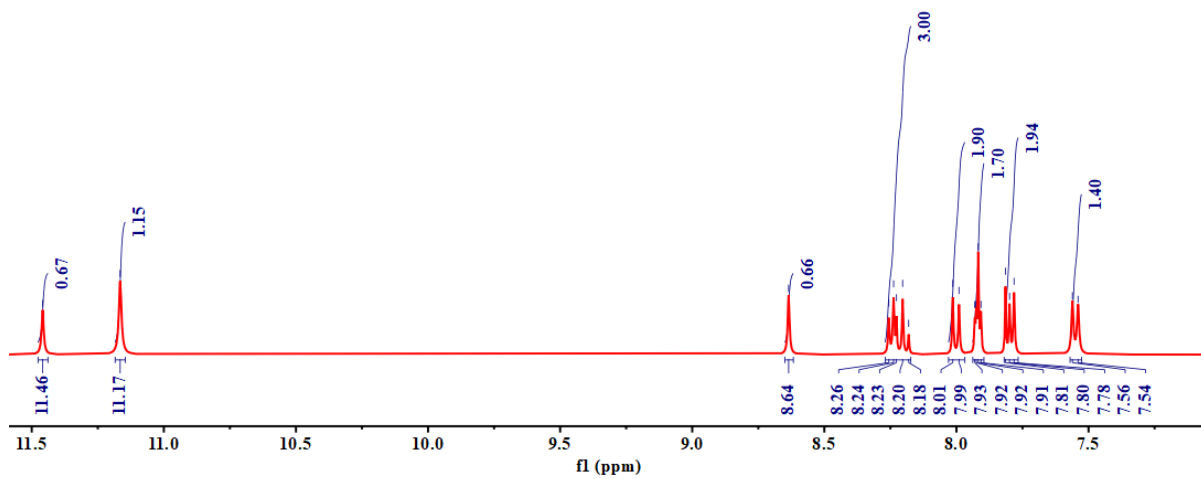

Figure S33: <sup>1</sup>H NMR spectra of 5f

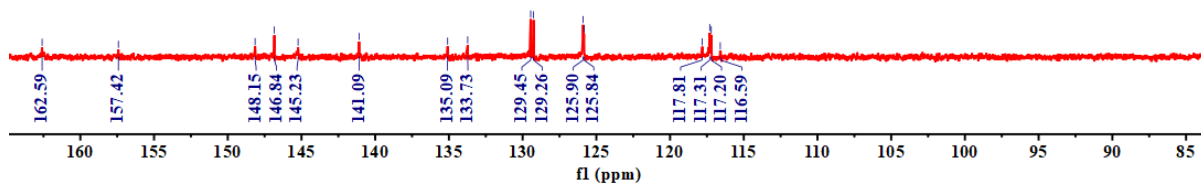

Figure S34: <sup>13</sup>C NMR spectra of 5f

**<sup>1</sup>H NMR 5n**

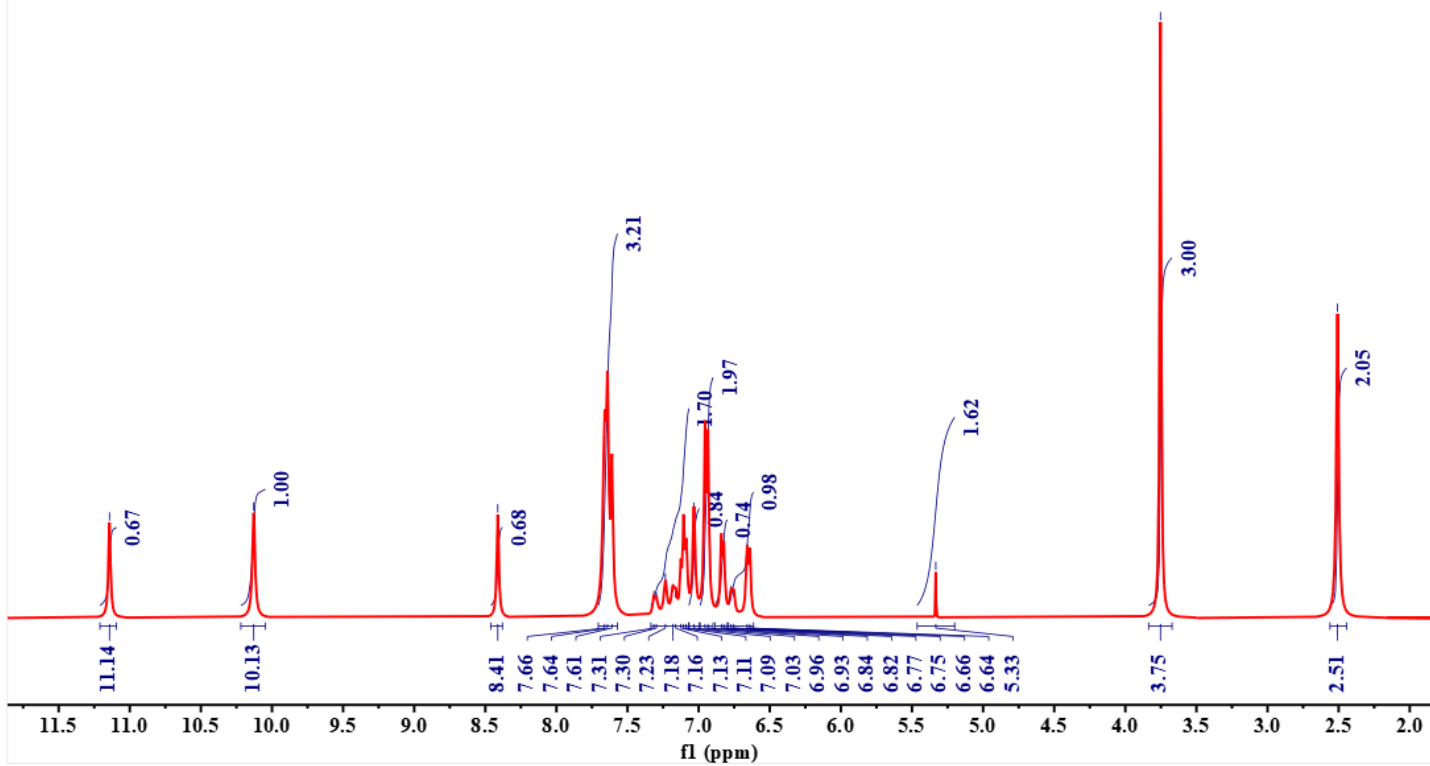

Figure S35: <sup>1</sup>H NMR spectra of 5n

**<sup>13</sup>C NMR 5n**

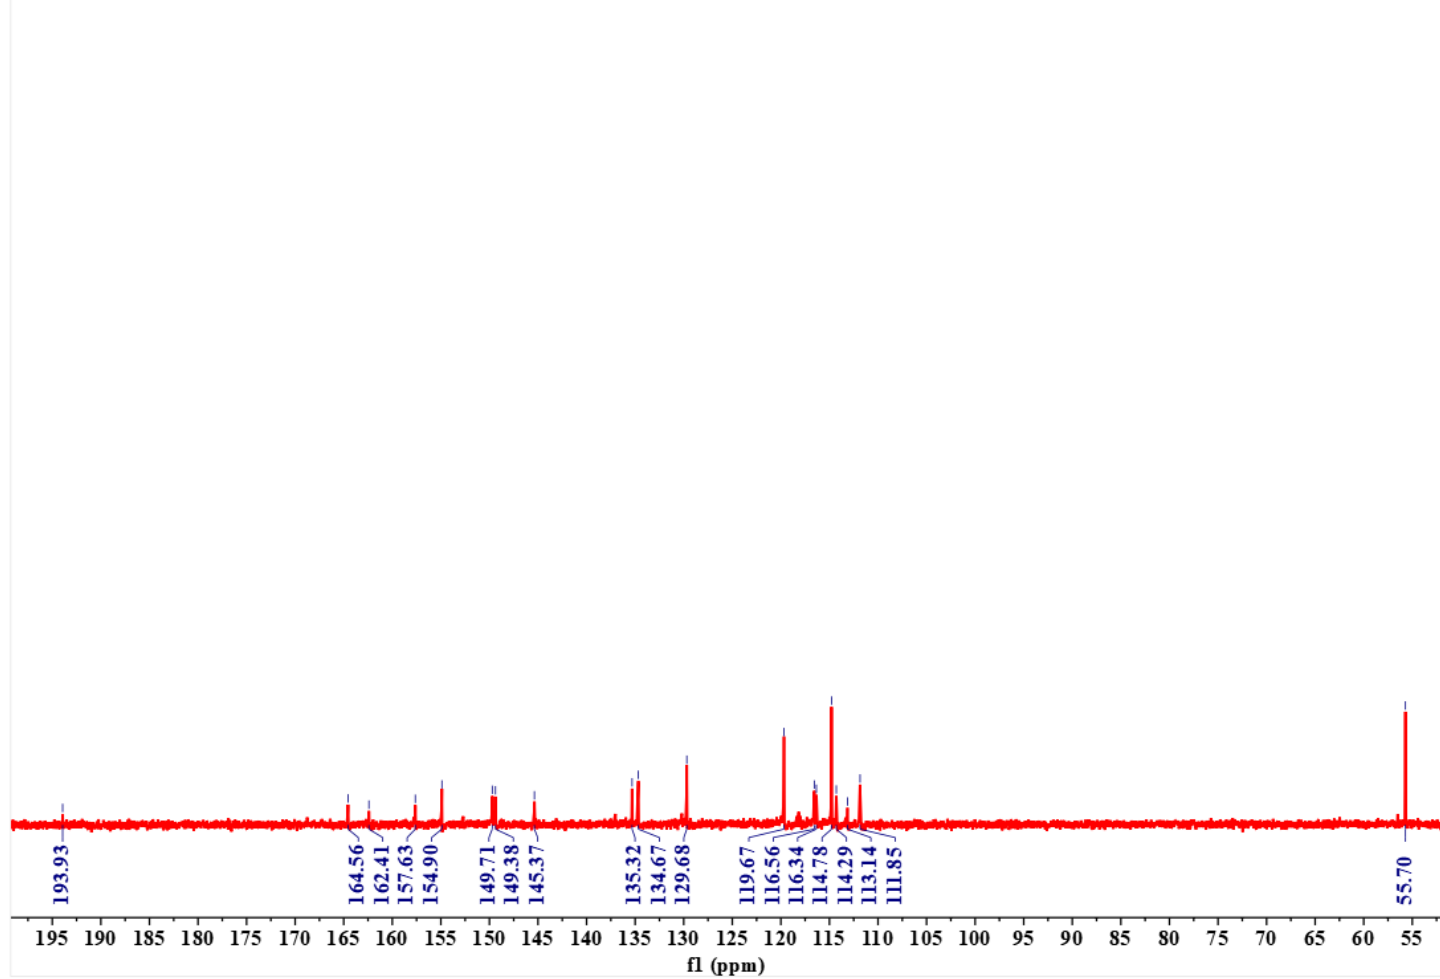

Figure S36: <sup>13</sup>C NMR spectra of 5n

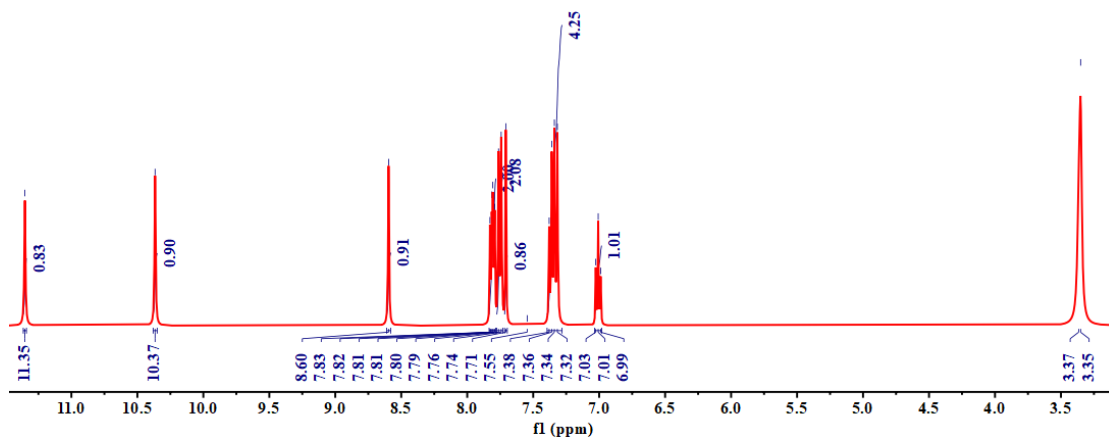

Figure S37: <sup>1</sup>H NMR spectra of 5o

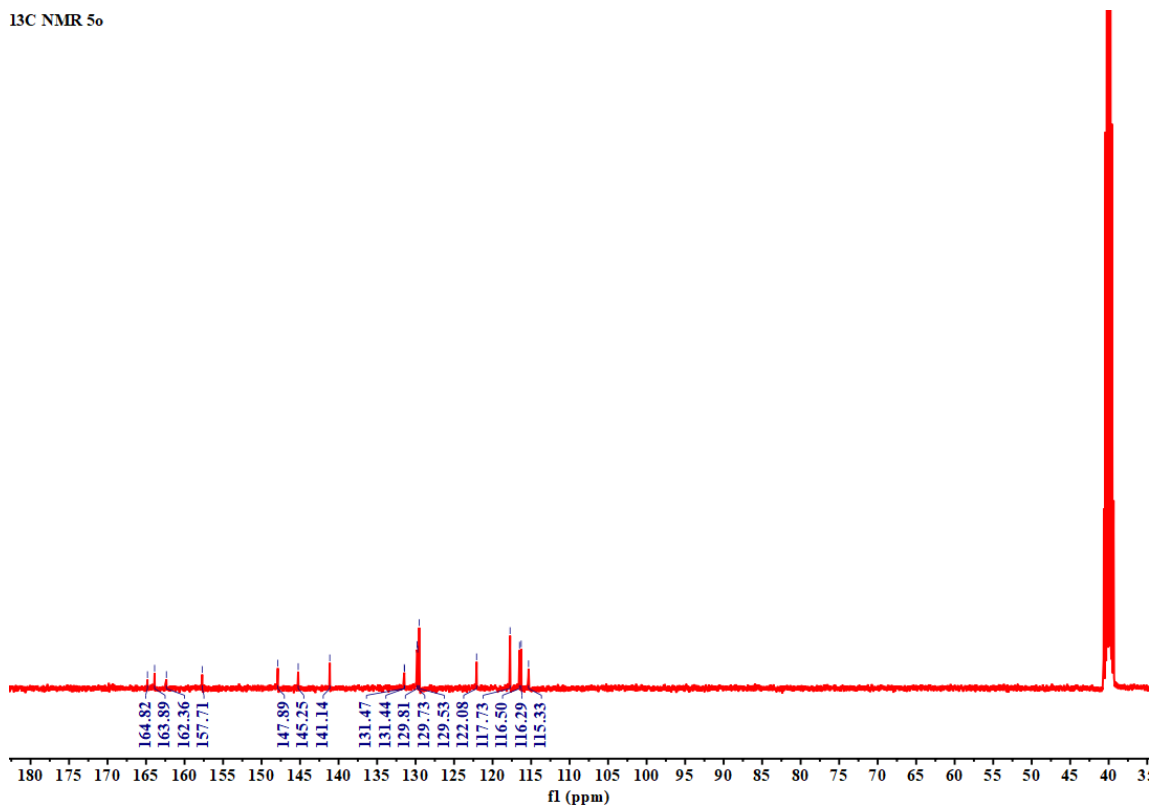

Figure S38: <sup>13</sup>C NMR spectra of 5o

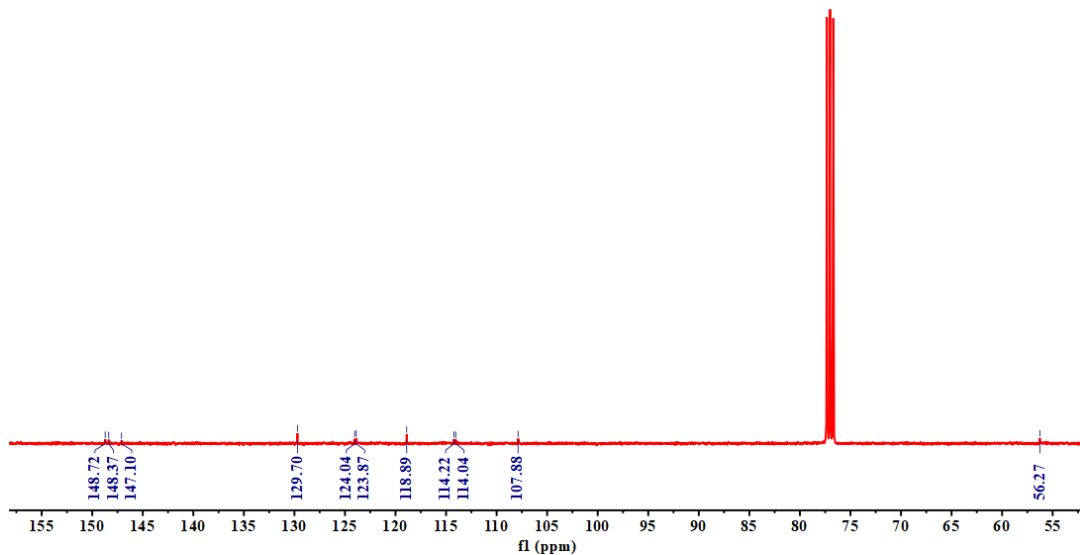

Figure S39: <sup>1</sup>H NMR spectra of 5p

<sup>1</sup>H NMR 5p

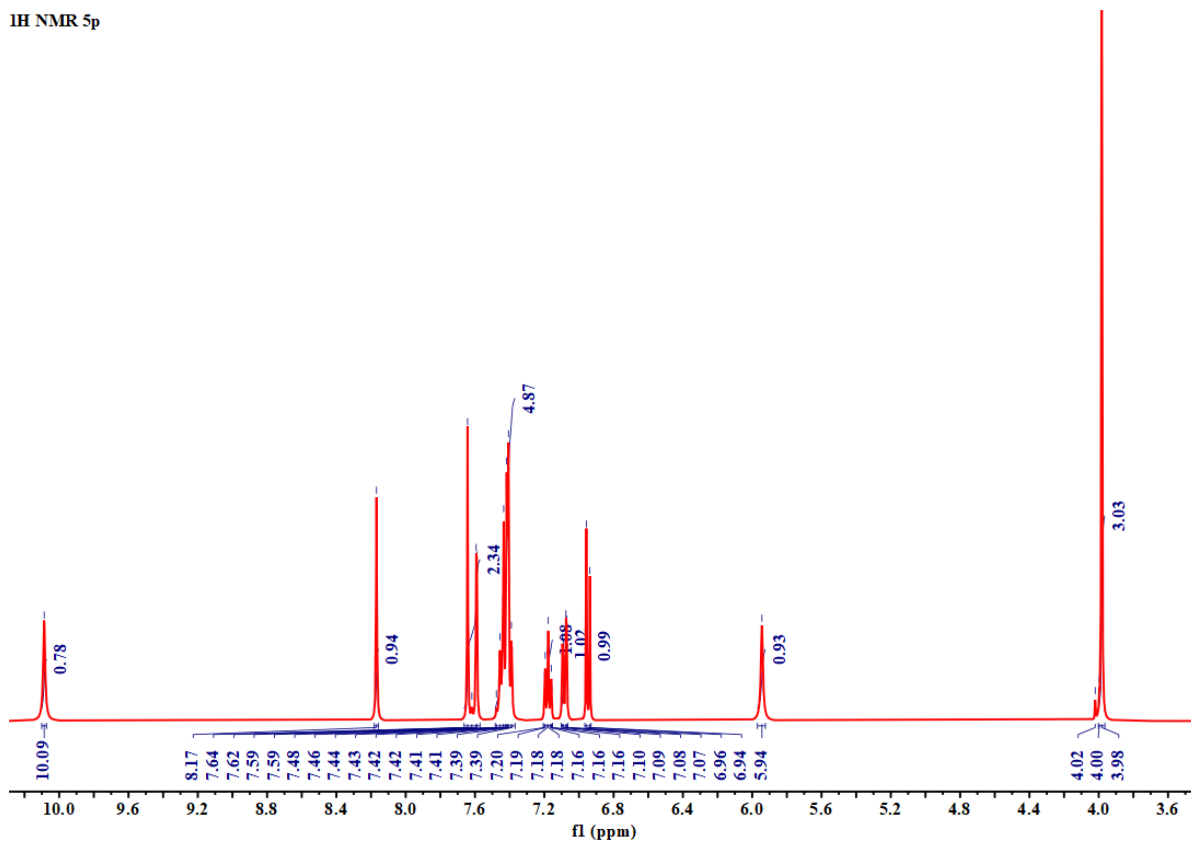

Figure S40: <sup>13</sup>C NMR spectra of 5p

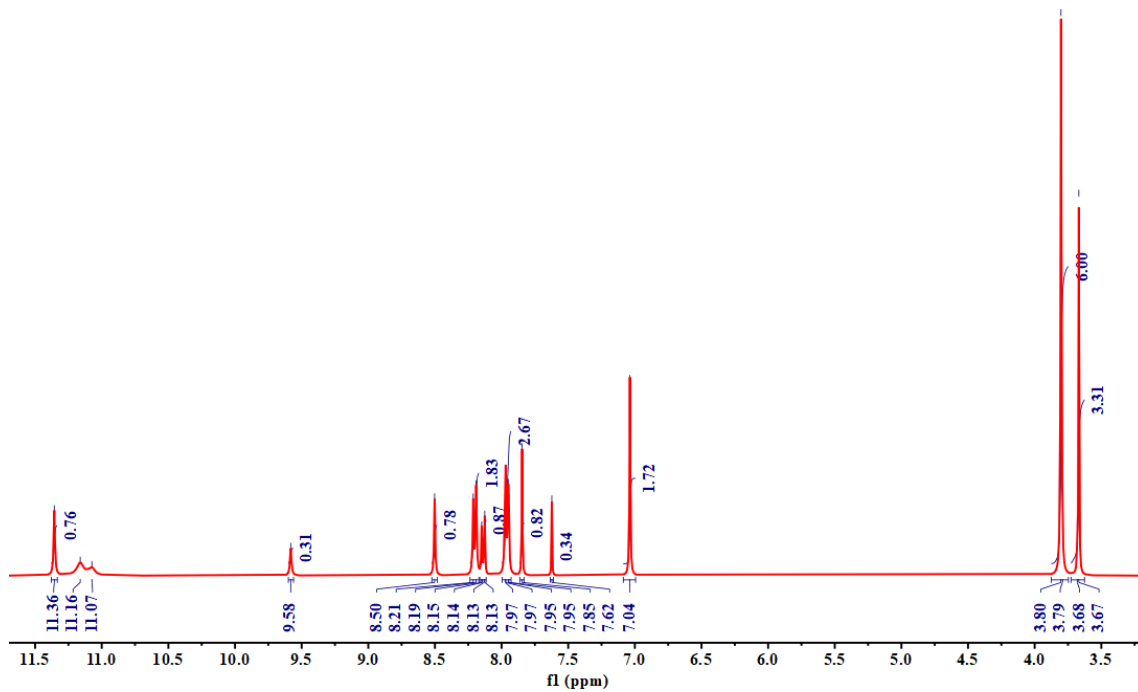

Figure S41: <sup>1</sup>H NMR spectra of 5y

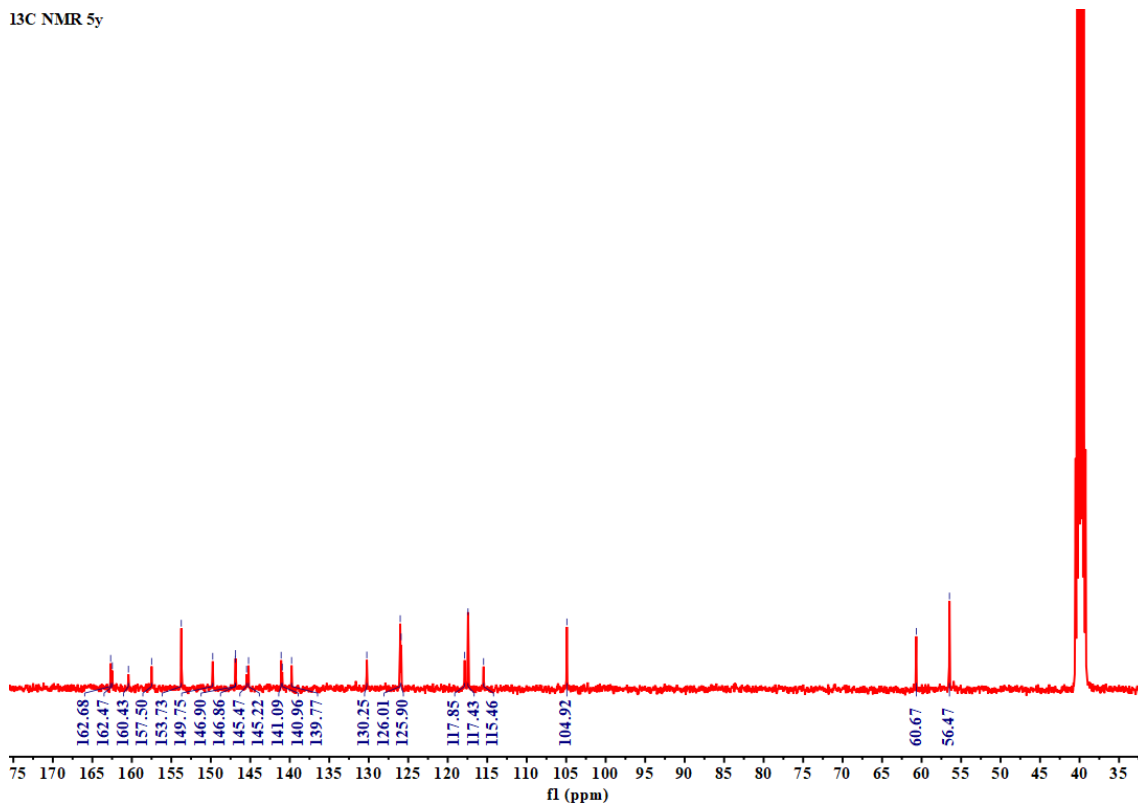

Figure S42: <sup>13</sup>C NMR spectra of 5y



<sup>1</sup>H NMR 5q

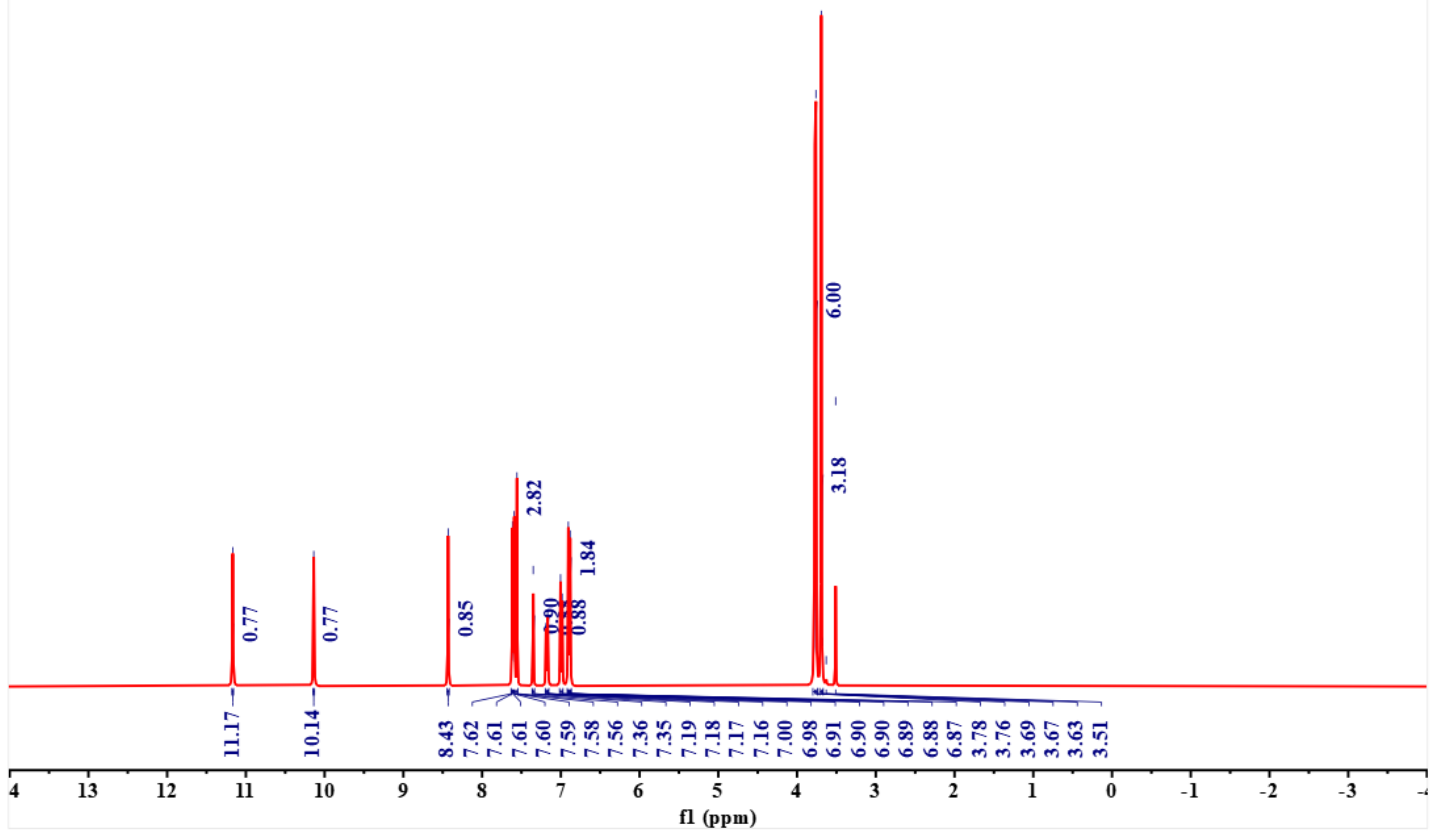

Figure S43: <sup>1</sup>H NMR spectra of 5q

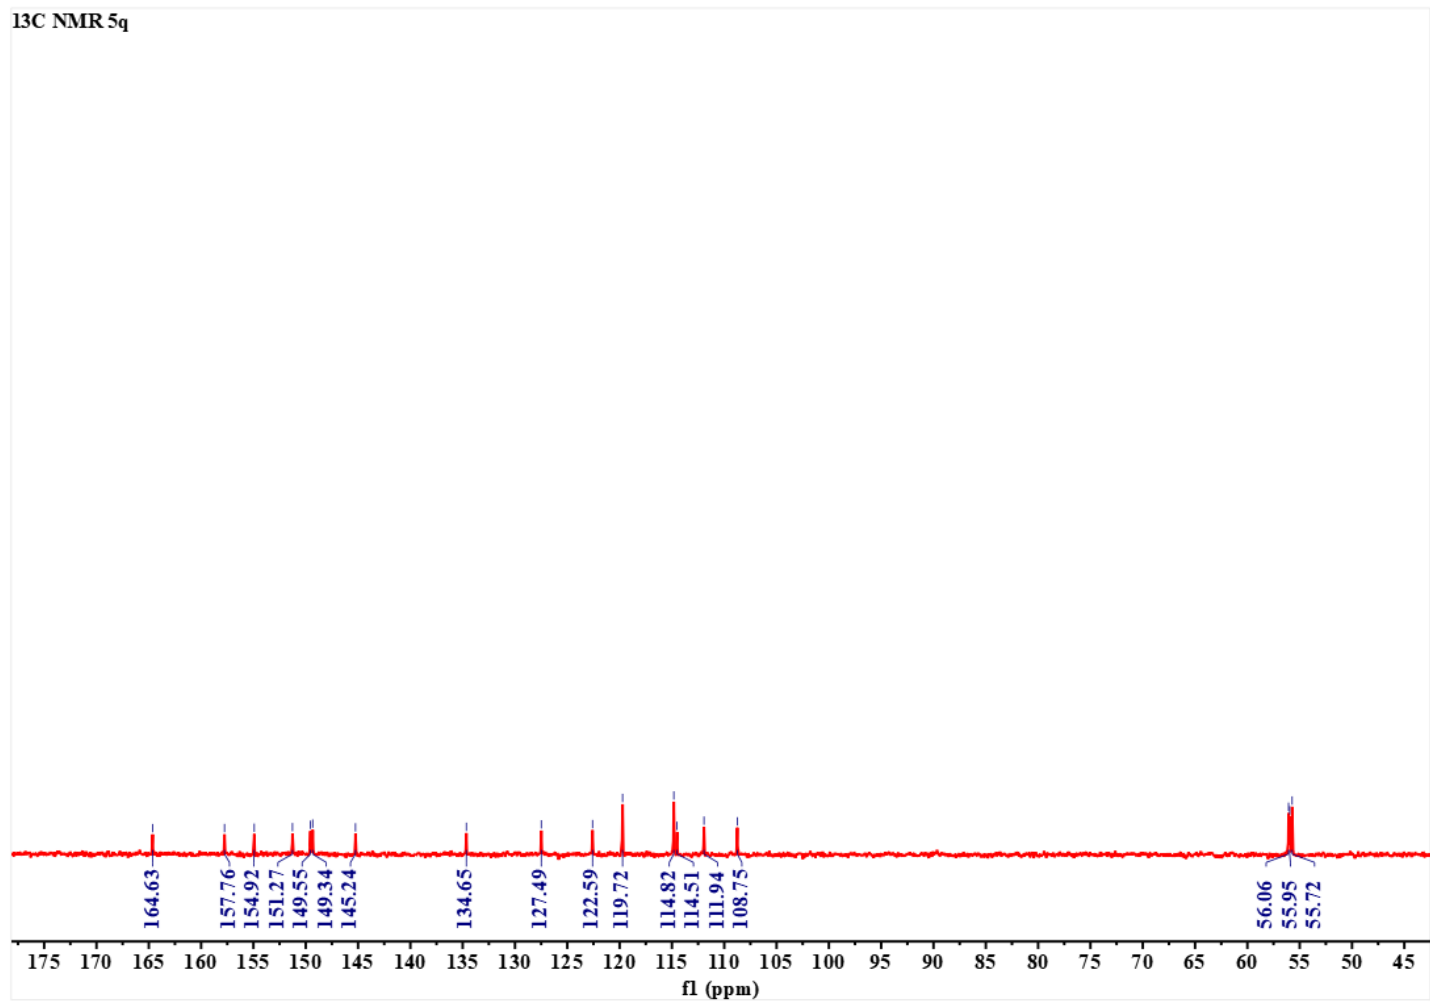

Figure S44: <sup>13</sup>C NMR spectra of 5q

<sup>1</sup>H NMR 5z

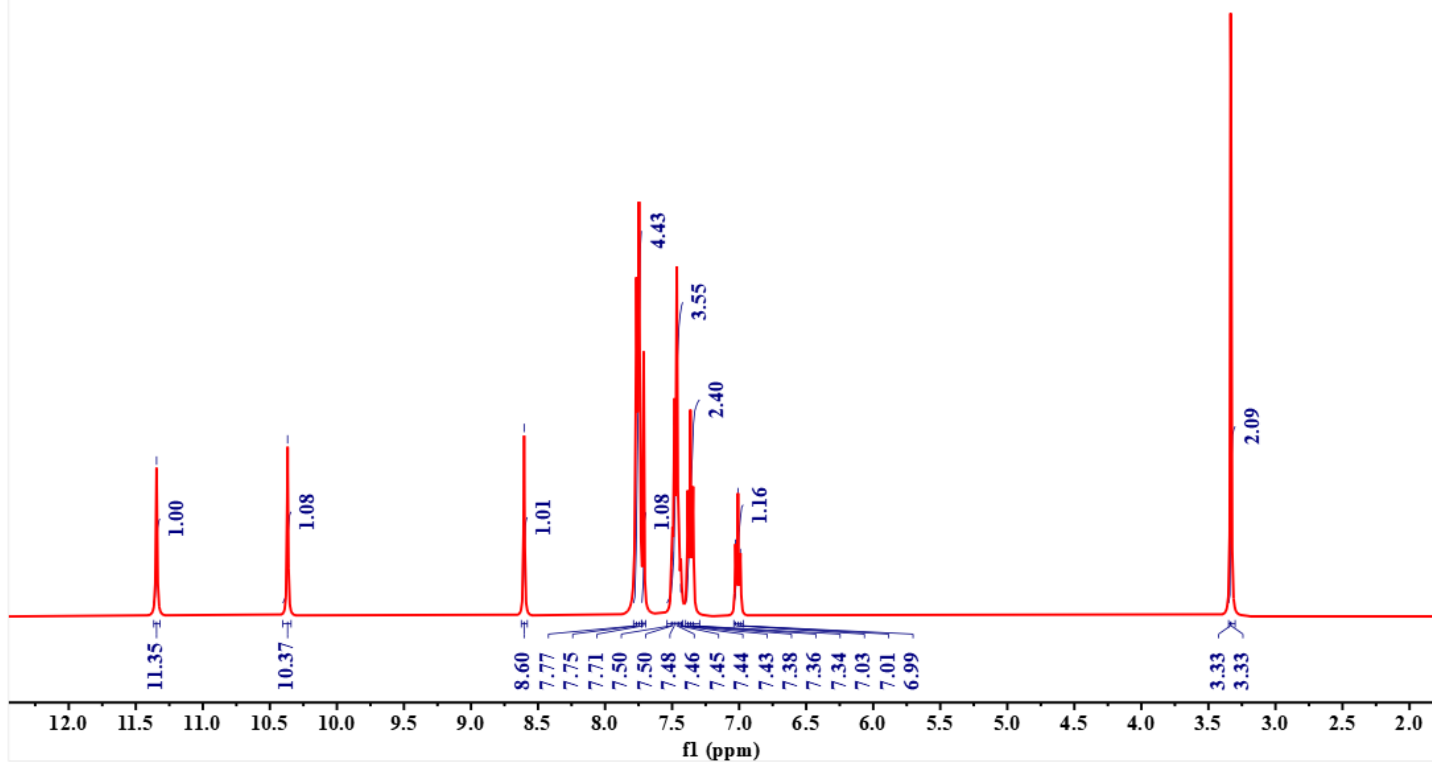

Figure S45: <sup>1</sup>H NMR spectra of 5z

**<sup>13</sup>C NMR 5z**

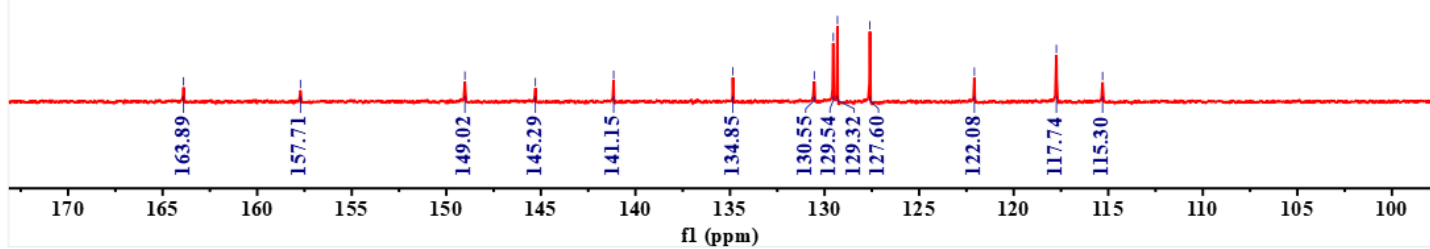

Figure S46: <sup>13</sup>C NMR spectra of 5z

$^1\text{H}$  NMR 5h

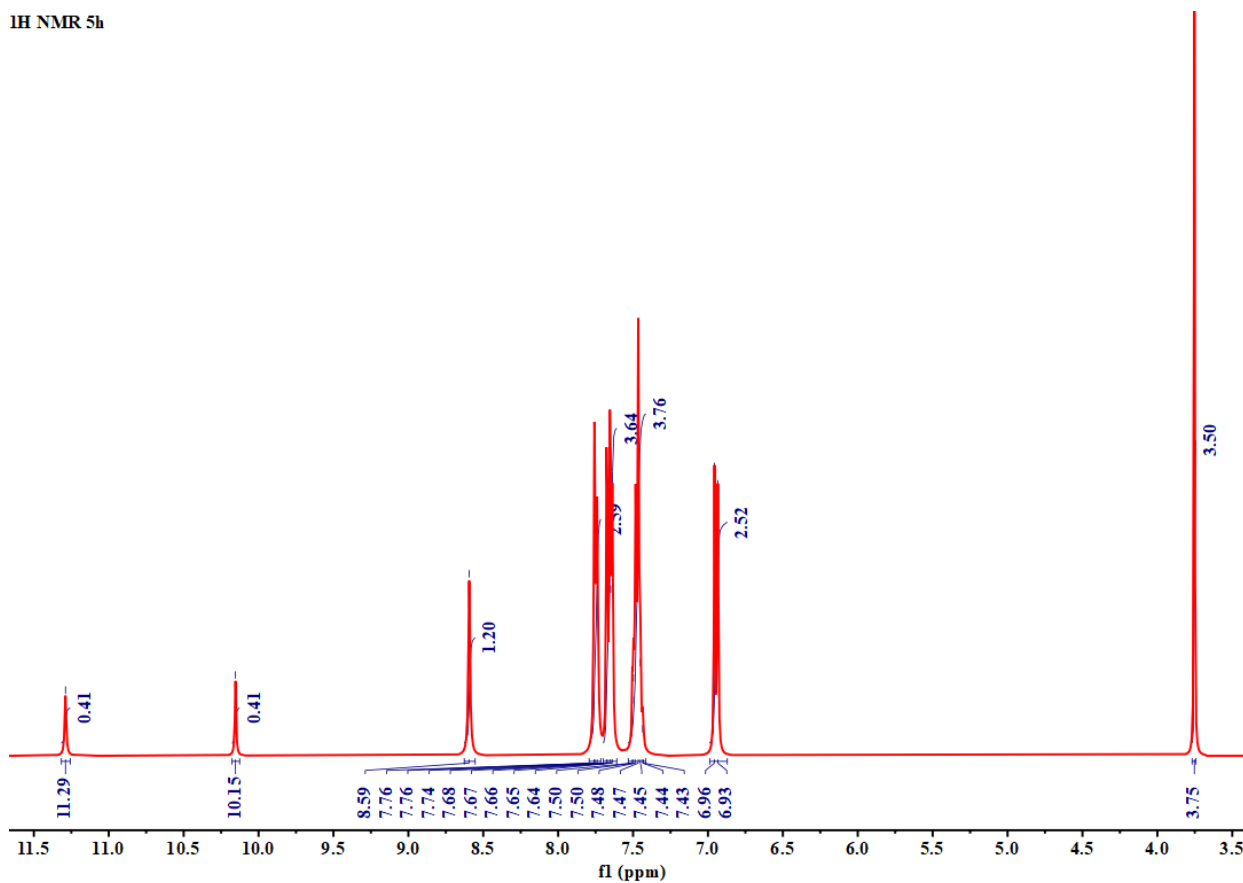

Figure S47:  $^1\text{H}$  NMR spectra of **5h**

$^{13}\text{C}$  NMR 5h

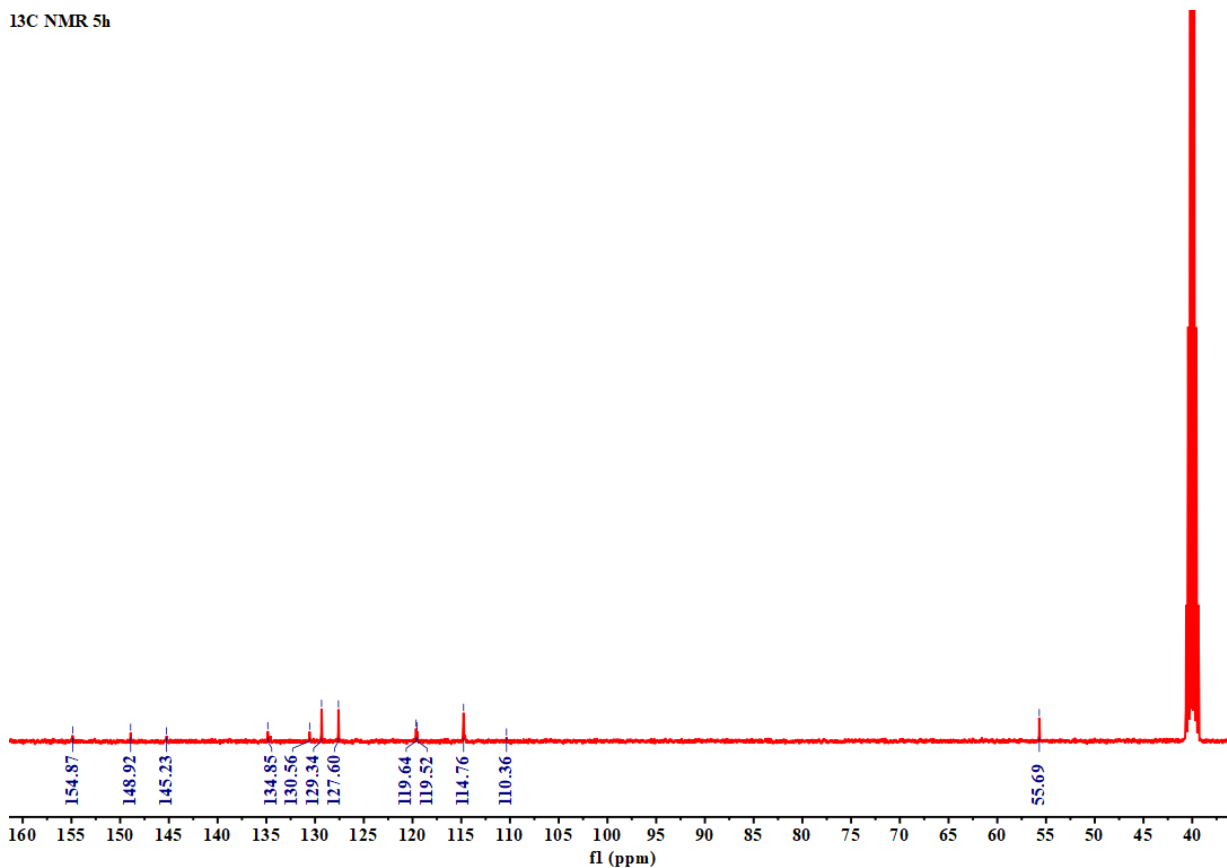

Figure S48:  $^{13}\text{C}$  NMR spectra of **5h**

<sup>1</sup>H NMR 5m

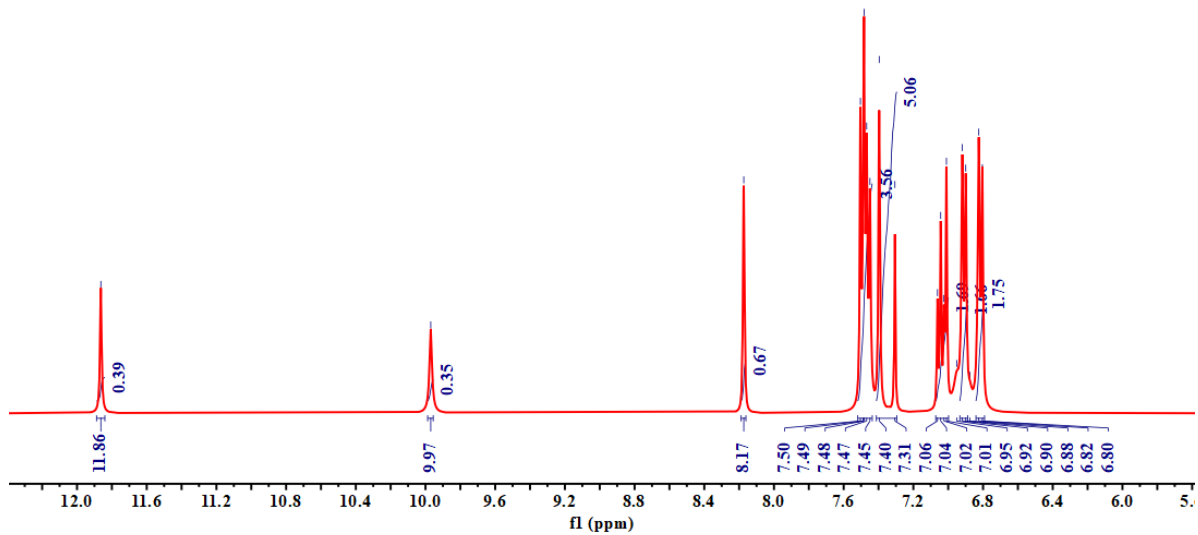

Figure S49: <sup>1</sup>H NMR spectra of 5m

<sup>13</sup>C NMR 5m

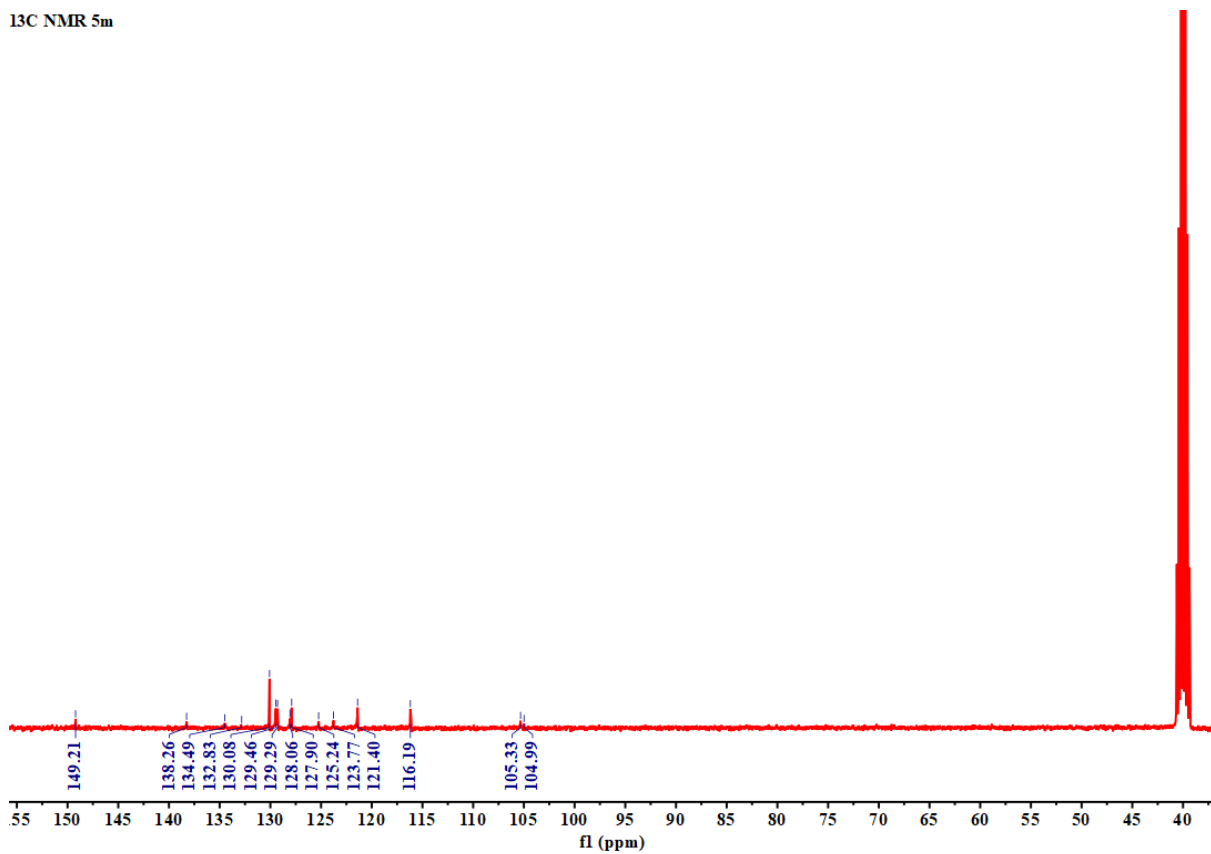

Figure S50: <sup>13</sup>C NMR spectra of 5m

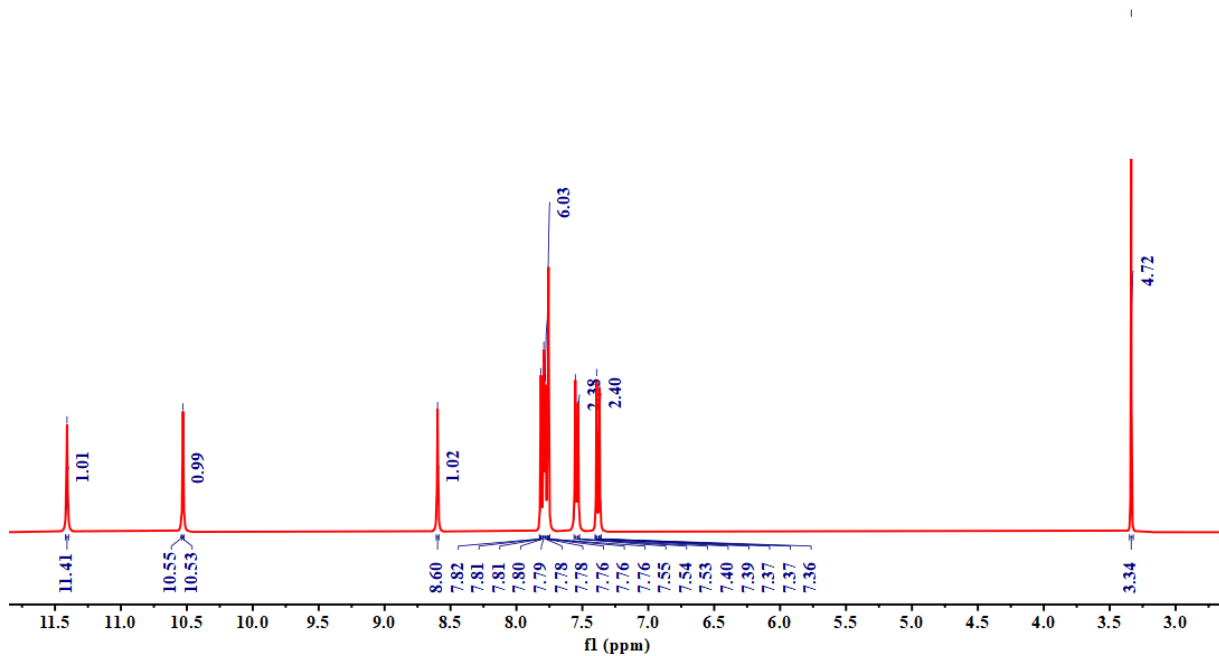

Figure S51: <sup>1</sup>H NMR spectra of 5s

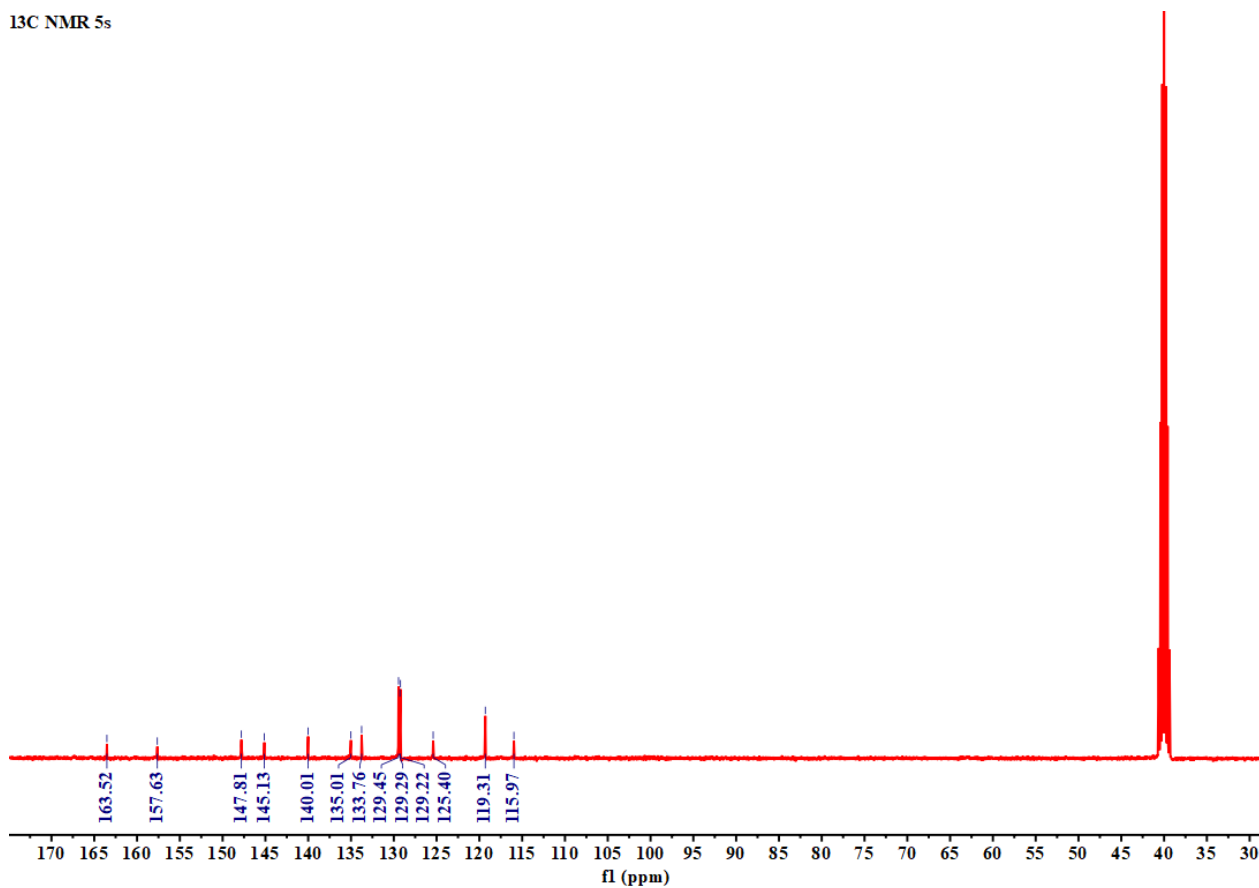

Figure S52: <sup>13</sup>C NMR spectra of 5s

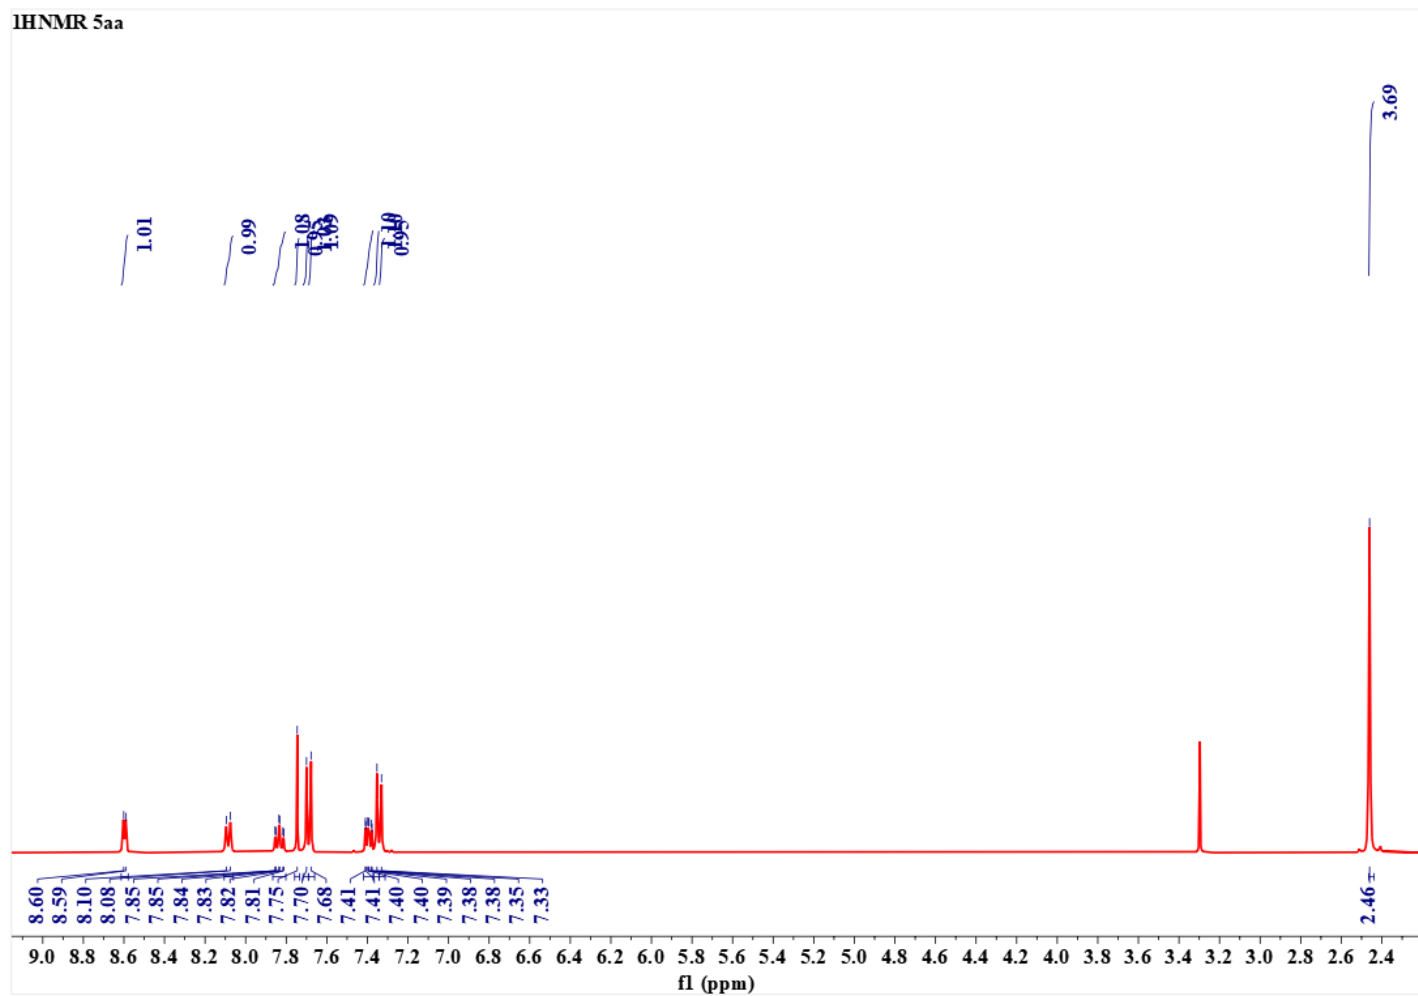

Figure S53: <sup>1</sup>H NMR spectra of 5aa



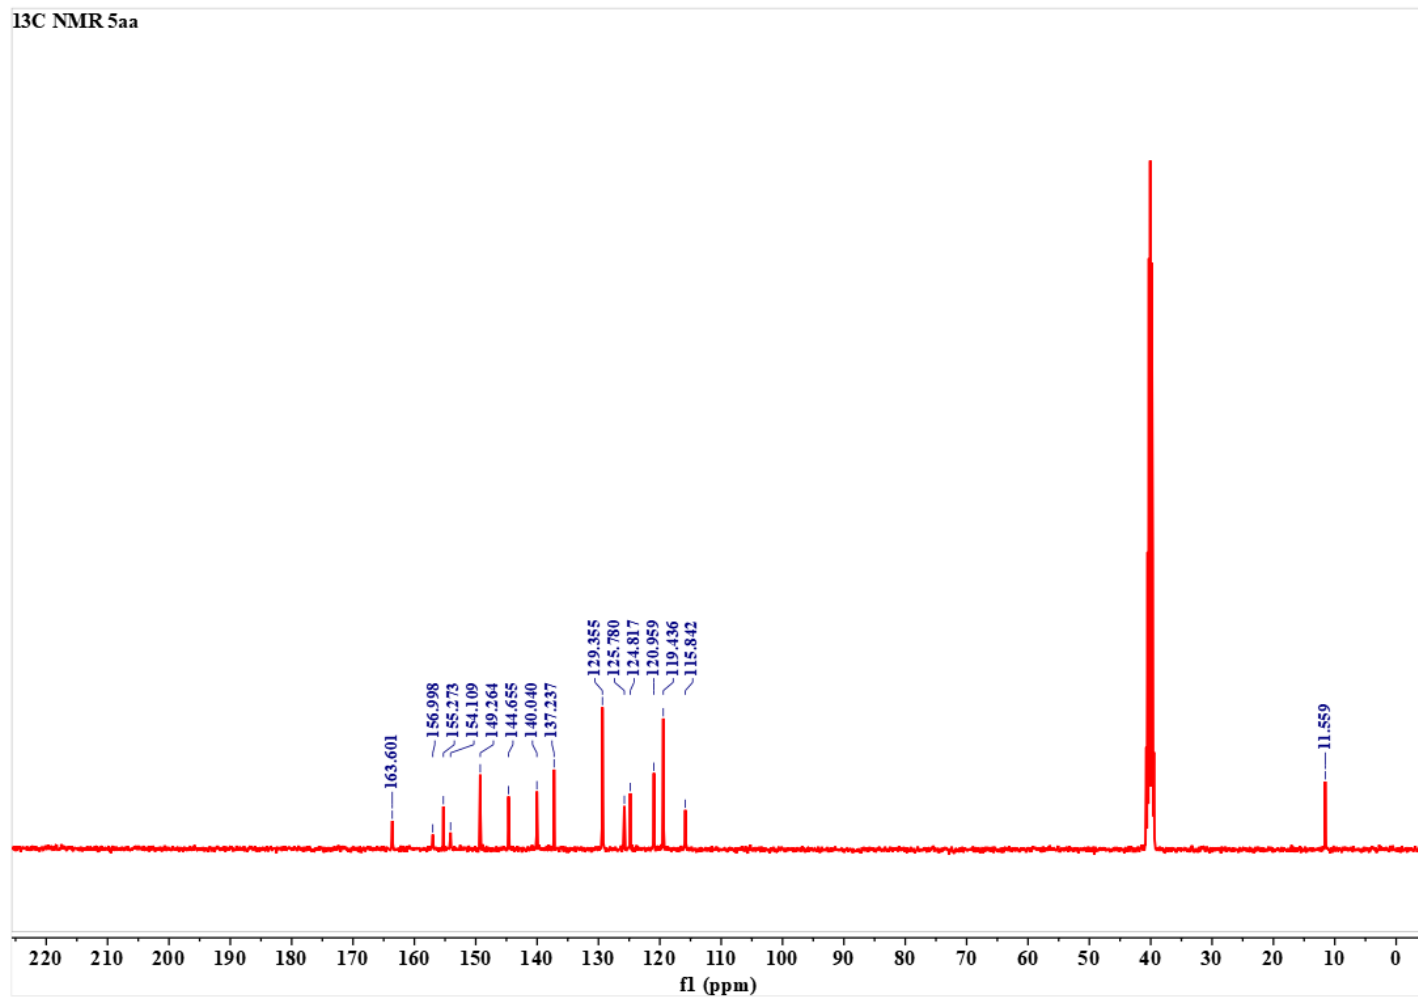

Figure S54: <sup>13</sup>C NMR spectra of 5aa

2D NMR

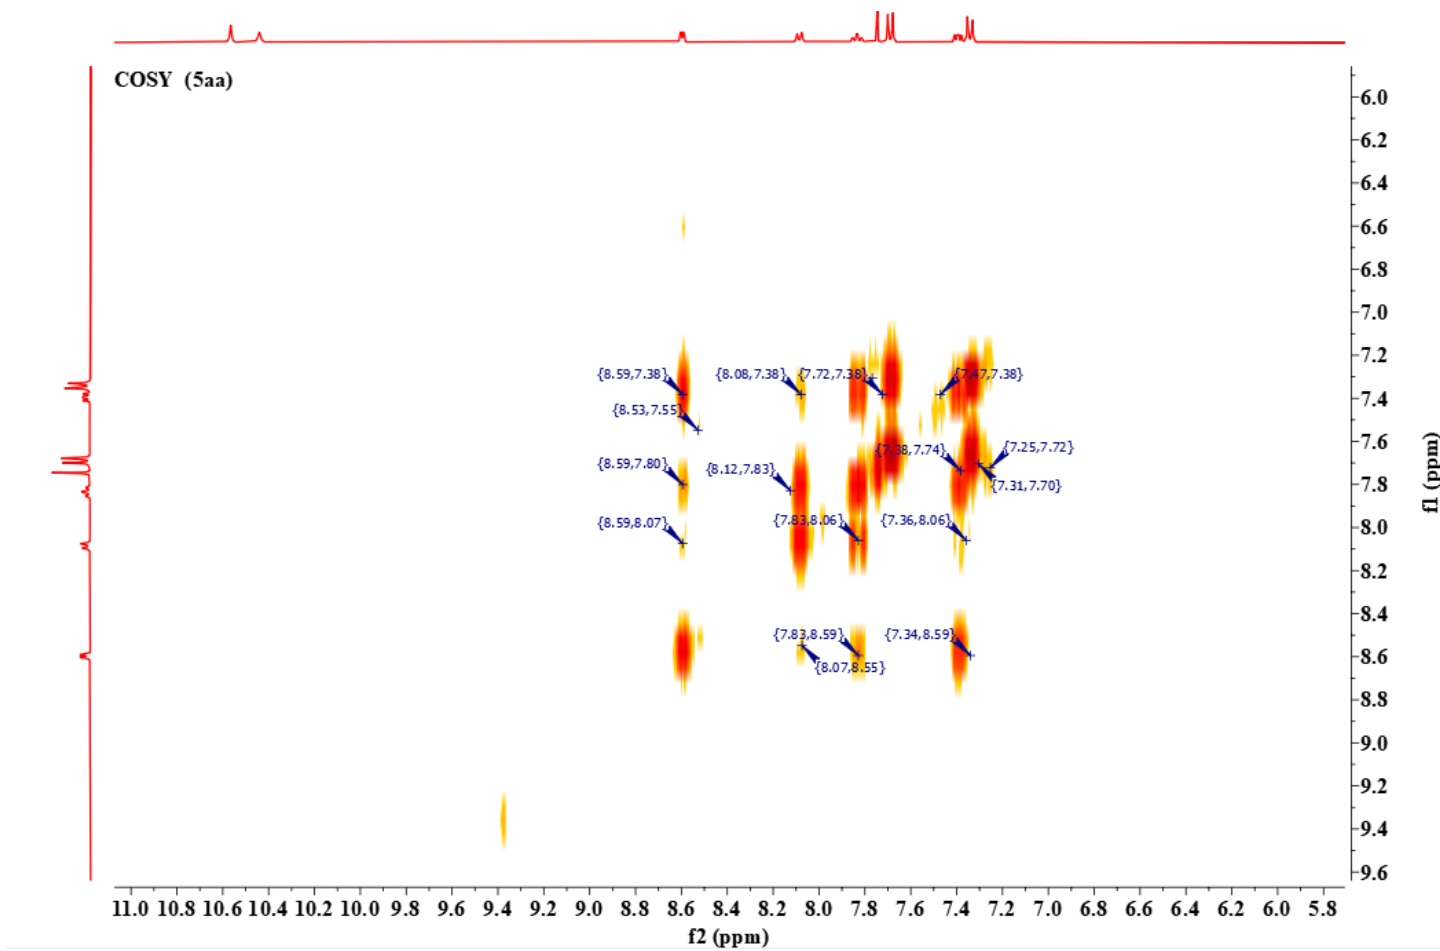

Figure S55: COSY correlation of 5aa

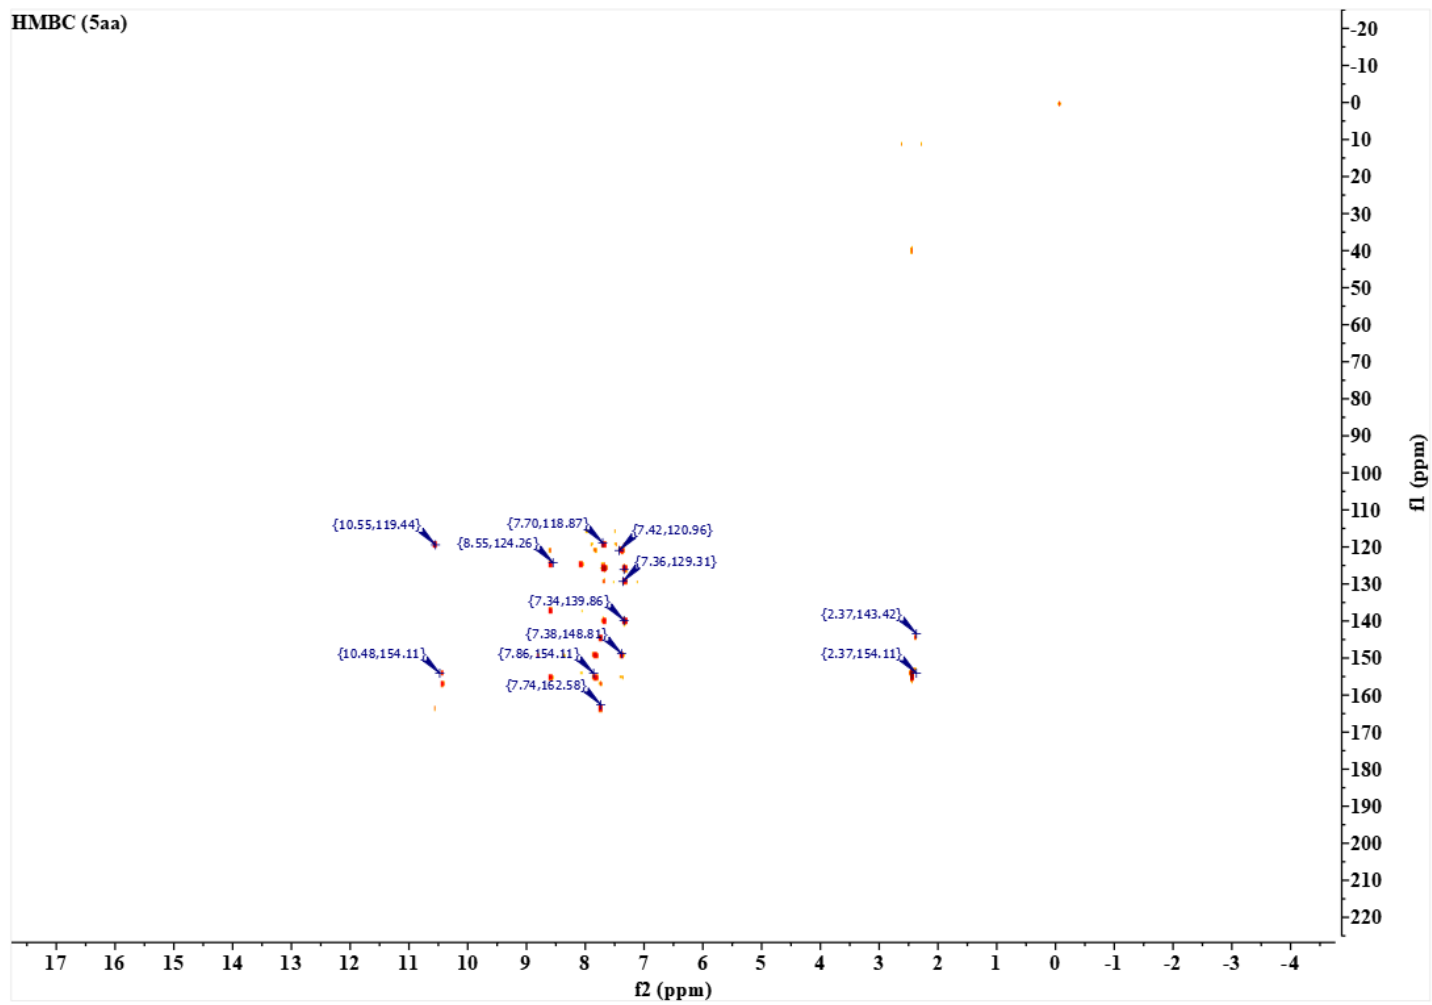

Figure S56: HMBC correlation of **5aa**

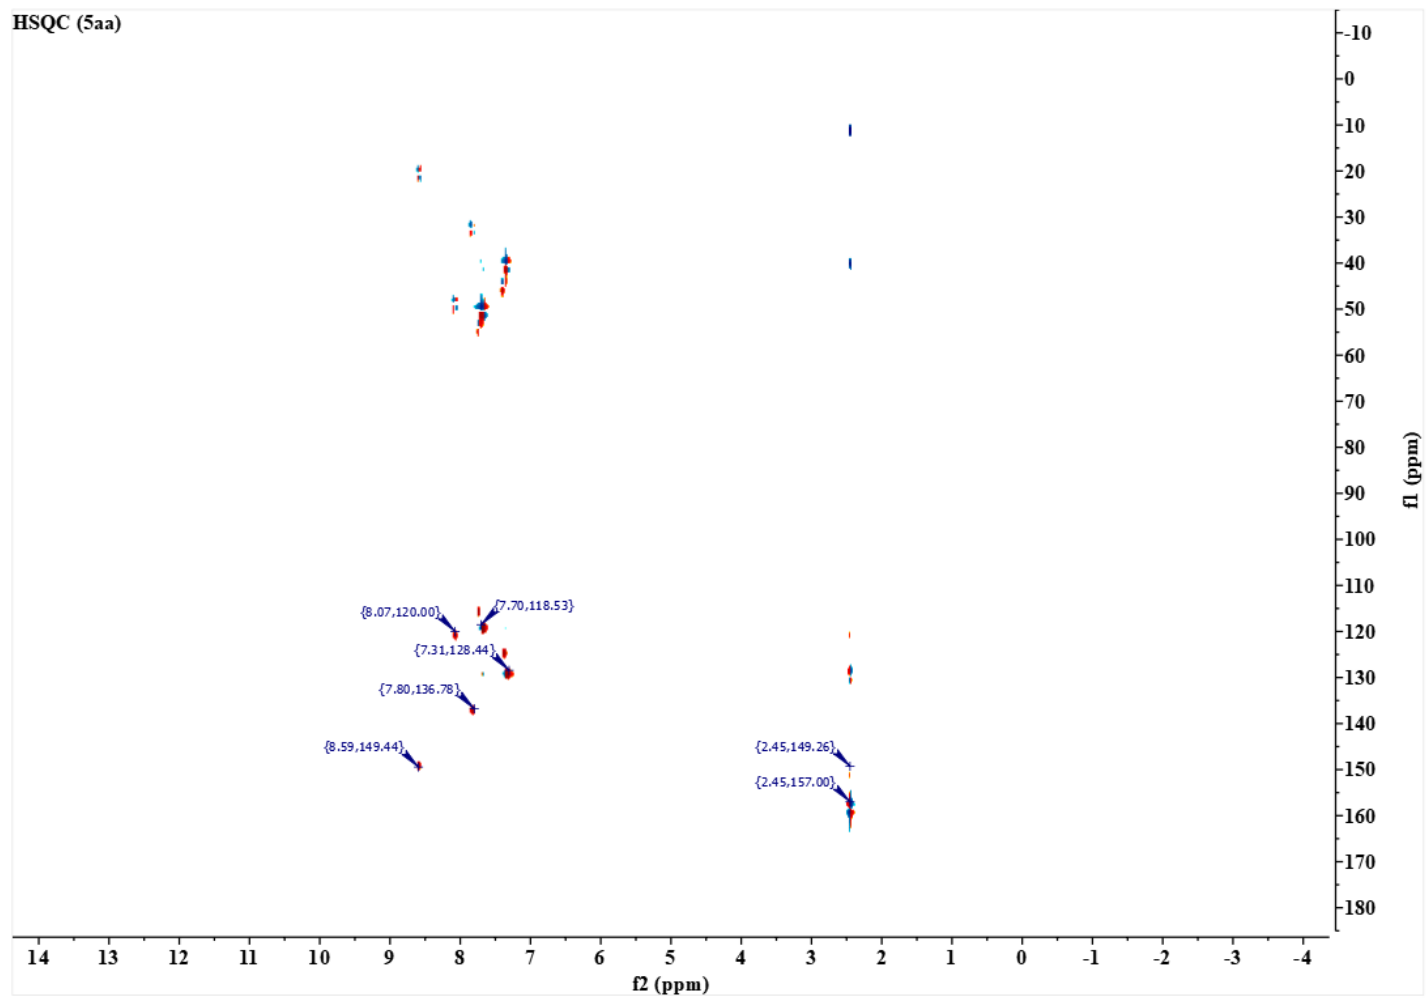

Figure S57: HSQC correlation of **5aa**

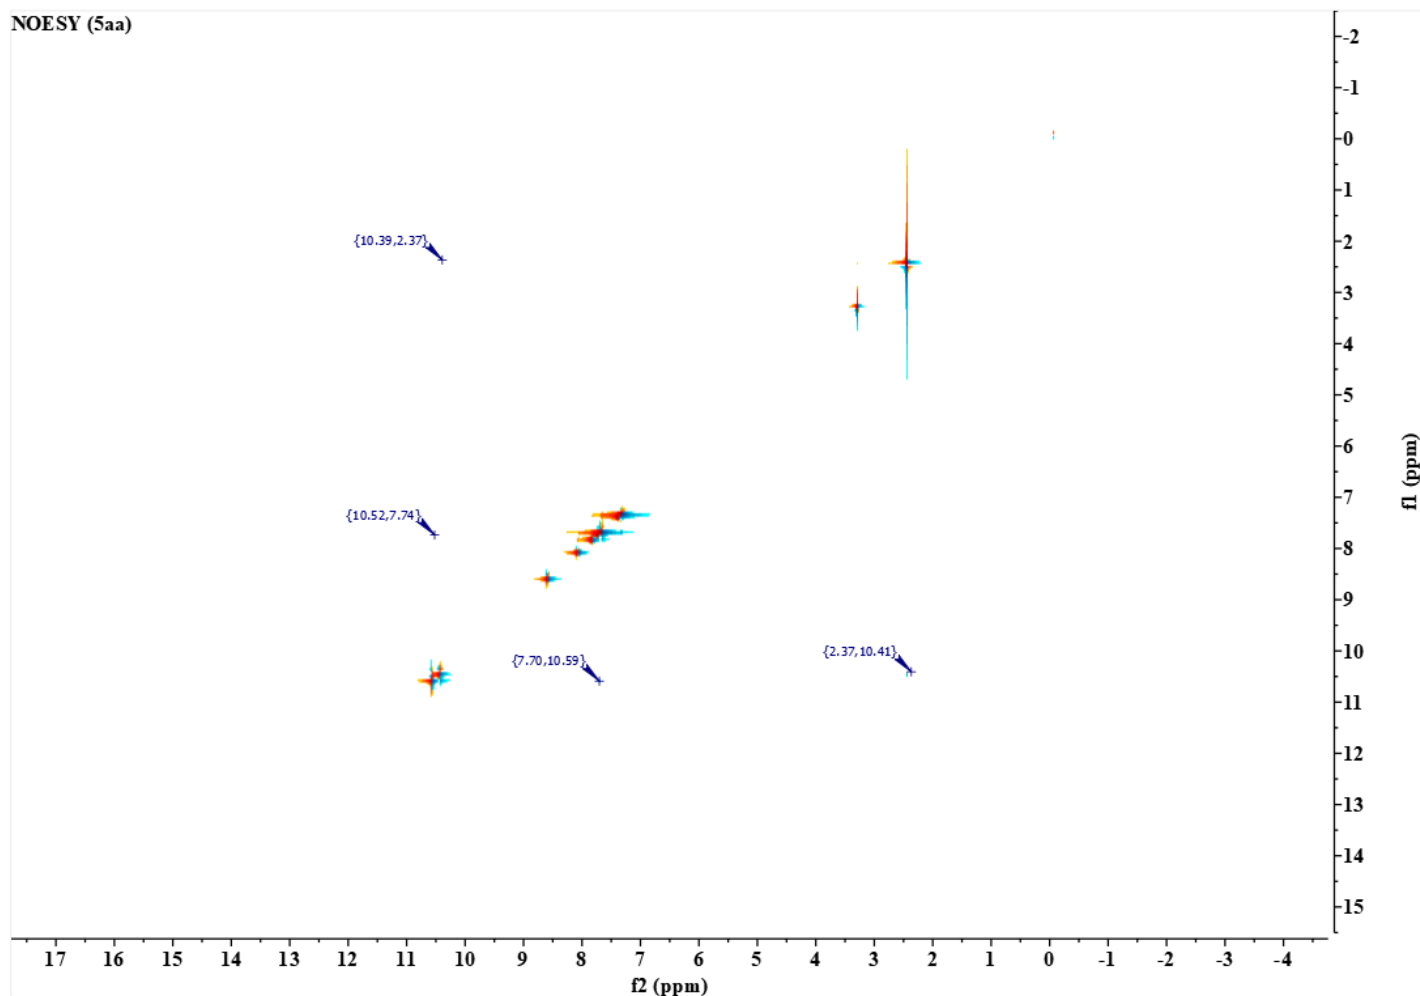

Figure S58: NOESY correlation of **5aa**

### IR Data

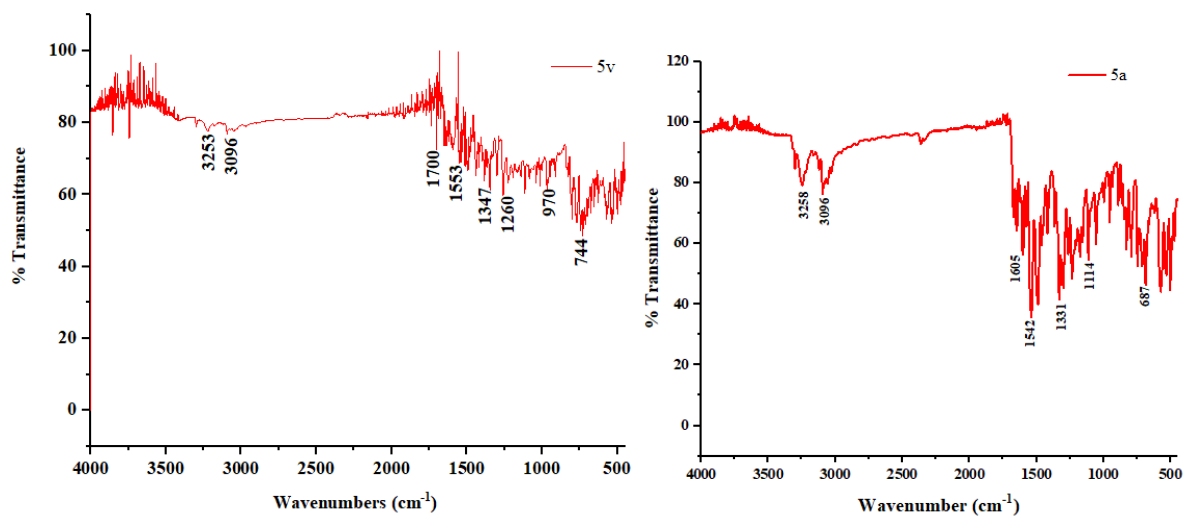

Figure S59: IR spectra of **5v** and **5a**

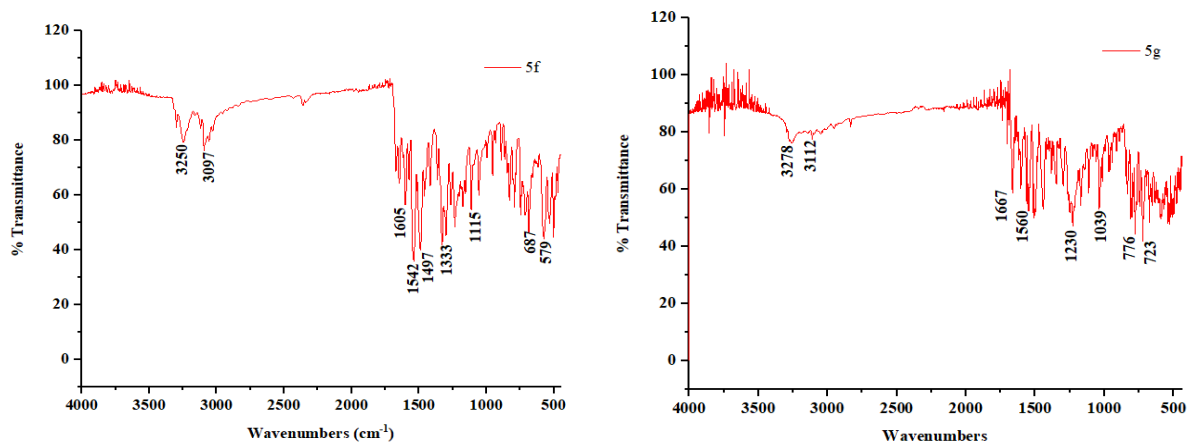

Figure S60: IR spectra of **5f** and **5g**

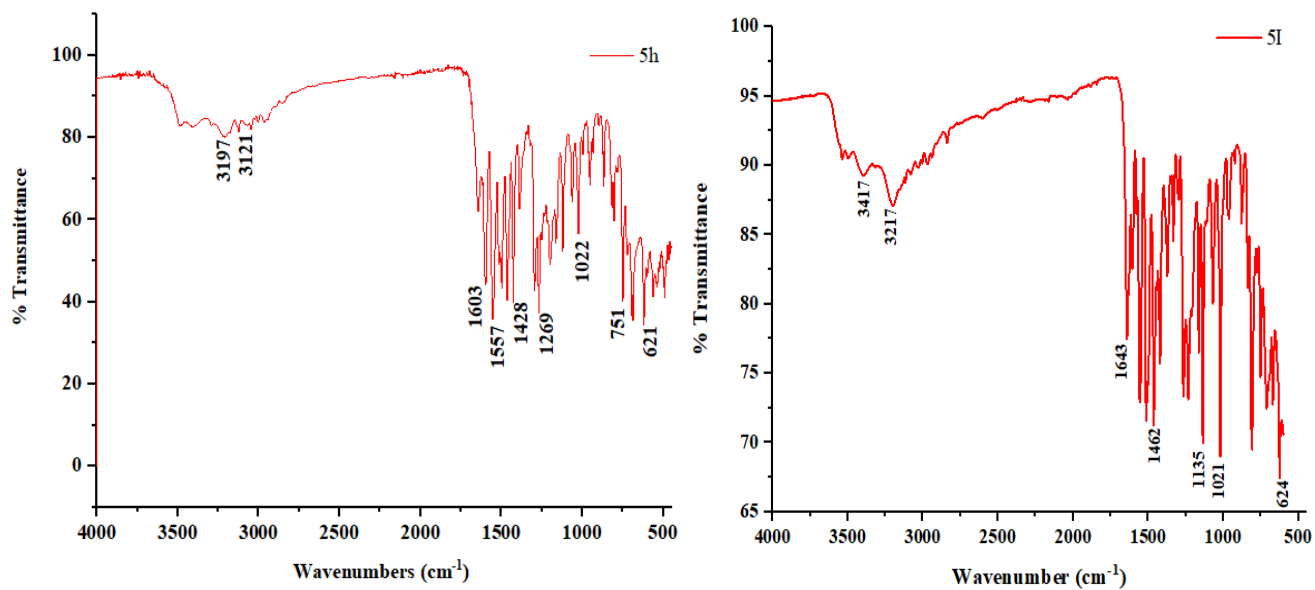

Figure S61: IR spectra of **5h** and **5l**

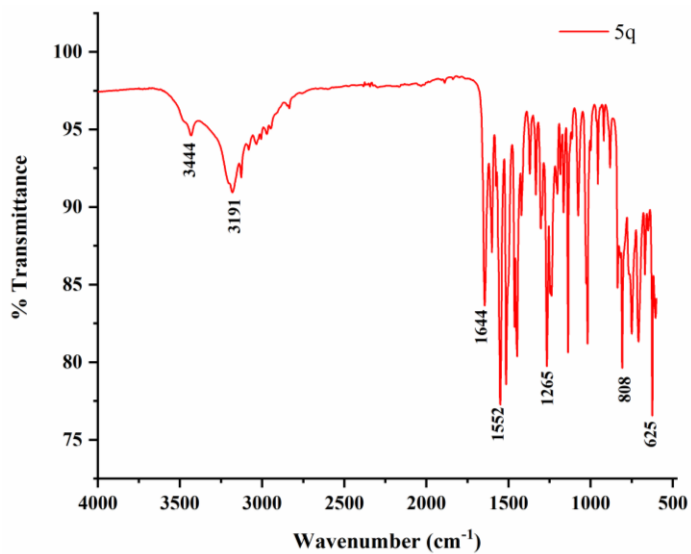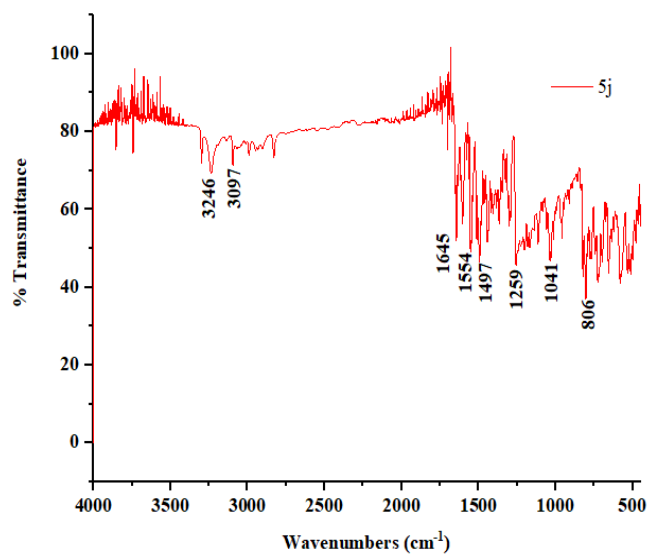

Figure S62: IR spectra of **5q** and **5j**

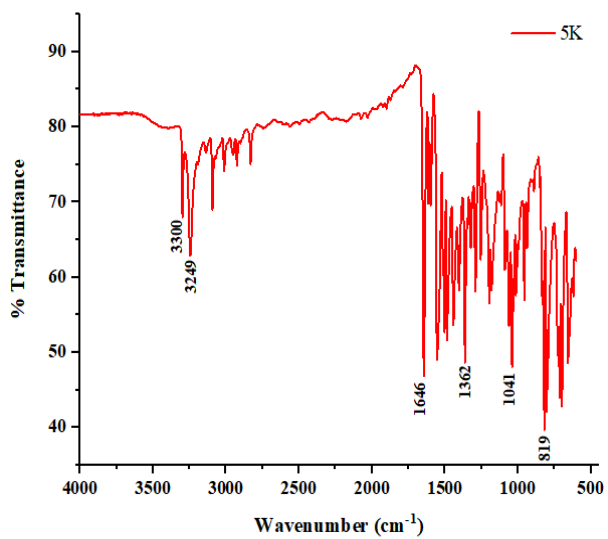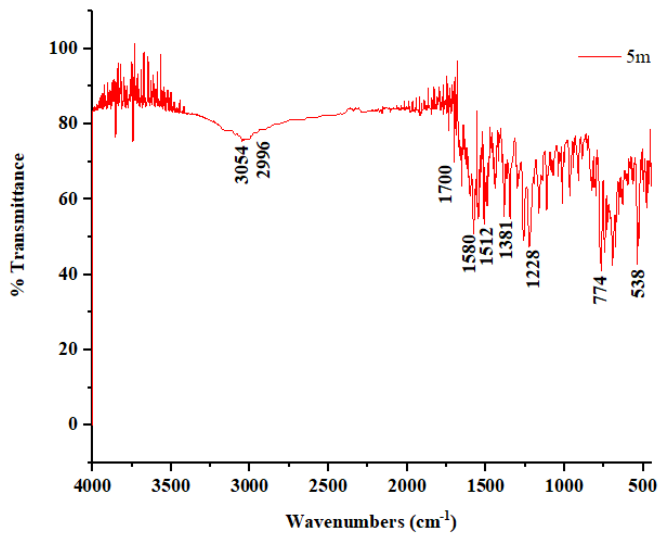

Figure S63: IR spectra of **5k** and **5m**

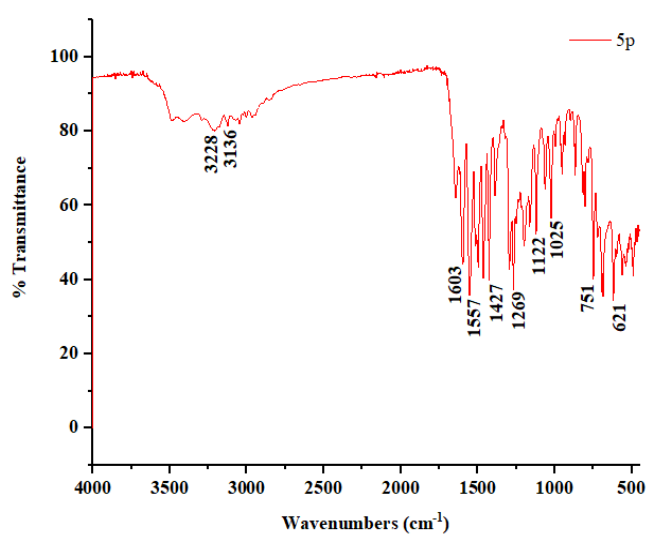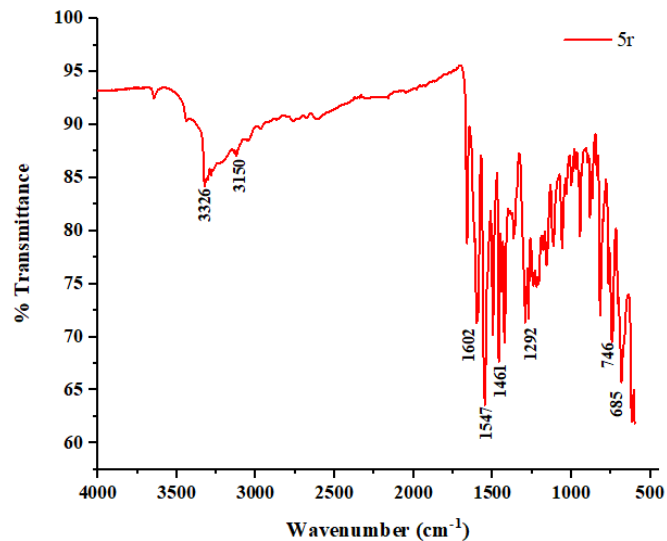

Figure S64: IR spectra of **5p** and **5r**

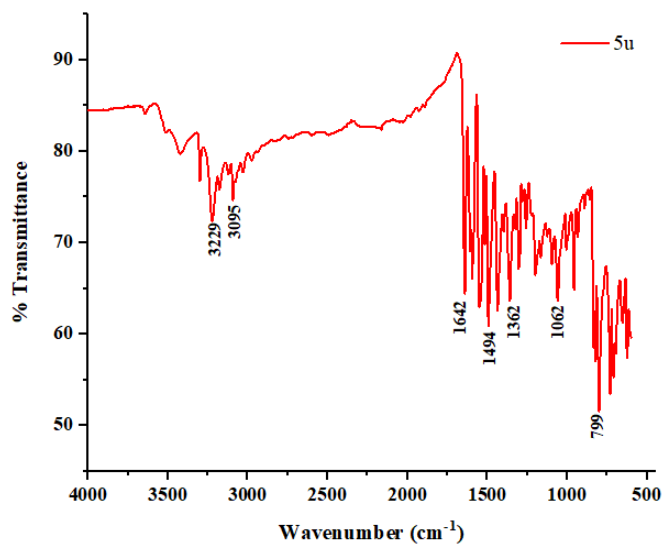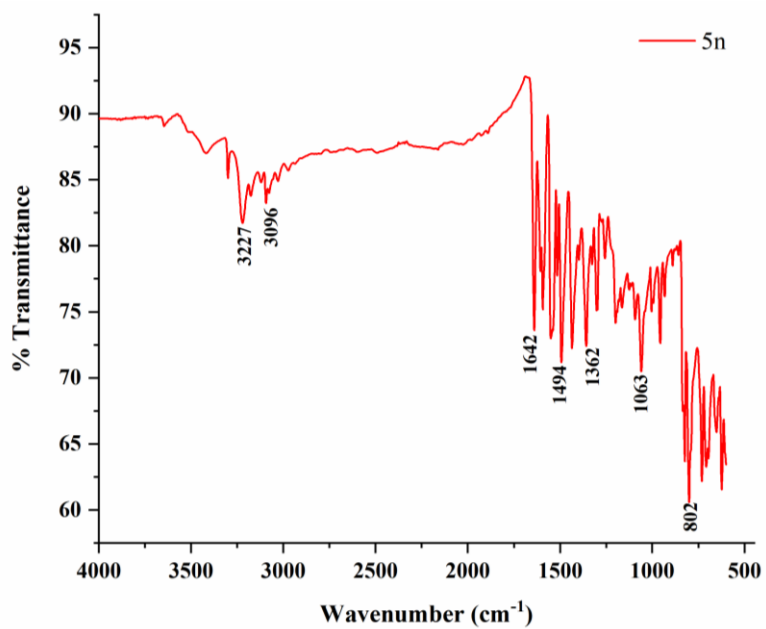

Figure S65: IR spectra of **5u** and **5n**



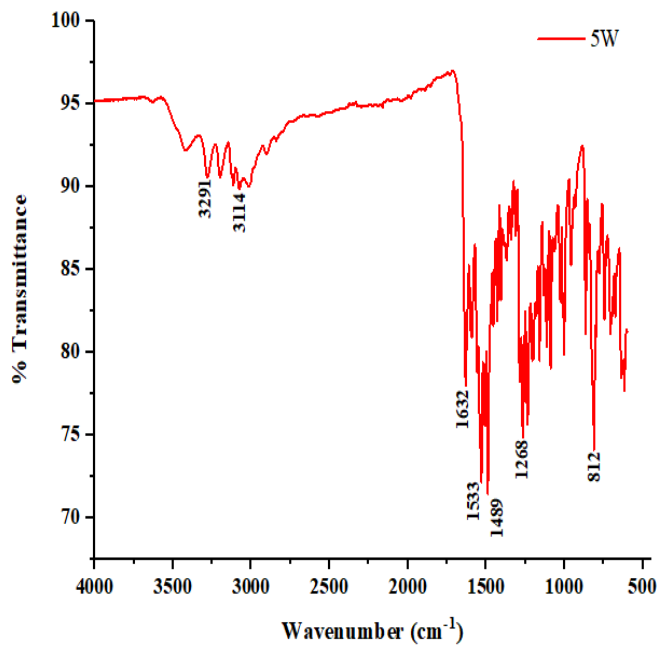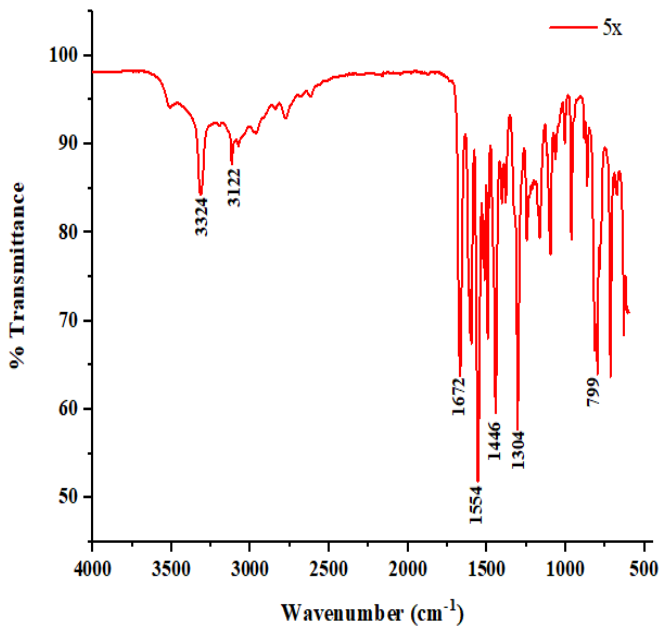

Figure S66: IR spectra of 5w and 5x

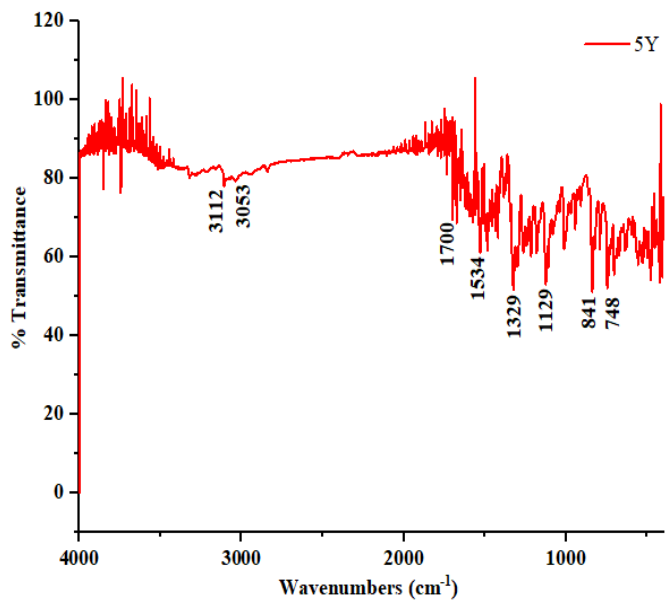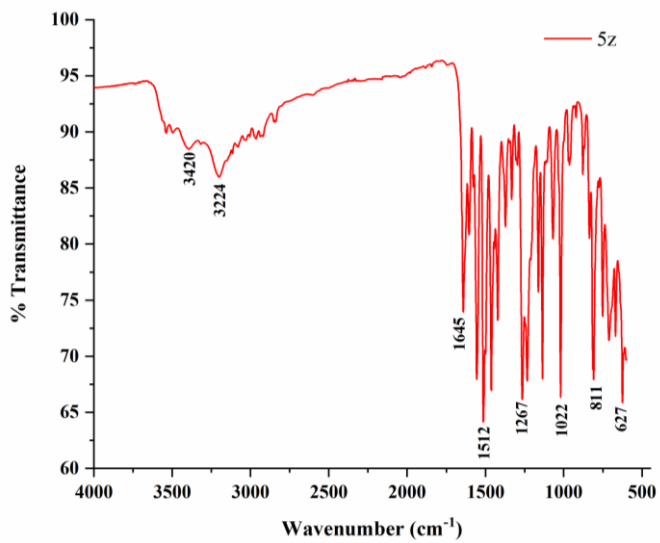

Figure S67: IR spectra of 5y and 5z

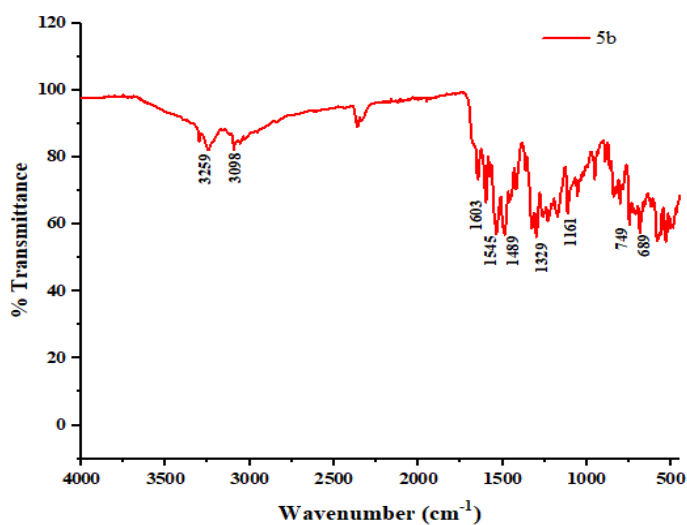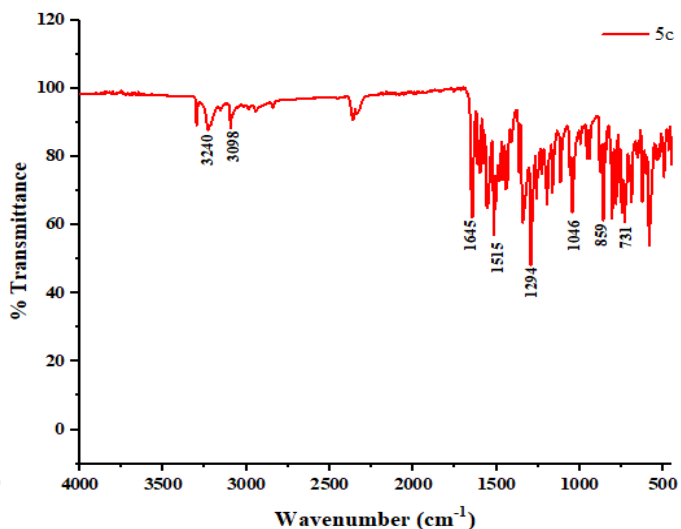

Figure S68: IR spectra of **5b** and **5c**

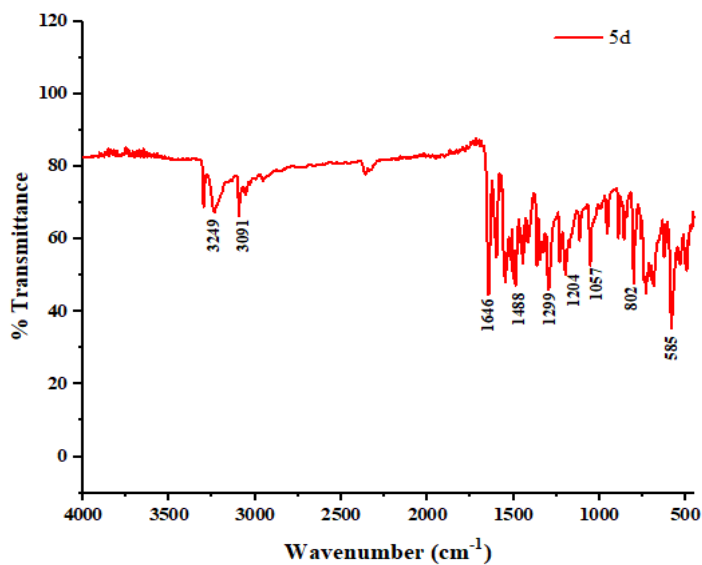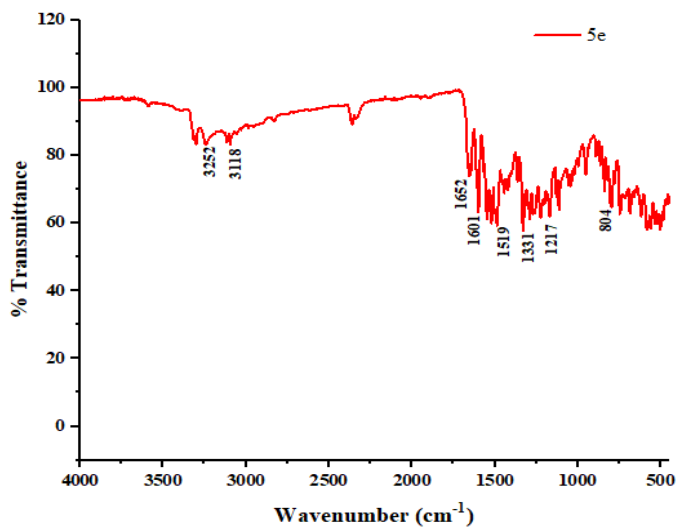

Figure S69: IR spectra of **5d** and **5e**

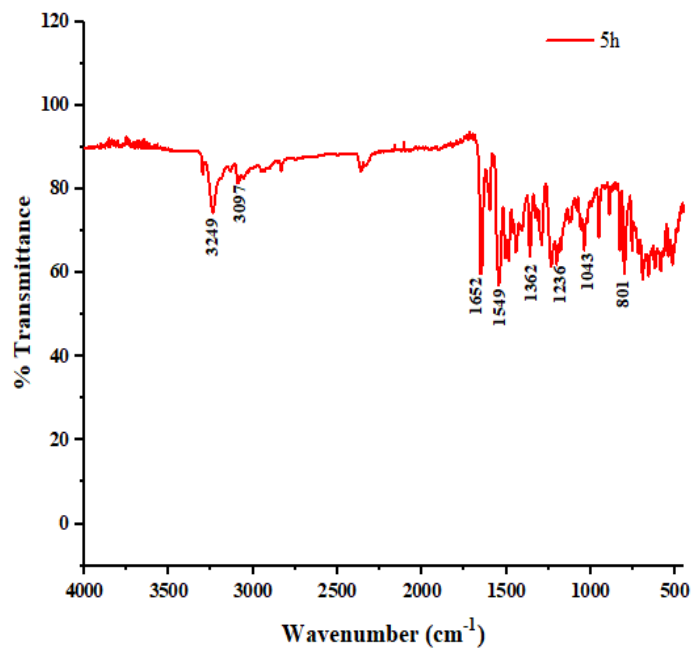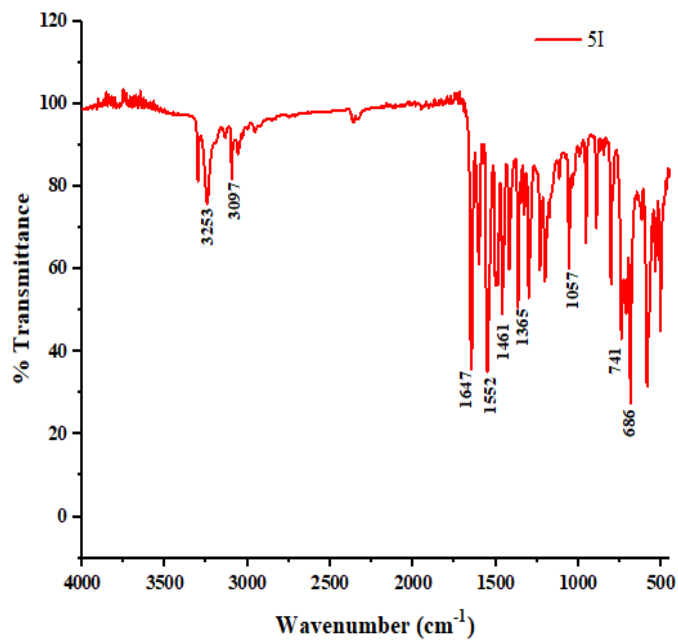

Figure S70: IR spectra of **5h** and **5l**

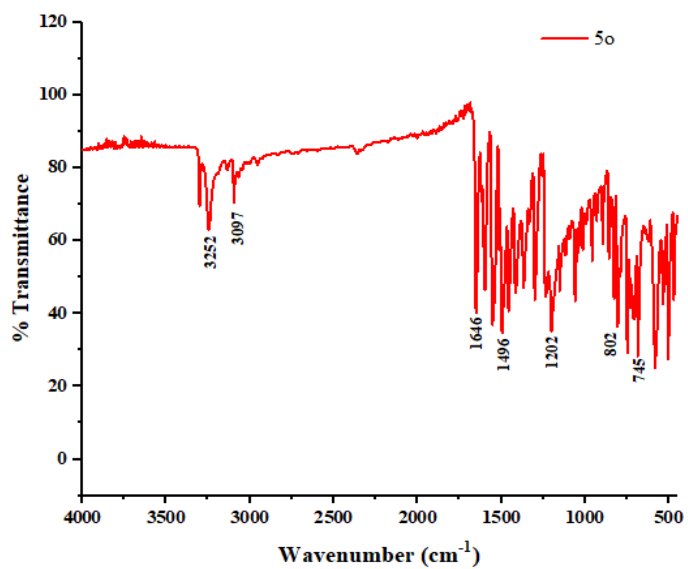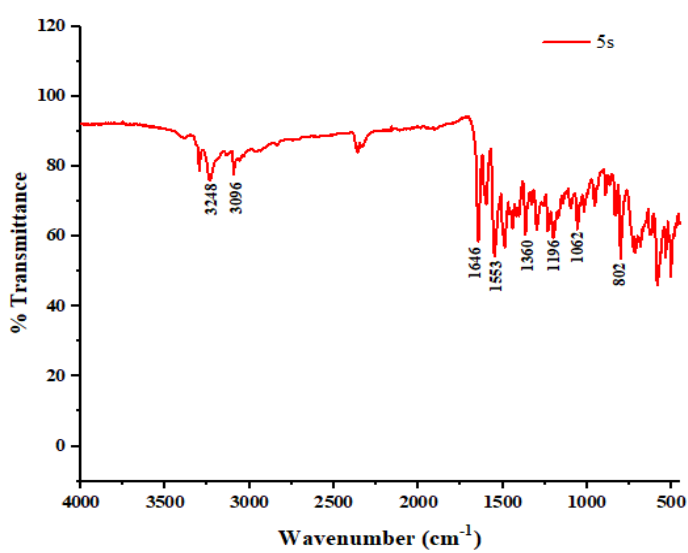

Figure S71: IR spectra of **5o** and **5s**

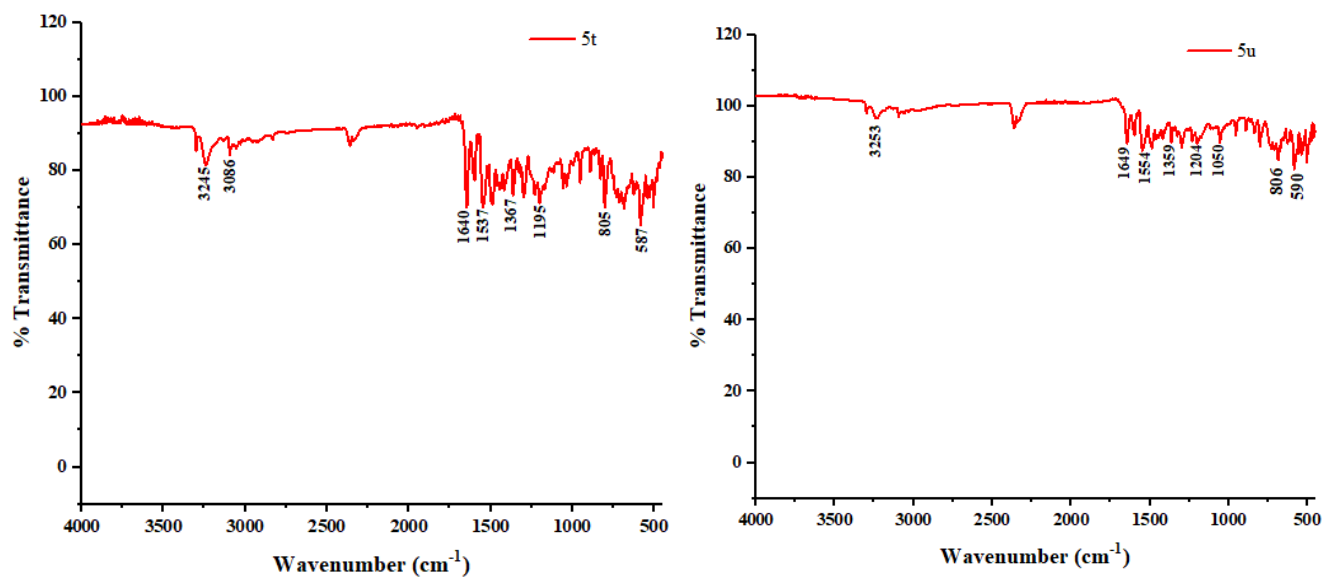

Figure S72: IR spectra of **5t** and **5u**

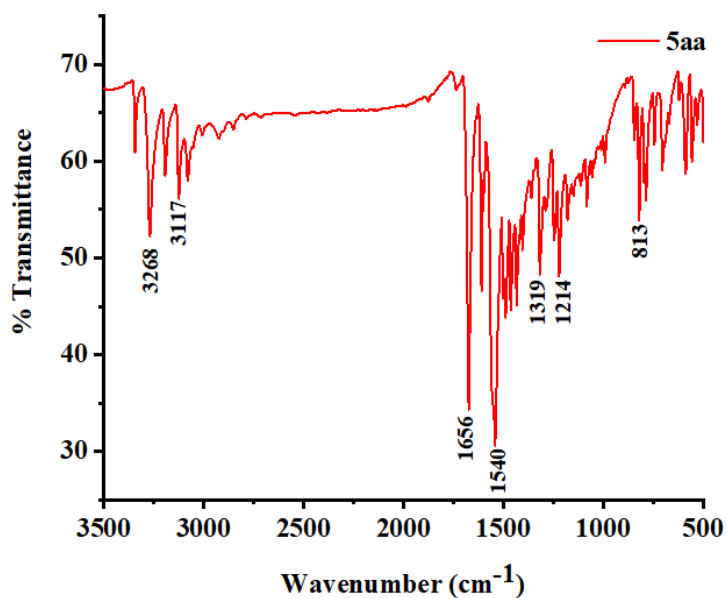

Figure S73: IR spectra of **5aa**

Table S2: Bond Lengths for **5aa**

| Bond Lengths for <b>5aa</b> |      |          |      |      |          |
|-----------------------------|------|----------|------|------|----------|
| Atom                        | Atom | Length/Å | Atom | Atom | Length/Å |
| S                           | C7   | 1.746(3) | N1   | C17  | 1.327(4) |
| S                           | C8   | 1.715(3) | C9   | C10  | 1.484(3) |
| Cl                          | C4   | 1.741(3) | C1   | C2   | 1.396(3) |
| O                           | C10  | 1.217(3) | C1   | C6   | 1.390(3) |
| N3                          | N2   | 1.368(3) | C13  | C14  | 1.381(4) |
| N3                          | C10  | 1.348(3) | C8   | C9   | 1.341(3) |

|     |     |          |     |     |          |
|-----|-----|----------|-----|-----|----------|
| N4  | C7  | 1.303(3) | C2  | C3  | 1.365(4) |
| N4  | C9  | 1.381(3) | C3  | C4  | 1.376(4) |
| N5  | C1  | 1.402(3) | C6  | C5  | 1.374(4) |
| N5  | C7  | 1.359(3) | C4  | C5  | 1.375(4) |
| N2  | C11 | 1.286(3) | C14 | C15 | 1.375(4) |
| C11 | C13 | 1.479(3) | C15 | C16 | 1.361(5) |
| C11 | C12 | 1.494(4) | C16 | C17 | 1.364(5) |
| N1  | C13 | 1.329(3) |     |     |          |

Table S3: Crystal data and structure refinement parameters for **5b**

| Identification code                         | Data                                                          |
|---------------------------------------------|---------------------------------------------------------------|
| Empirical formula                           | C <sub>17</sub> H <sub>13</sub> ClN <sub>5</sub> OS           |
| Formula weight                              | 370.83                                                        |
| Temperature/K                               | 293(2)                                                        |
| Crystal system                              | monoclinic                                                    |
| Space group                                 | P2 <sub>1</sub> /c                                            |
| a/Å                                         | 11.5221(5)                                                    |
| b/Å                                         | 15.2245(7)                                                    |
| c/Å                                         | 10.1523(5)                                                    |
| α/°                                         | 90                                                            |
| β/°                                         | 105.553(5)                                                    |
| γ/°                                         | 90                                                            |
| Volume/Å <sup>3</sup>                       | 1715.69(15)                                                   |
| Z                                           | 4                                                             |
| ρ <sub>calc</sub> /g/cm <sup>3</sup>        | 1.436                                                         |
| μ/mm <sup>-1</sup>                          | 0.360                                                         |
| F(000)                                      | 764.0                                                         |
| Radiation                                   | MoK <sub>α</sub> (λ = 0.71073)                                |
| 2θ range for data collection/°              | 6.49 to 54.746                                                |
| Index ranges                                | -14 ≤ h ≤ 14, -18 ≤ k ≤ 18, -12 ≤ l ≤ 12                      |
| Reflections collected                       | 14897                                                         |
| Independent reflections                     | 3646 [R <sub>int</sub> = 0.0554, R <sub>sigma</sub> = 0.0443] |
| Data/restraints/parameters                  | 3646/0/227                                                    |
| Goodness-of-fit on F <sup>2</sup>           | 1.050                                                         |
| Final R indexes [I >= 2σ (I)]               | R <sub>1</sub> = 0.0526, wR <sub>2</sub> = 0.1369             |
| Final R indexes [all data]                  | R <sub>1</sub> = 0.0902, wR <sub>2</sub> = 0.1613             |
| Largest diff. peak/hole / e Å <sup>-3</sup> | 0.44/-0.26                                                    |

**BSA and alpha amylase Plots:**

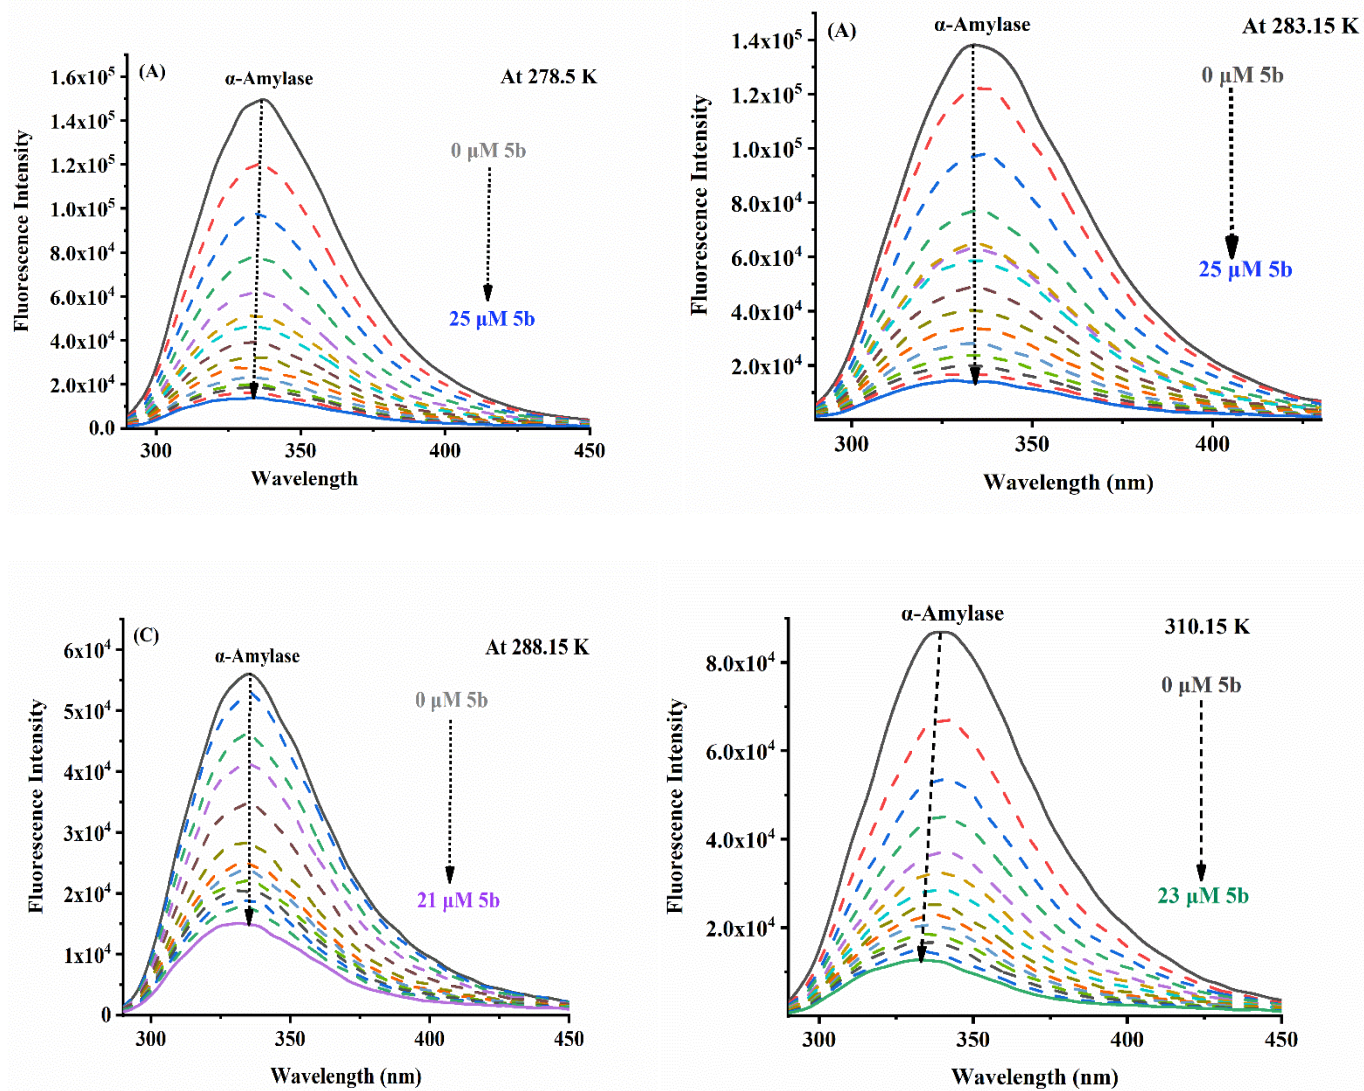

Figure S74: Fluorescence spectra of  $\alpha$ -amylase titration with **5b** at different temperature such as 278.15 K, 283.15 K, 288.15 K, 310.15 K.

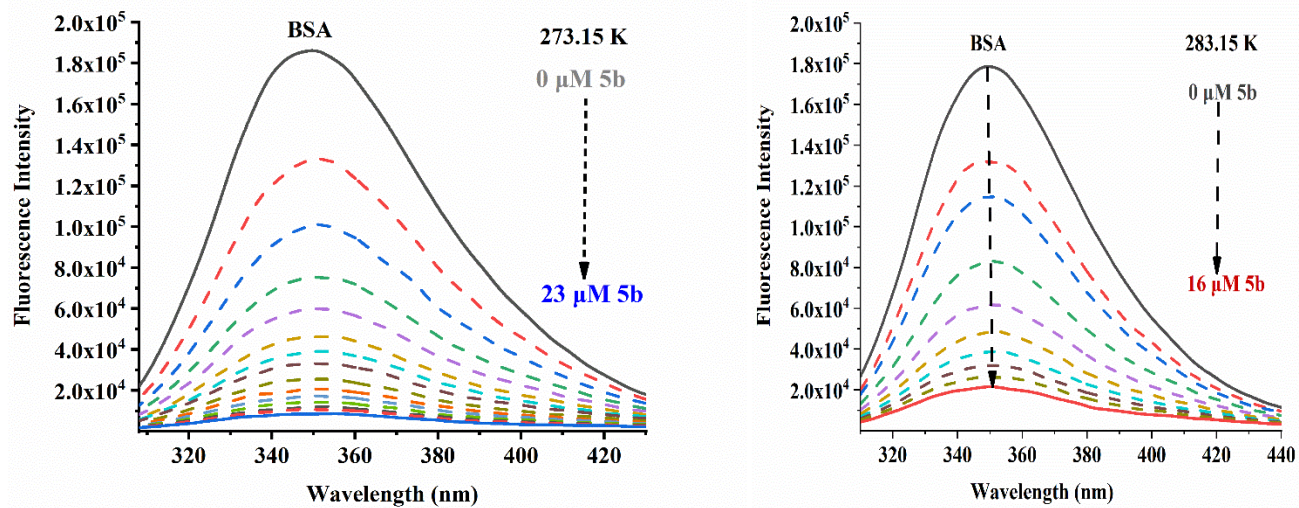



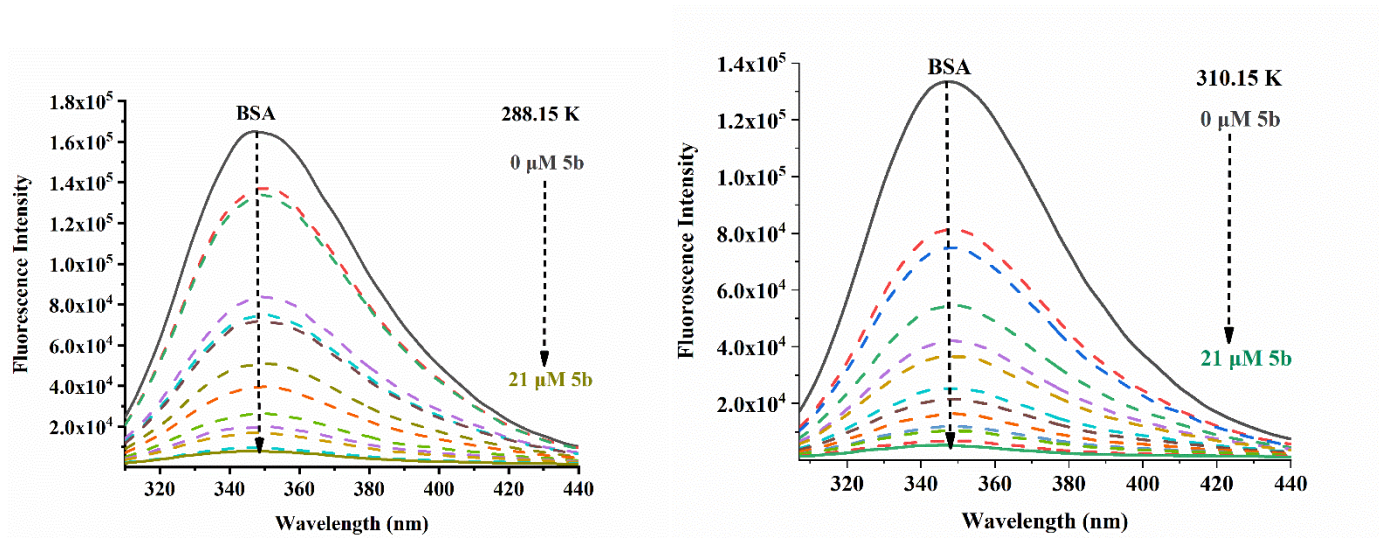

Figure S75: Fluorescence spectra of BSA titration with **5b** at different temperature such as 273.15 K, 283.15 K, 288.15 K, 310.15 K.

**Docking images:**

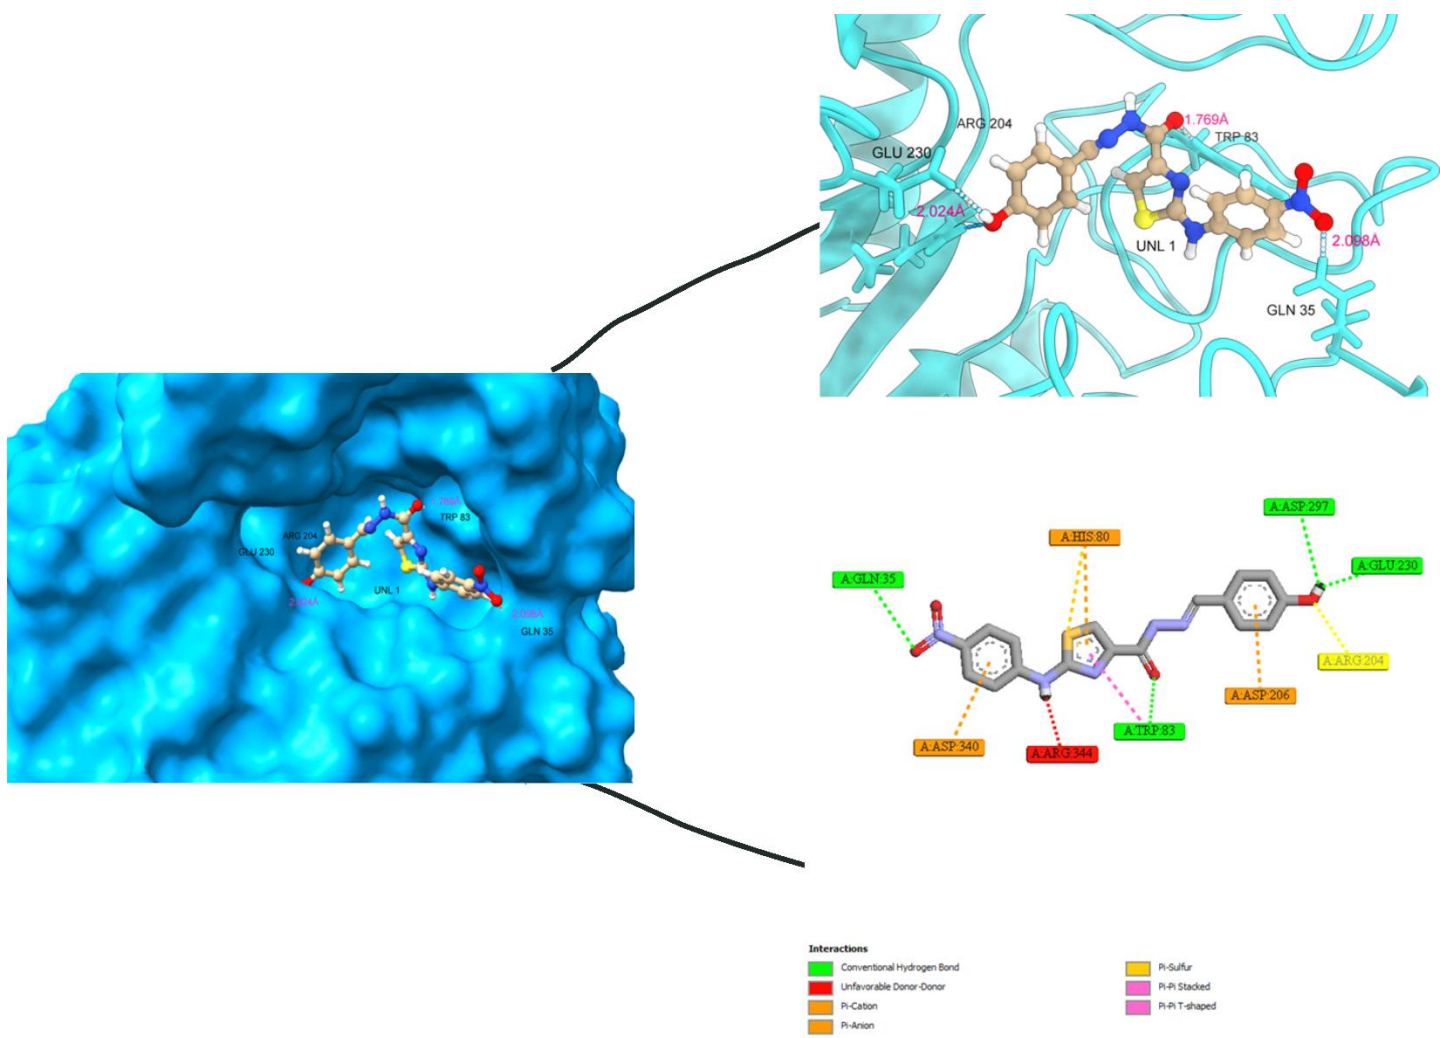

Figure S76: The ligand-protein interaction profile of  $\alpha$ -amylase and **pose A** of **5b**

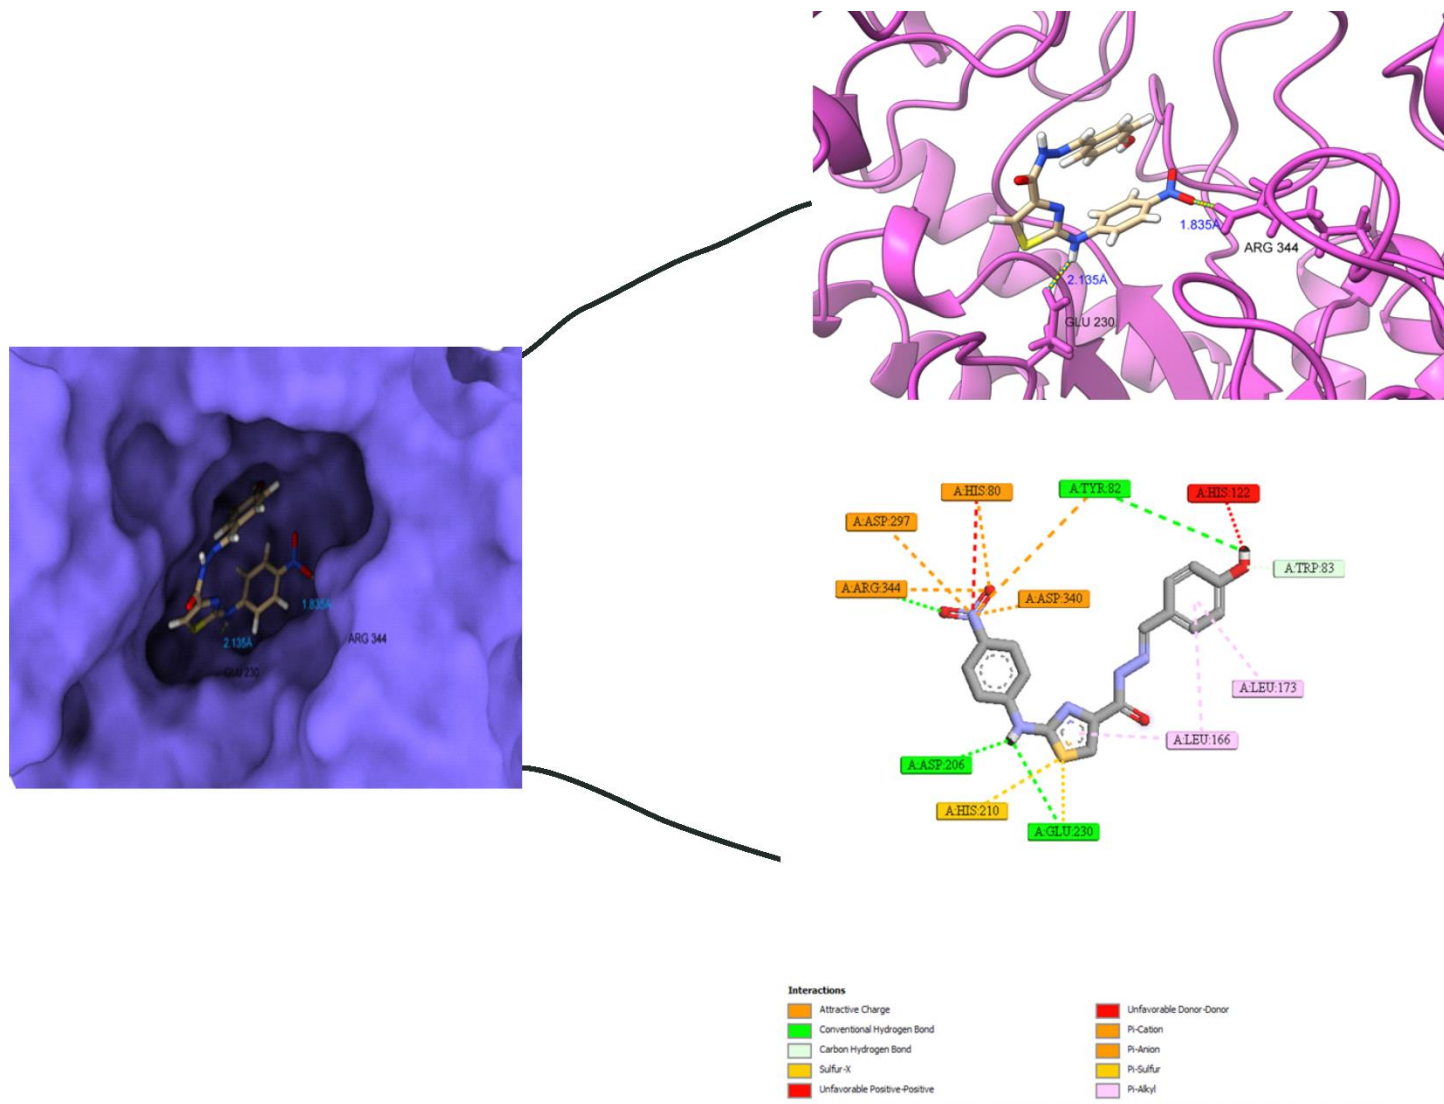

Figure S77: The ligand-protein interaction profile of  $\alpha$ -amylase and **pose D** of 5b.



## Conformation 4

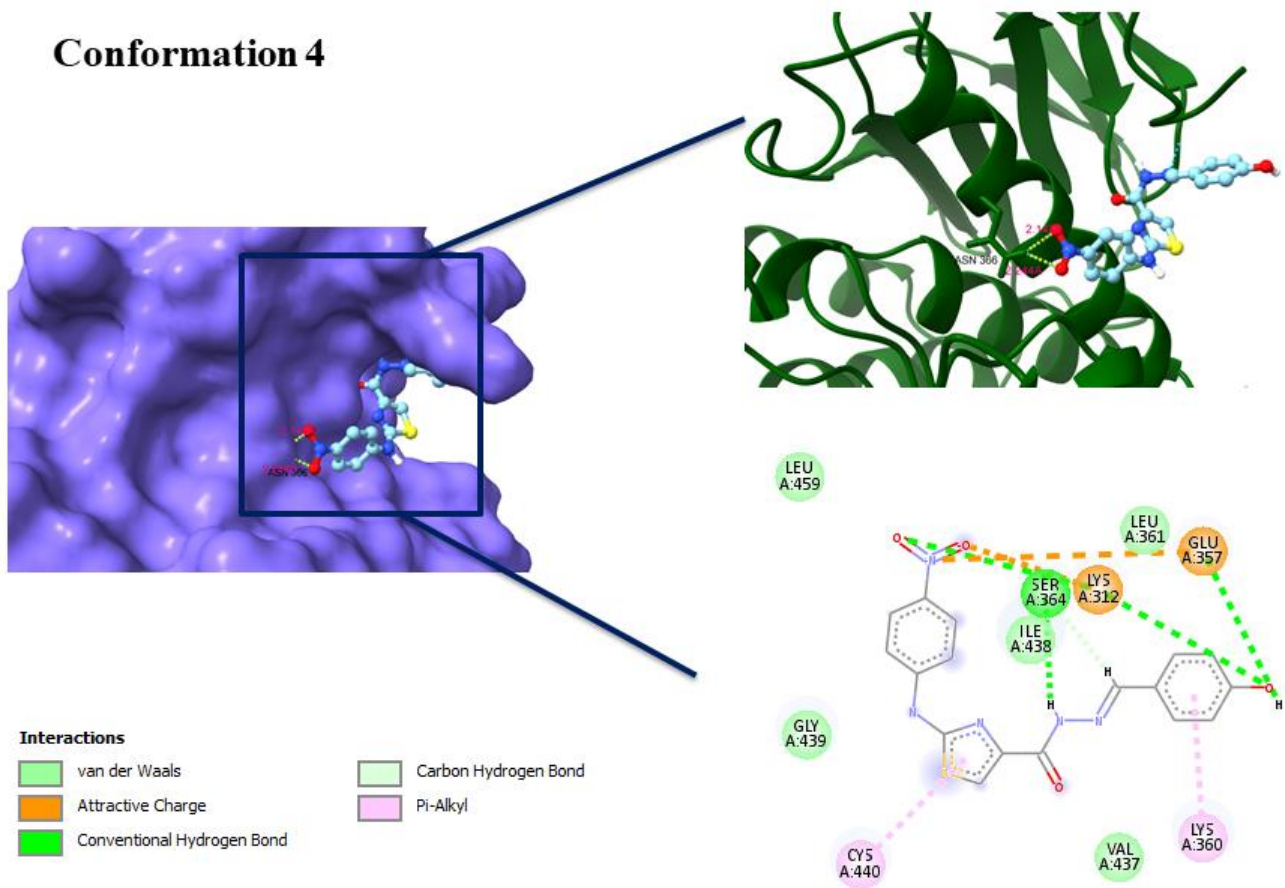

Figure S78: The ligand-protein interaction profile of  $\alpha$ -amylase and **pose C** of 5b

## Molecular dynamics graph:

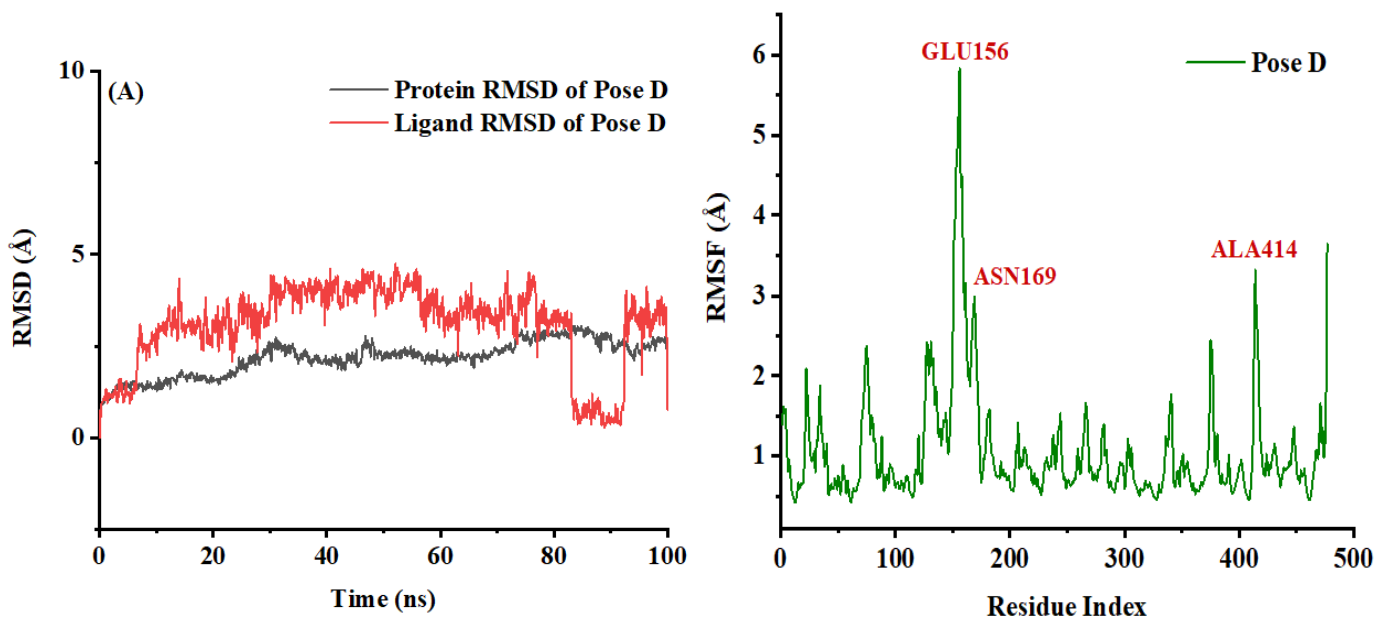

Figure S79: (A) RMSD of protein and ligand in 100 ns molecular dynamics simulation with **pose D** and (B) RMSF of complex in 100 ns molecular dynamics simulation.

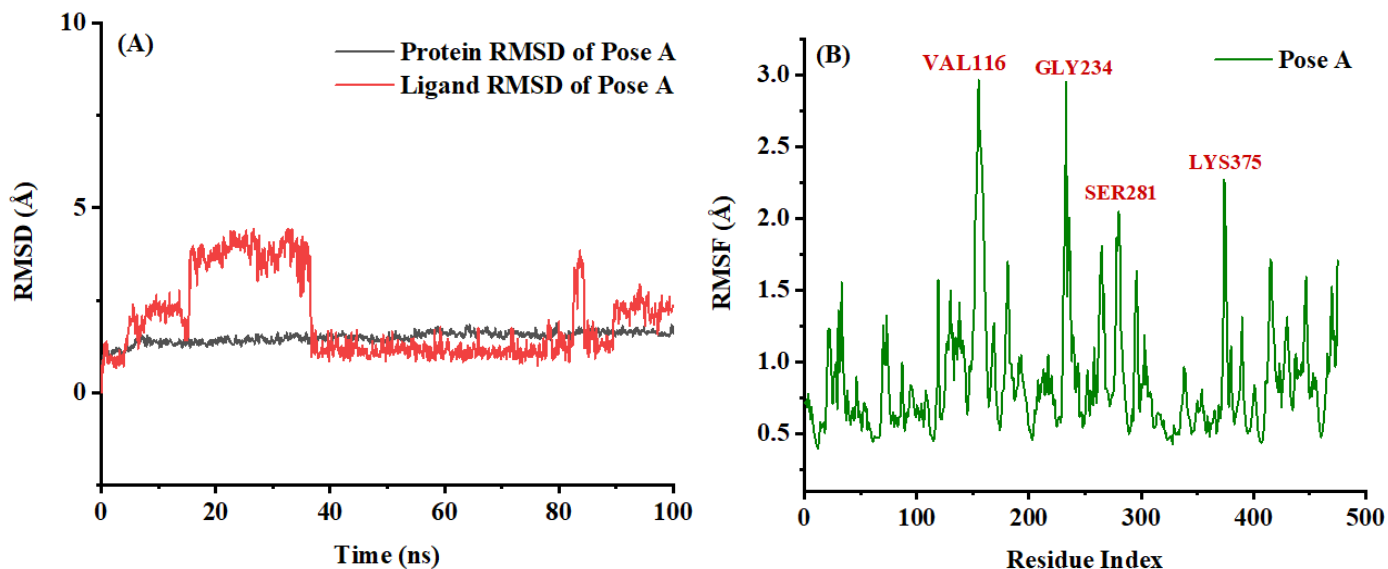

Figure S80: (A) RMSD of protein and ligand in 100 ns molecular dynamics simulation with **pose A** and (B) RMSF of complex in 100 ns molecular dynamics simulation.

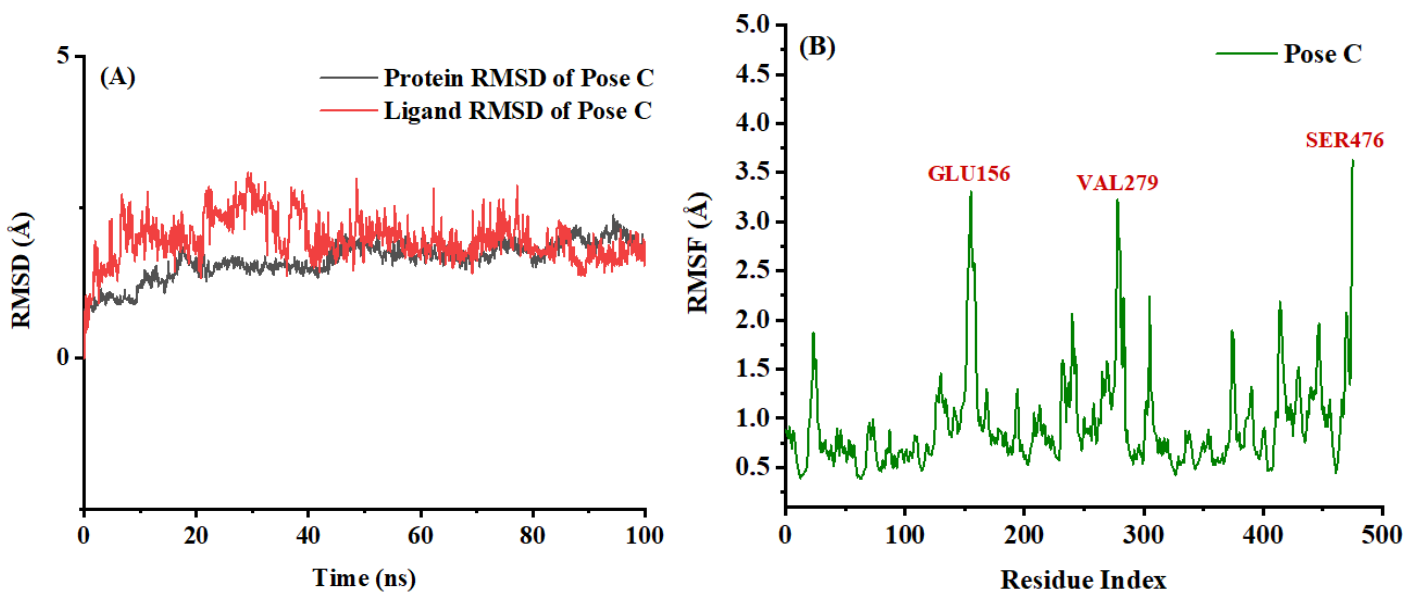

Figure S81: (A) RMSD of protein and ligand in 100 ns molecular dynamics simulation with **pose C** and (B) RMSF of complex in 100 ns molecular dynamics simulation.

Table S4: Interaction detail for pose B against the  $\alpha$ -amylase enzyme

| Name                          | Distance | Category | Type                | From      | From chemistry | To      | To chemistry |
|-------------------------------|----------|----------|---------------------|-----------|----------------|---------|--------------|
| <b>Interactions of pose B</b> |          |          |                     |           |                |         |              |
| CYS475-UNL1                   | 2.13352  | H Bond   | Conventional H-Bond | CYS475:HN | H-Donor        | UNL1:N5 | H-Acceptor   |
| GLY56-UNL1                    | 2.97914  | H Bond   | C-H Bond            | GLY56:CA  | H-Donor        | UNL1:O3 | H-           |

|             |         |             |                  |           |                 |         |                        |
|-------------|---------|-------------|------------------|-----------|-----------------|---------|------------------------|
| ALA367-UNL1 | 3.09702 | H Bond      | C-H Bond         | ALA367:CA | H-Donor         | UNL1:O1 | Acceptor<br>H-Acceptor |
| ALA367-UNL1 | 3.30973 | Hydrophobic | $\pi$ - $\sigma$ | ALA367:CB | C-H             | UNL1    | $\pi$ -Orbitals        |
| LYS473-UNL1 | 2.93767 | Other       | $\pi$ -Lone Pair | LYS473:O  | Lone Pair       | UNL1    | $\pi$ -Orbitals        |
| UNL1-ALA363 | 4.77633 | Hydrophobic | $\pi$ -Alkyl     | UNL1      | $\pi$ -Orbitals | ALA363  | Alkyl                  |
| UNL1-ALA367 | 4.30228 | Hydrophobic | $\pi$ -Alkyl     | UNL1      | $\pi$ -Orbitals | ALA367  | Alkyl                  |
| UNL1-ALA363 | 4.75605 | Hydrophobic | $\pi$ -Alkyl     | UNL1      | $\pi$ -Orbitals | ALA363  | Alkyl                  |
| UNL1-LYS473 | 5.48311 | Hydrophobic | $\pi$ -Alkyl     | UNL1      | $\pi$ -Orbitals | LYS473  | Alkyl                  |

Table S5: Interaction detail for pose D against the  $\alpha$ -amylase enzyme

| Pose D       |          |             |                       |             |                 |            |                 |
|--------------|----------|-------------|-----------------------|-------------|-----------------|------------|-----------------|
| Name         | Distance | category    | Type                  | From        | From chemistry  | To         | To chemistry    |
| ARG344-UNL1  | 1.83522  | H Bond      | Conventional H Bond   | ARG344:HH22 | H-Donor         | UNL1:O     | H-Acceptor      |
| UNL1- ASP206 | 2.73149  | H Bond      | Conventional H Bond   | UNL1:H      | H-Donor         | ASP206:OD1 | H-Acceptor      |
| UNL1- GLU230 | 2.1354   | H Bond      | Conventional H Bond   | UNL1:H      | H-Donor         | GLU230:OE1 | H-Acceptor      |
| UNL1-TYR82   | 2.15874  | H Bond      | Conventional H Bond   | UNL1:H      | H-Donor         | TYR82:O    | H-Acceptor      |
| TRP83-UNL1   | 3.08257  | H Bond      | C-H Bond              | TRP83:CD1   | H-Donor         | UNL1:O     | H-Acceptor      |
| UNL1- GLU230 | 2.957    | Other       | Sulfur-X              | UNL1:S      | Sulfur          | GLU230:OE1 | O,N,S           |
| UNL1-HIS210  | 4.99723  | Other       | $\pi$ -Sulfur         | UNL1:S      | Sulfur          | HIS210     | $\pi$ -Orbitals |
| UNL1-UNL1    | 4.03737  | Hydrophobic | $\pi$ - $\pi$ Stacked | UNL1        | $\pi$ -Orbitals | UNL1       | $\pi$ -Orbitals |
| UNL1-LEU166  | 5.41429  | Hydrophobic | $\pi$ -Alkyl          | UNL1        | $\pi$ -Orbitals | LEU166     | Alkyl           |
| UNL1- LEU166 | 5.03294  | Hydrophobic | $\pi$ -Alkyl          | UNL1        | $\pi$ -Orbitals | LEU166     | Alkyl           |
| UNL1-LEU173  | 4.5615   | Hydrophobic | $\pi$ -Alkyl          | UNL1        | $\pi$ -Orbitals | LEU173     | Alkyl           |

Table S6: Interaction detail for pose A against the  $\alpha$ -amylase enzyme.

| Pose A       |          |             |                            |            |                 |           |                 |
|--------------|----------|-------------|----------------------------|------------|-----------------|-----------|-----------------|
| Name         | Distance | category    | Type                       | From       | From chemistry  | To        | To chemistry    |
| TYR335- UNL1 | 2.08639  | H Bond      | Conventional Hydrogen Bond | TYR335:HH  | H-Donor         | UNL1:O3   | H-Acceptor      |
| UNL1-TYR335  | 1.73456  | H Bond      | Conventional Hydrogen Bond | UNL1:H2    | H-Donor         | TYR335:OH | H-Acceptor      |
| UNL1-ALA346  | 2.61165  | H Bond      | Conventional Hydrogen Bond | UNL1:H2    | H-Donor         | ALA346:O  | H-Acceptor      |
| UNL1- THR32  | 2.0567   | H Bond      | Conventional Hydrogen Bond | UNL1:H3    | H-Donor         | THR32:OG1 | H-Acceptor      |
| THR29-UNL1   | 2.81299  | H Bond      | Carbon Hydrogen Bond       | THR29:CA   | H-Donor         | UNL1:O2   | H-Acceptor      |
| LEU349-UNL1  | 3.66429  | Hydrophobic | $\pi$ - $\sigma$           | LEU349:CD1 | C-H             | UNL1      | $\pi$ -Orbitals |
| UNL1-UNL1    | 4.73062  | Hydrophobic | $\pi$ - $\pi$ T-shaped     | UNL1       | $\pi$ -Orbitals | UNL1      | $\pi$ -Orbitals |
| UNL1-LEU349  | 5.41643  | Hydrophobic | $\pi$ -Alkyl               | UNL1       | $\pi$ -Orbitals | LEU349    | Alkyl           |

Table S7: Interaction detail for pose C against the  $\alpha$ -amylase enzyme.

| Pose C        |          |                          |                                   |             |                      |            |                         |
|---------------|----------|--------------------------|-----------------------------------|-------------|----------------------|------------|-------------------------|
| Name          | Distance | category                 | Type                              | From        | From chemistry       | To         | To chemistry            |
| UNL1-UNL1     | 5.37382  | Hydrophobic              | $\pi$ - $\pi$ T-shaped            | UNL1        | $\pi$ -Orbitals      | UNL1       | $\pi$ -Orbitals         |
| UNL1-VAL171   | 5.43811  | Hydrophobic              | $\pi$ -Alkyl                      | UNL1        | $\pi$ -Orbitals      | VAL171     | Alkyl                   |
| UNL1-ASP340   | 2.16191  | H Bond;<br>Electrostatic | Salt Bridge;<br>Attractive Charge | UNL1:H2     | H Donor;<br>Positive | ASP340:OD2 | H-Acceptor;<br>Negative |
| UNL1-VAL171   | 1.80986  | H Bond                   | Conventional<br>H Bond            | UNL1:H3     | H-Donor              | VAL171:O   | H-Acceptor              |
| UNL1-ASP297   | 5.43741  | Electrostatic            | Attractive Charge                 | UNL1:N4     | Positive             | ASP297:OD1 | Negative                |
| UNL1-UNL1     | 5.59105  | Other                    | $\pi$ -Sulfur                     | UNL1:S1     | Sulfur               | UNL1       | $\pi$ -Orbitals         |
| UNL1-TRP83    | 5.72309  | Other                    | $\pi$ -Sulfur                     | UNL1:S1     | Sulfur               | TRP83      | $\pi$ -Orbitals         |
| ARG344-UNL1   | 1.87237  | H Bond                   | Conventional<br>H Bond            | ARG344:HH22 | H-Donor              | UNL1:O3    | H-Acceptor              |
| HIS210-UNL1   | 2.35849  | H Bond                   | Conventional<br>H Bond            | HIS210:HE2  | H-Donor              | UNL1:O1    | H-Acceptor              |
| HIS80-UNL1    | 5.21914  | Hydrophobic              | $\pi$ - $\pi$ T-shaped            | HIS80       | $\pi$ -Orbitals      | UNL1       | $\pi$ -Orbitals         |
| LEU166CD-UNL1 | 3.66839  | Hydrophobic              | $\pi$ -Sigma                      | LEU166:CD1  | C-H                  | UNL1       | $\pi$ -Orbitals         |

## MMGBSA

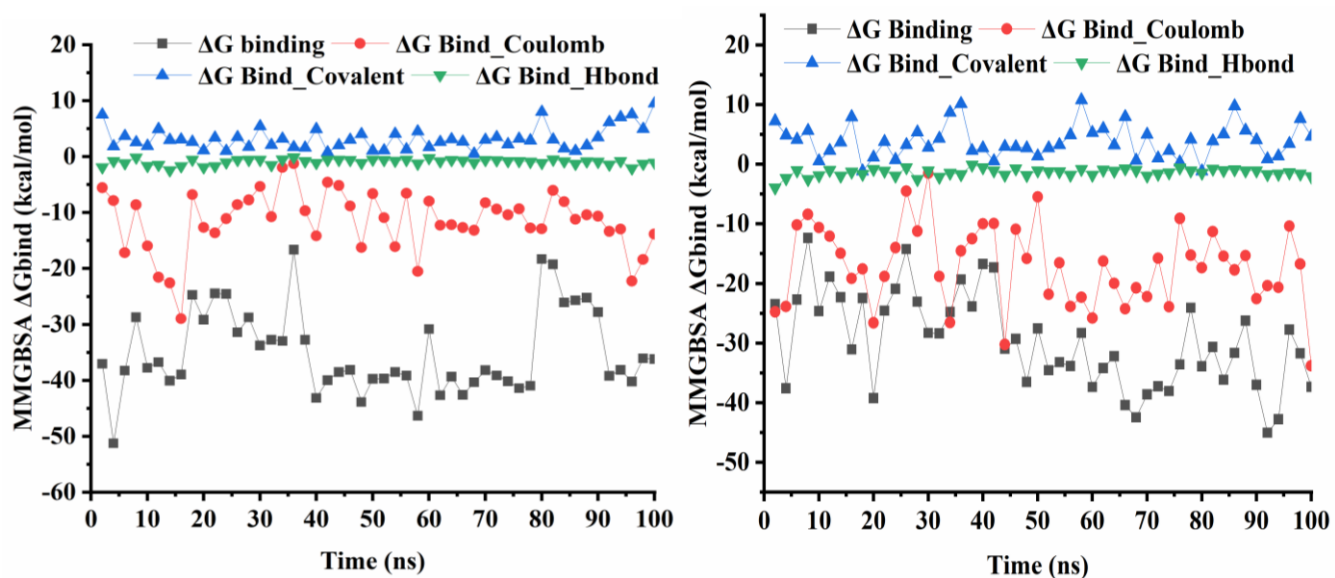

Figure S82: Pose A and pose B

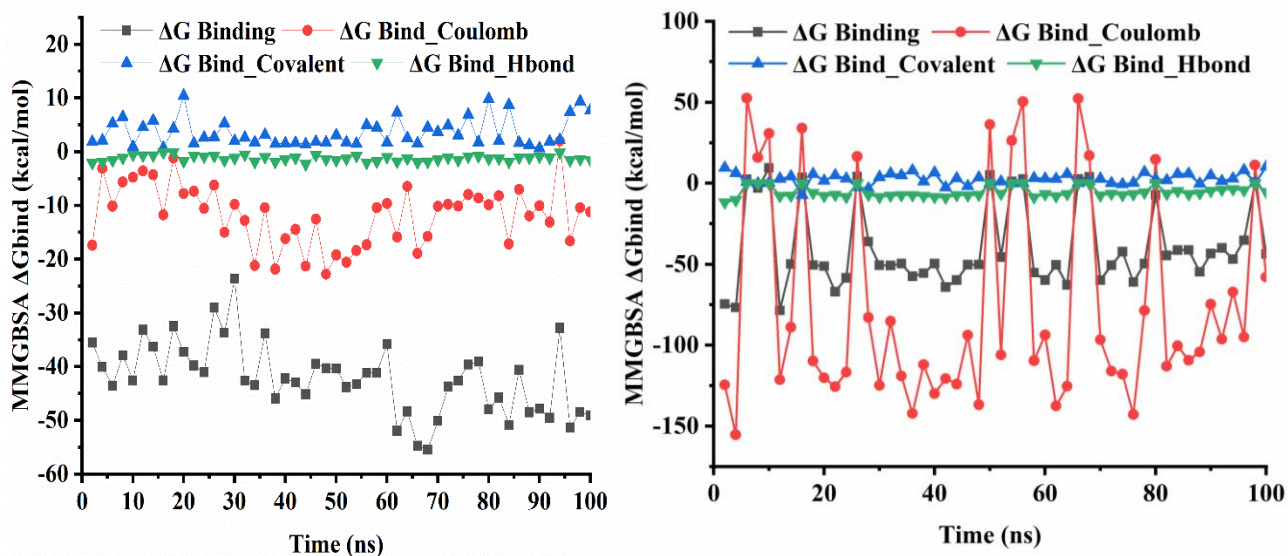

Figure S83: Pose D and acarbose

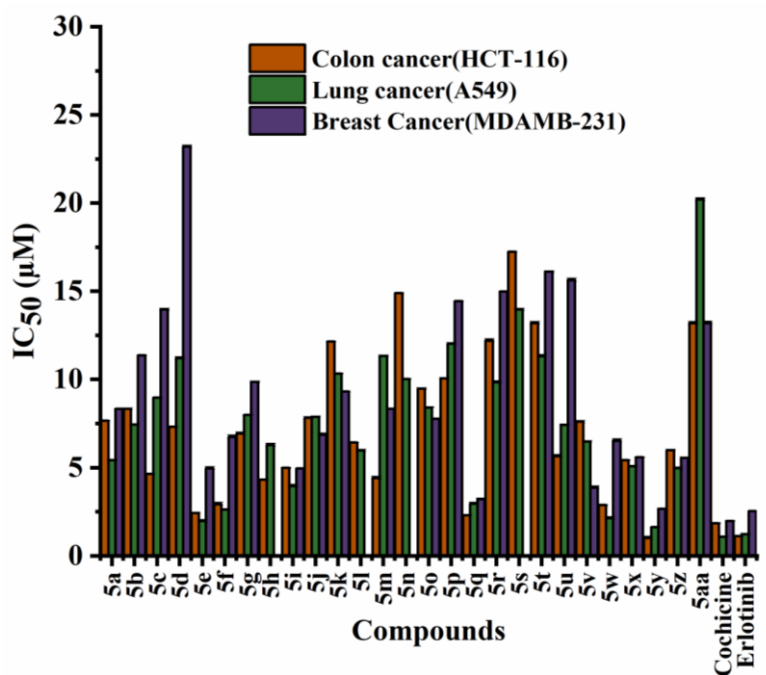

Figure S84: Comparative analysis of  $IC_{50}$  values of the synthesized compounds with standard drug cochicine and erlotinib.

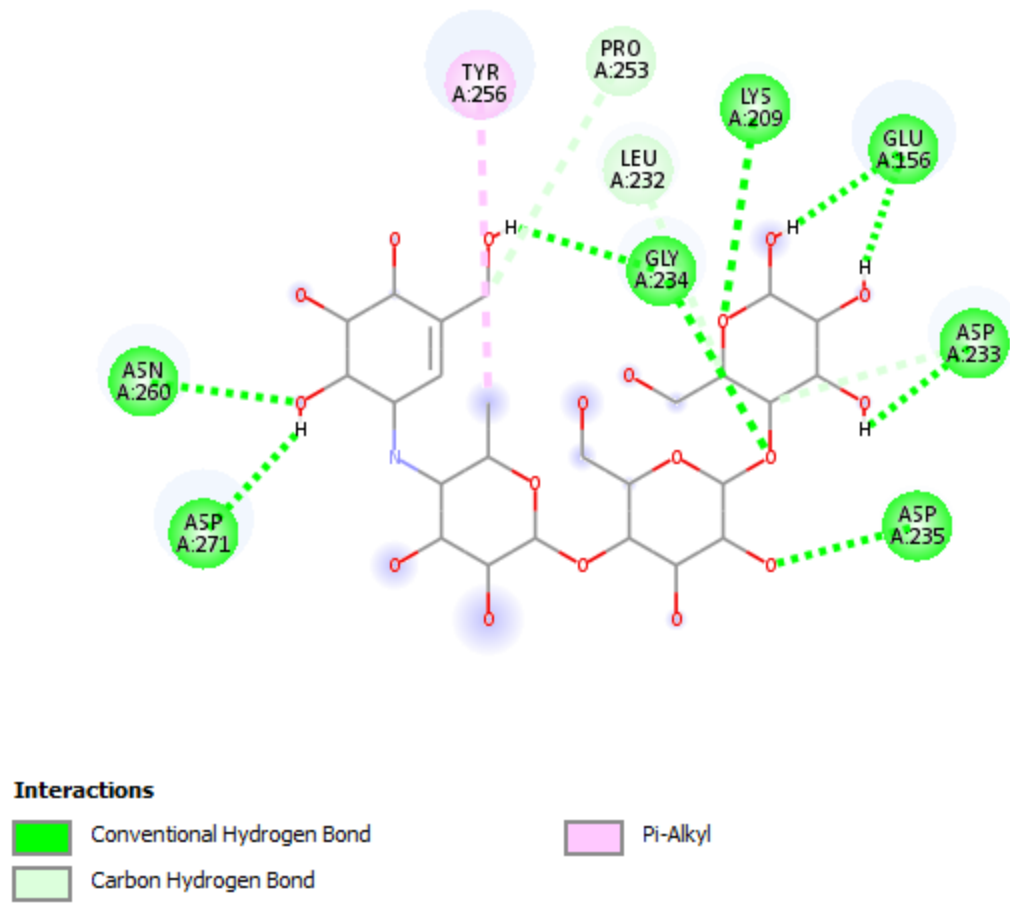

Figure S85: Acarbose 2D interactions

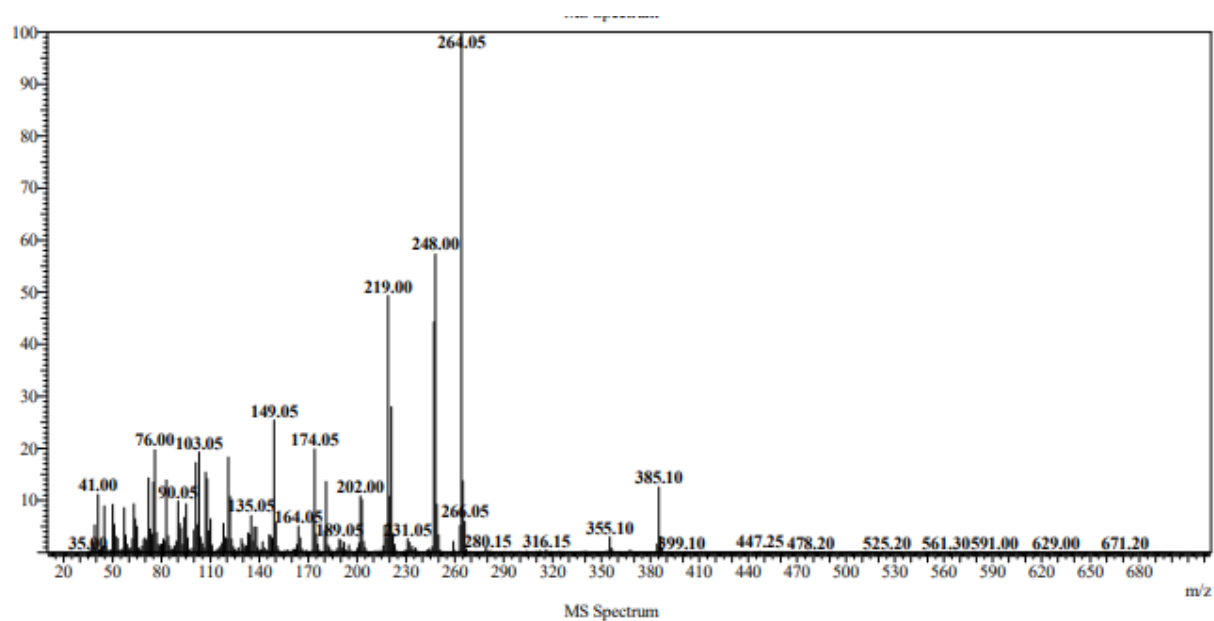

Figure S86: Mass spectrum of 5a

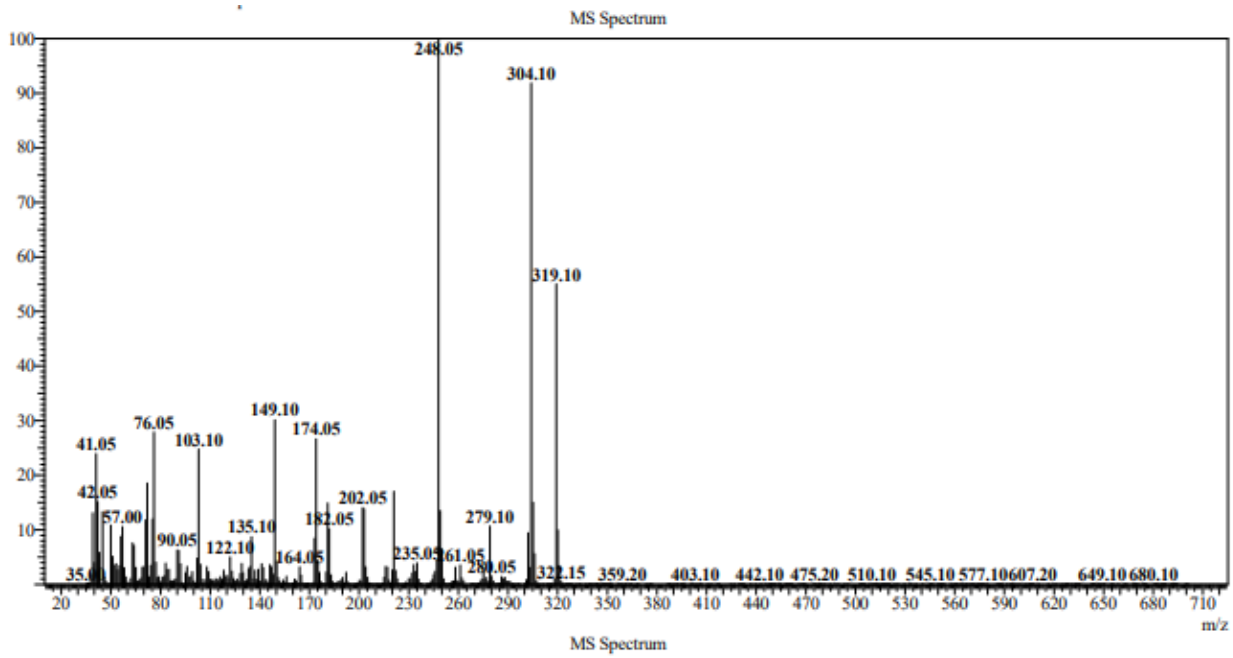

Figure S87: Mass spectrum of **5b**

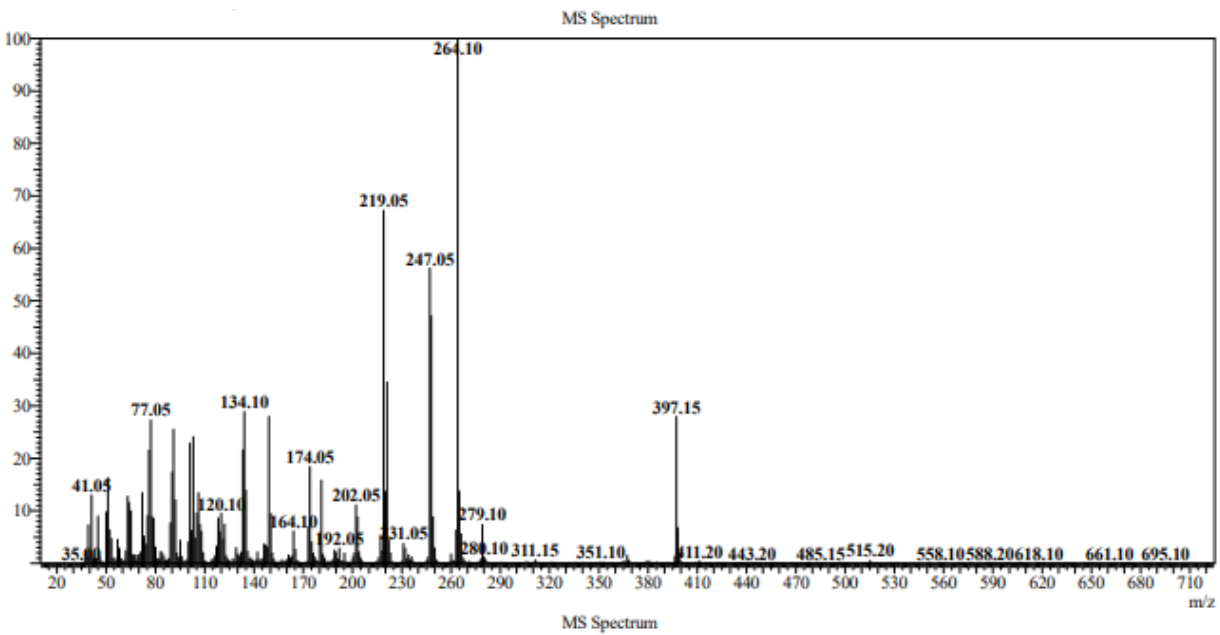

Figure S88: Mass spectrum of **5c**

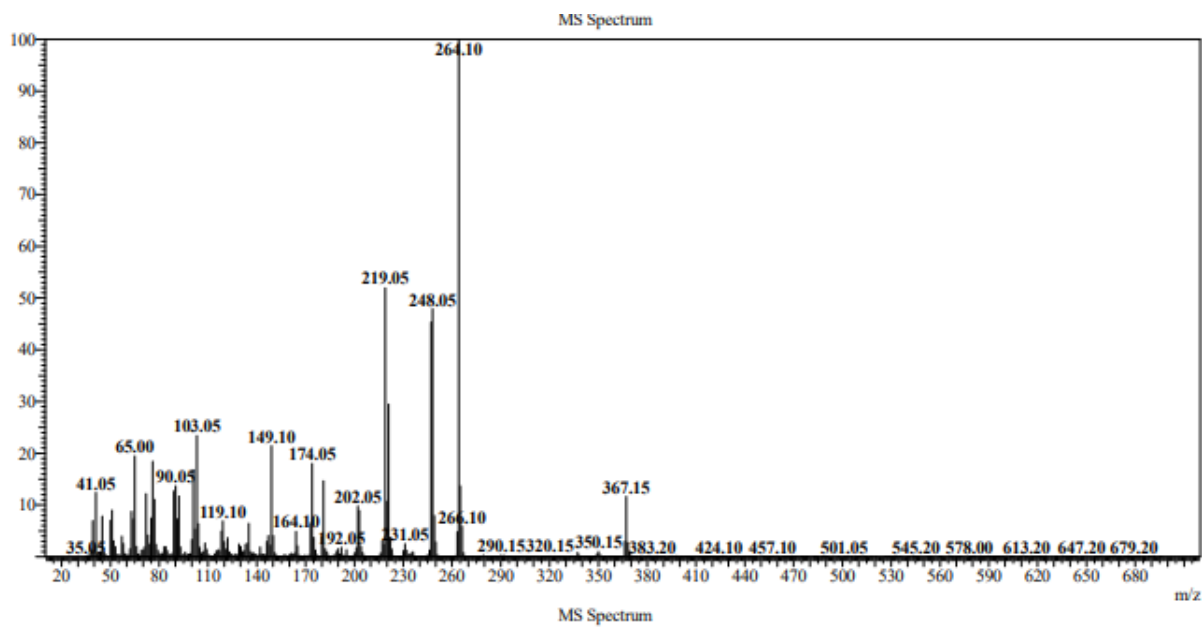

Figure S89: Mass spectrum of *5d*

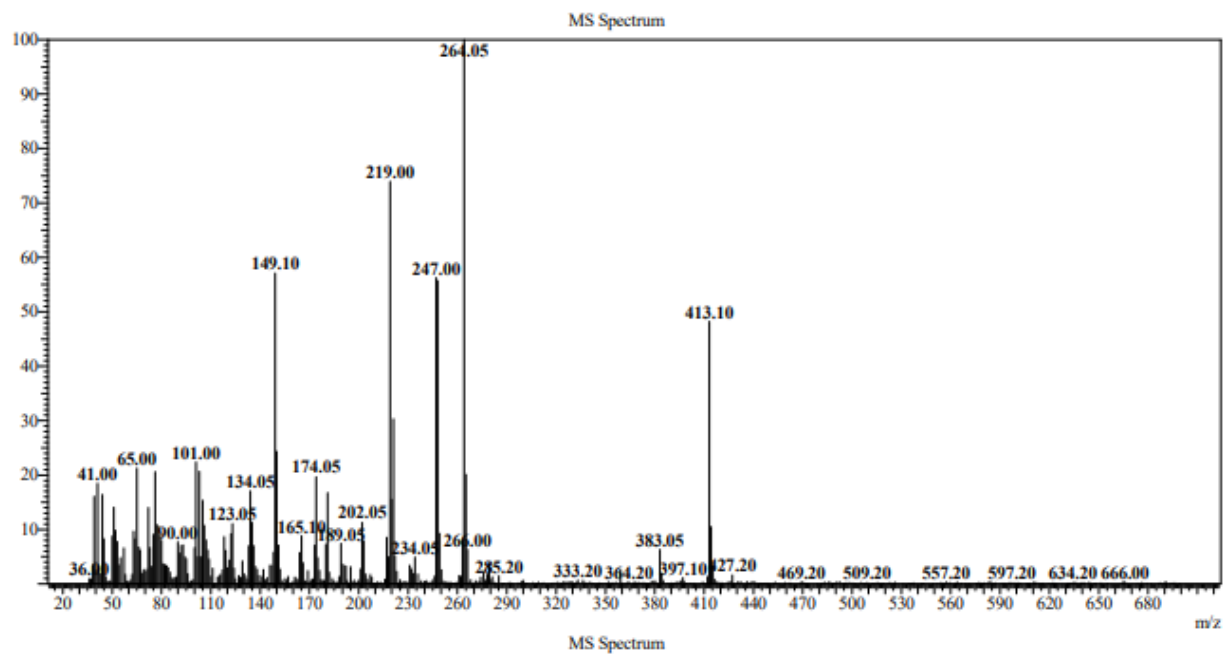

Figure S90: Mass spectrum of *5e*



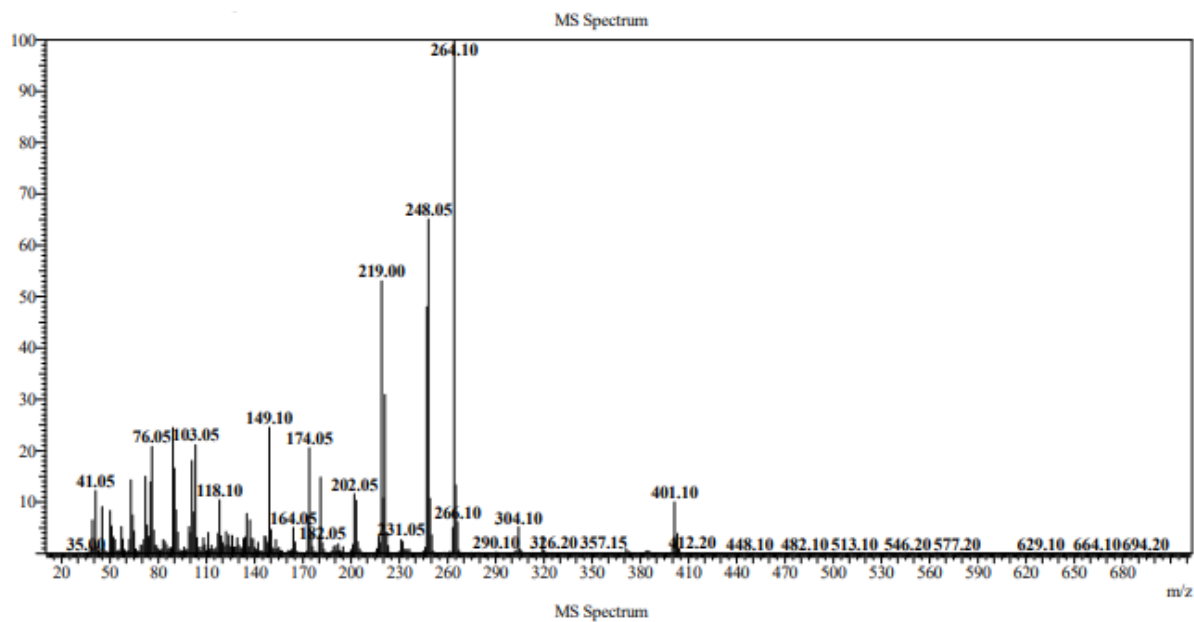

Figure S91: Mass spectrum of **5f**

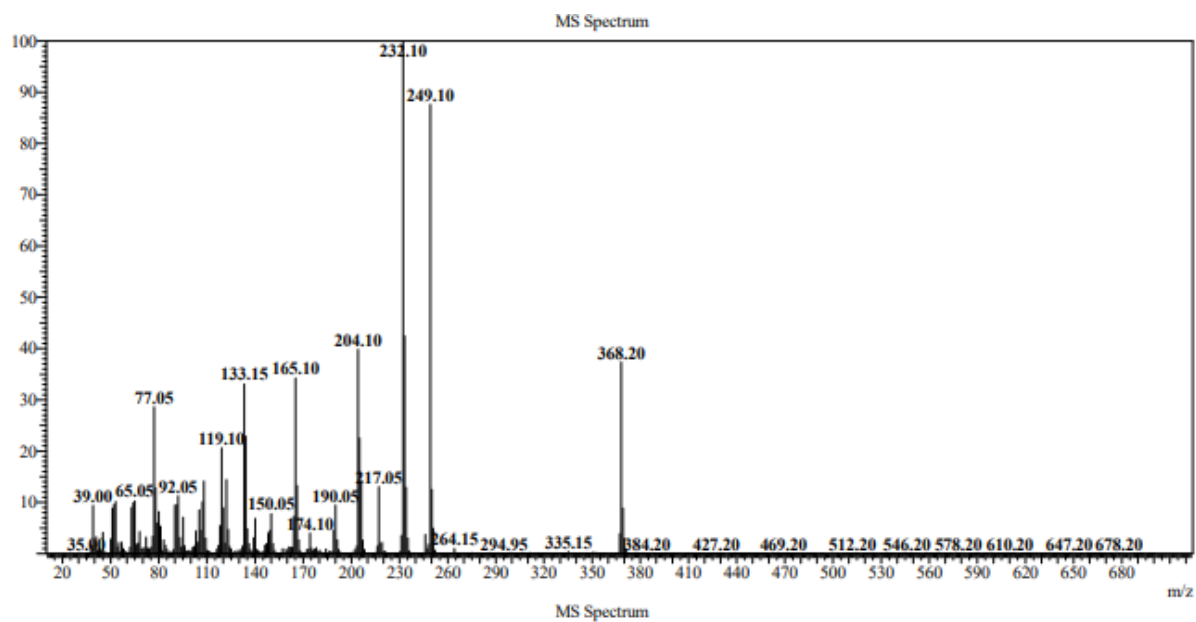

Figure S92: Mass spectrum of **5g**

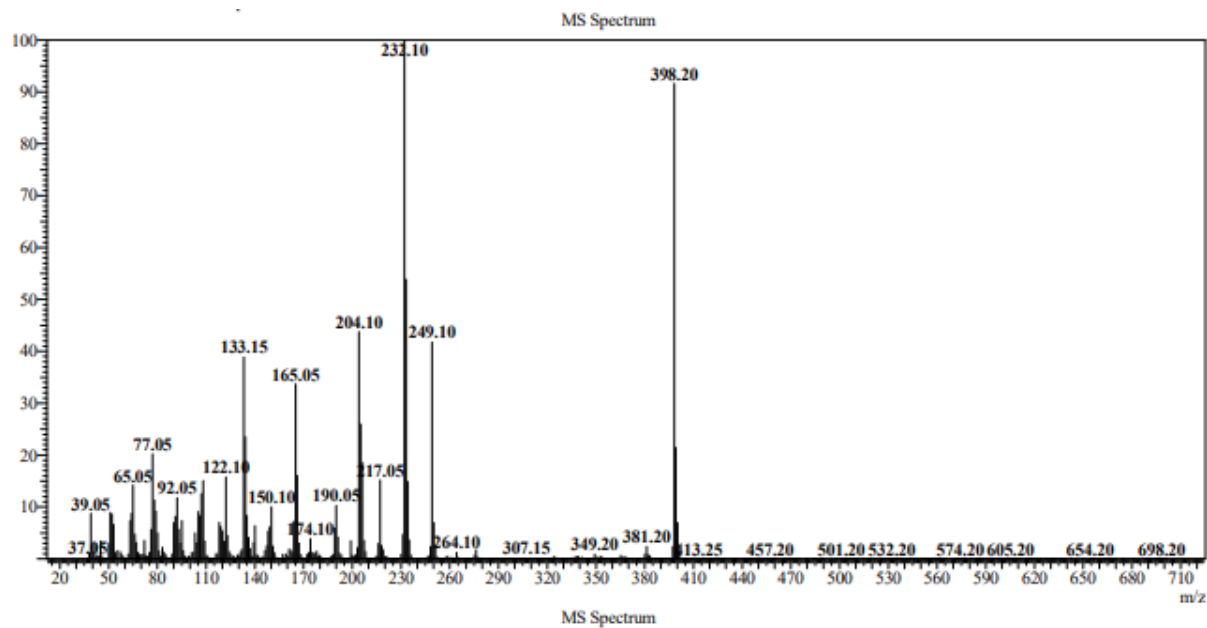

Figure S93: Mass spectrum of 5z

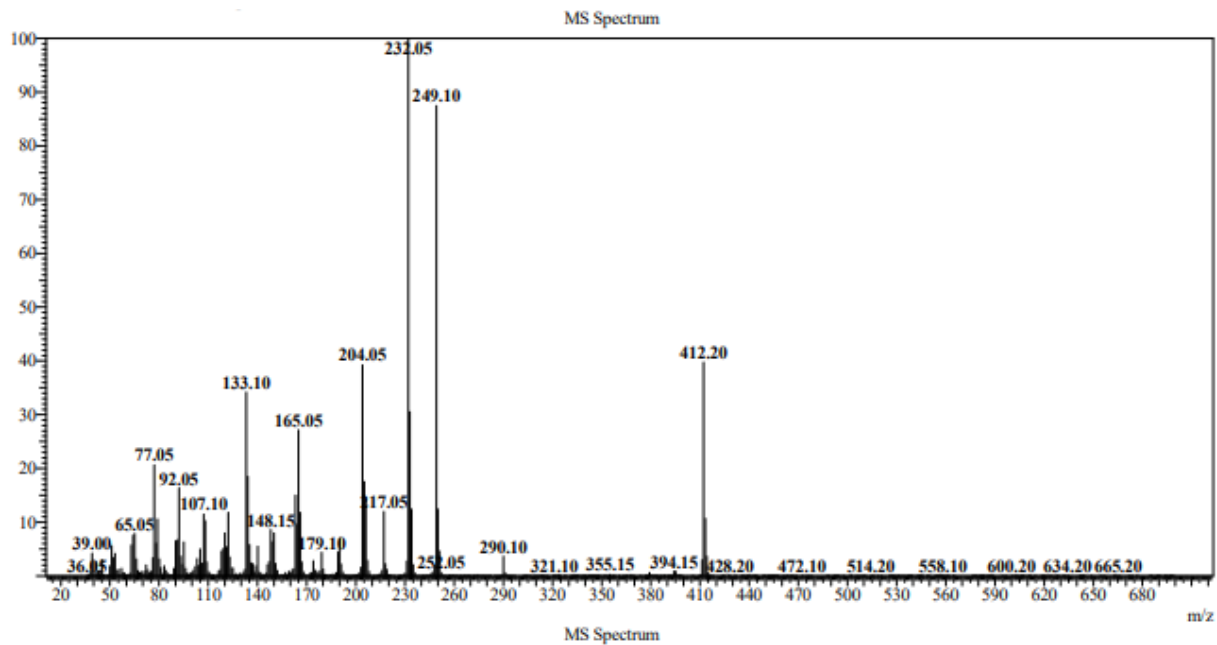

Figure S94: Mass spectrum of 5q

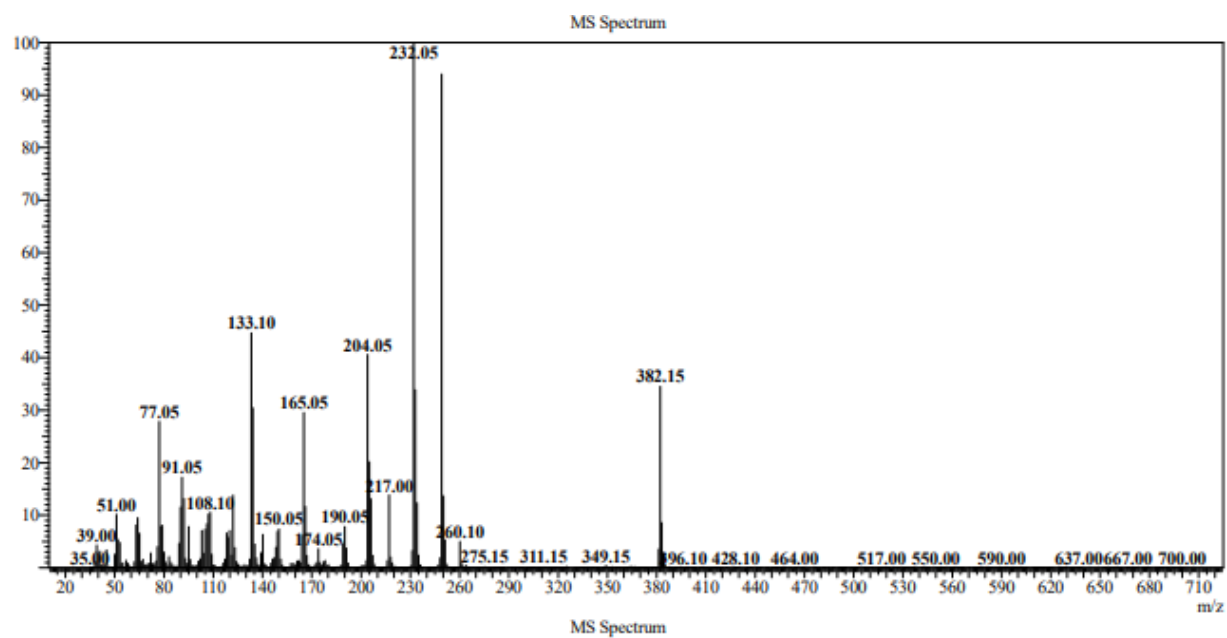

Figure S95: Mass spectrum of 5J

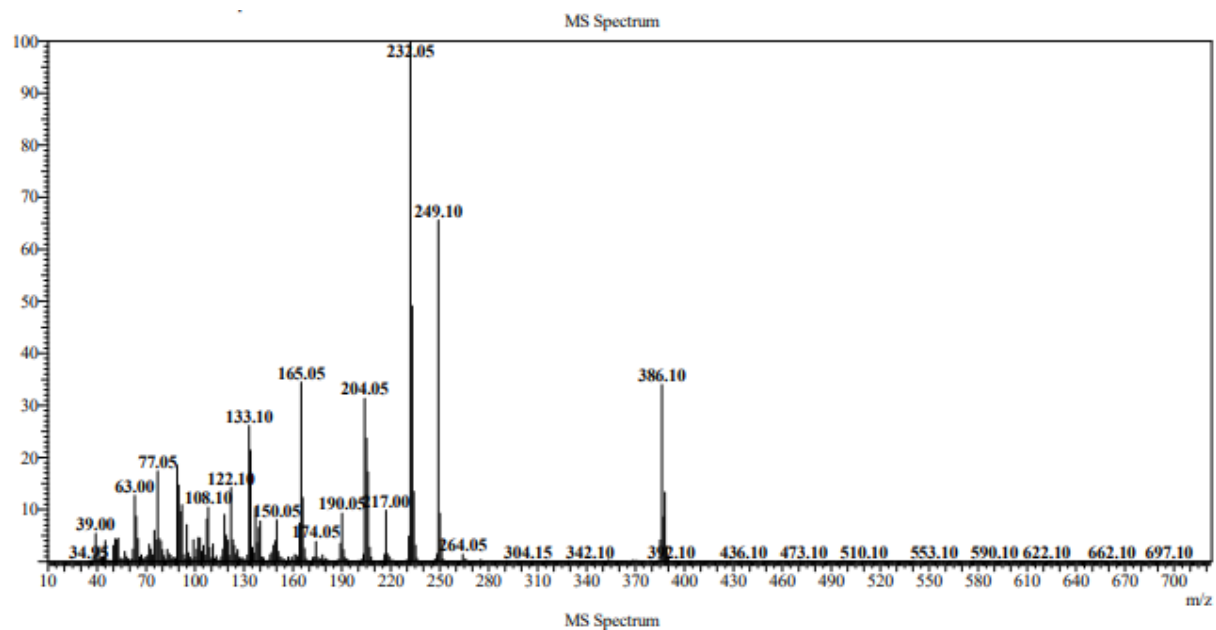

Figure S96: Mass spectrum of 5k

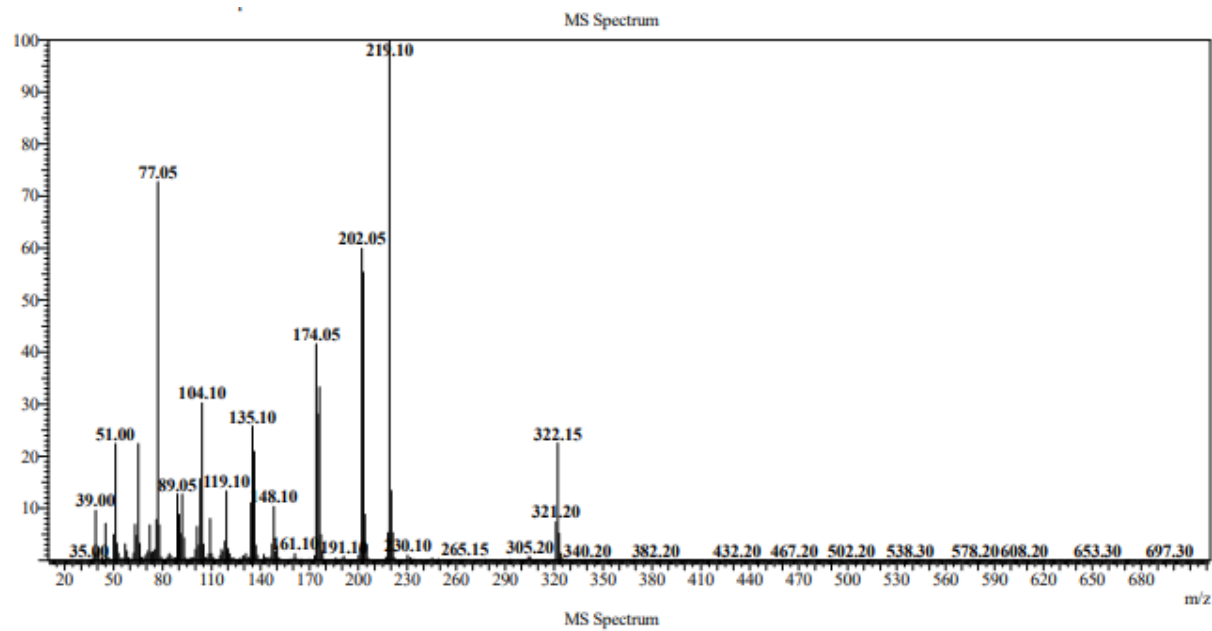

Figure S97: Mass spectrum of *5l*

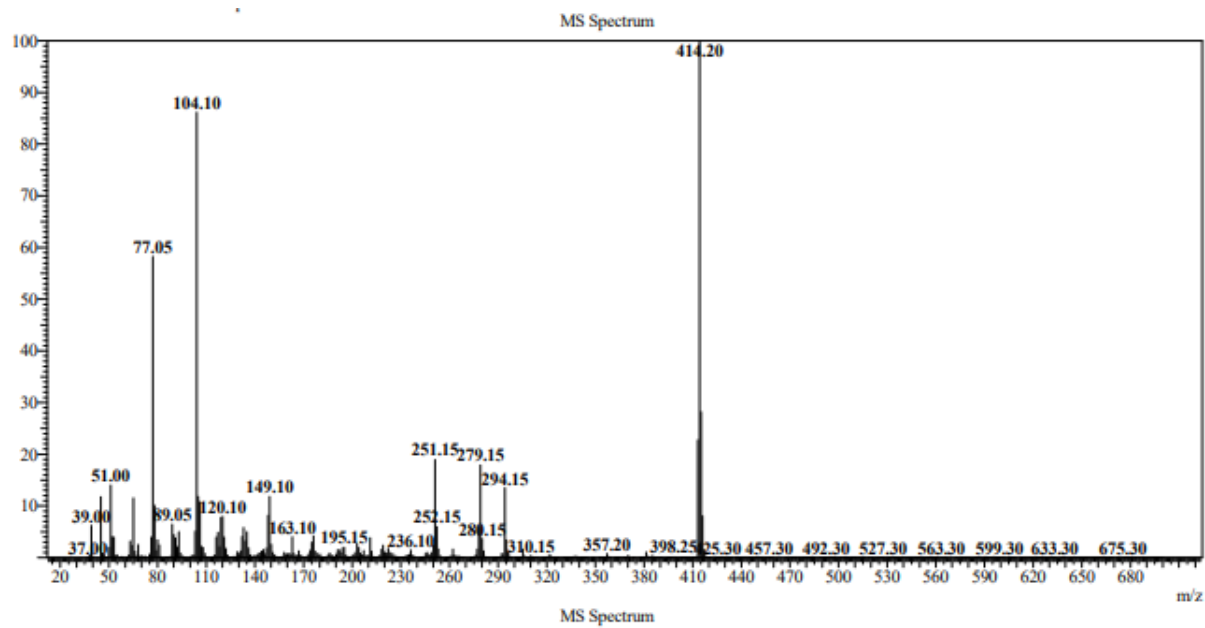

Figure S98: Mass spectrum of *5m*

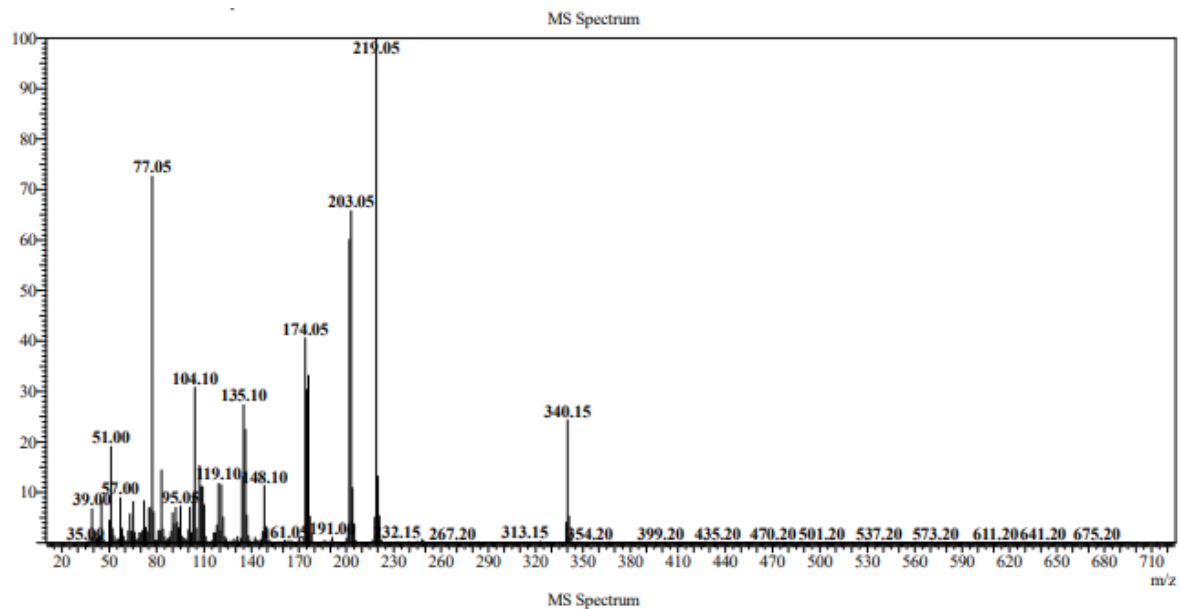

Figure S99: Mass spectrum of **5o**

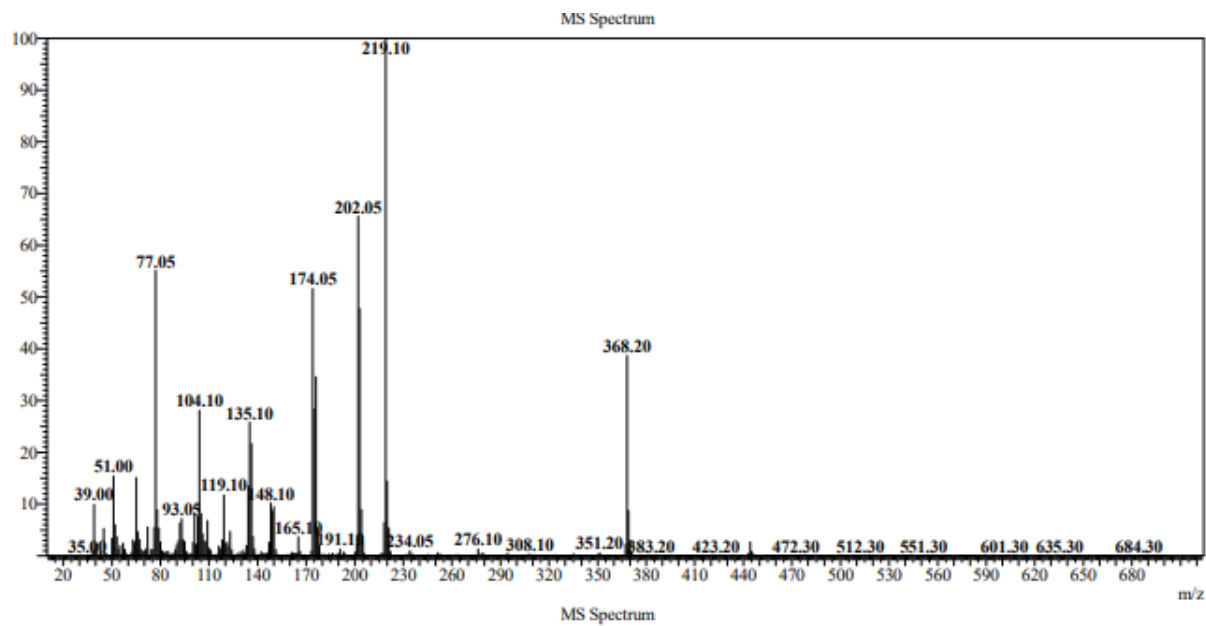

Figure S100: Mass spectrum of **5p**

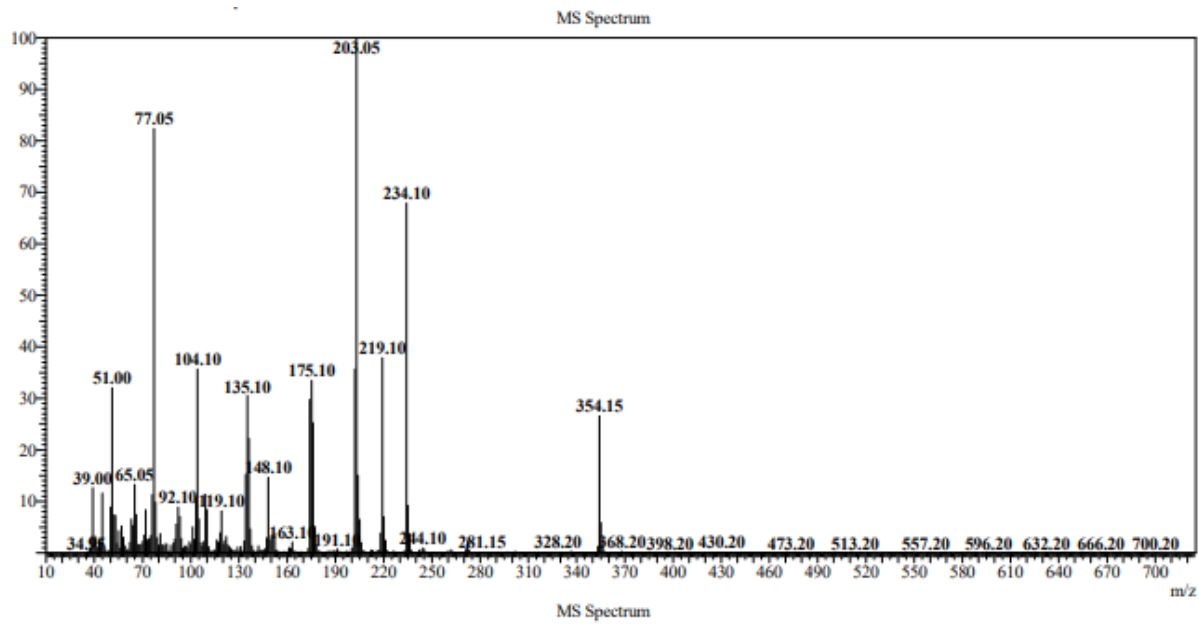

Figure S101: Mass spectrum of **5r**

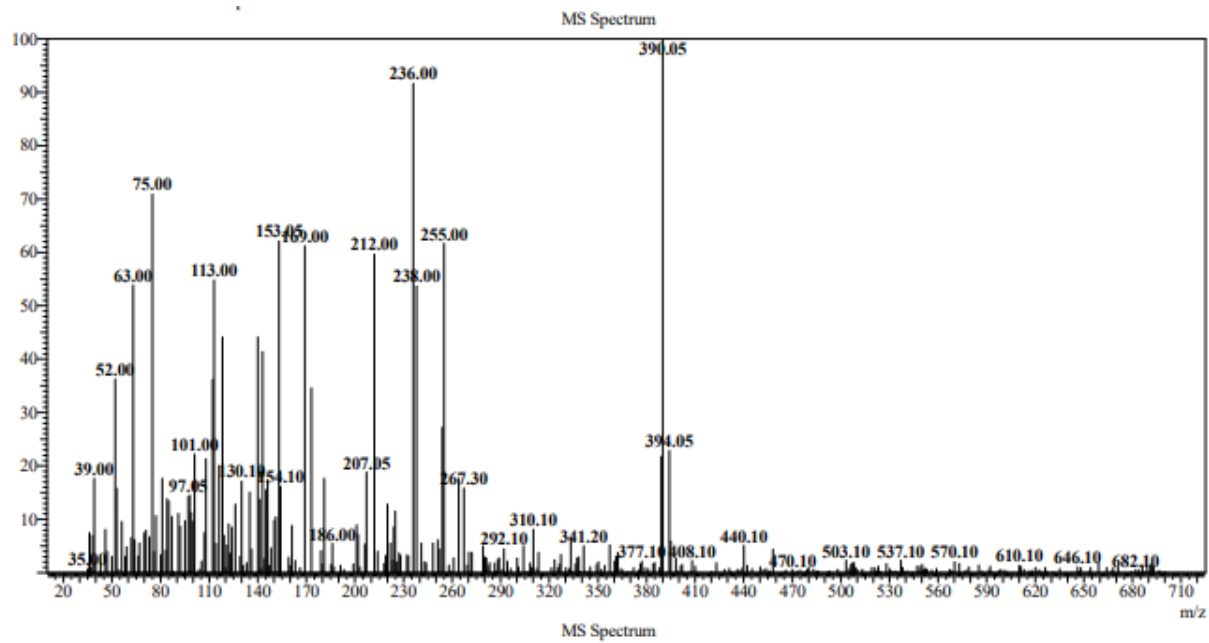

Figure S102: Mass spectrum of **5s**

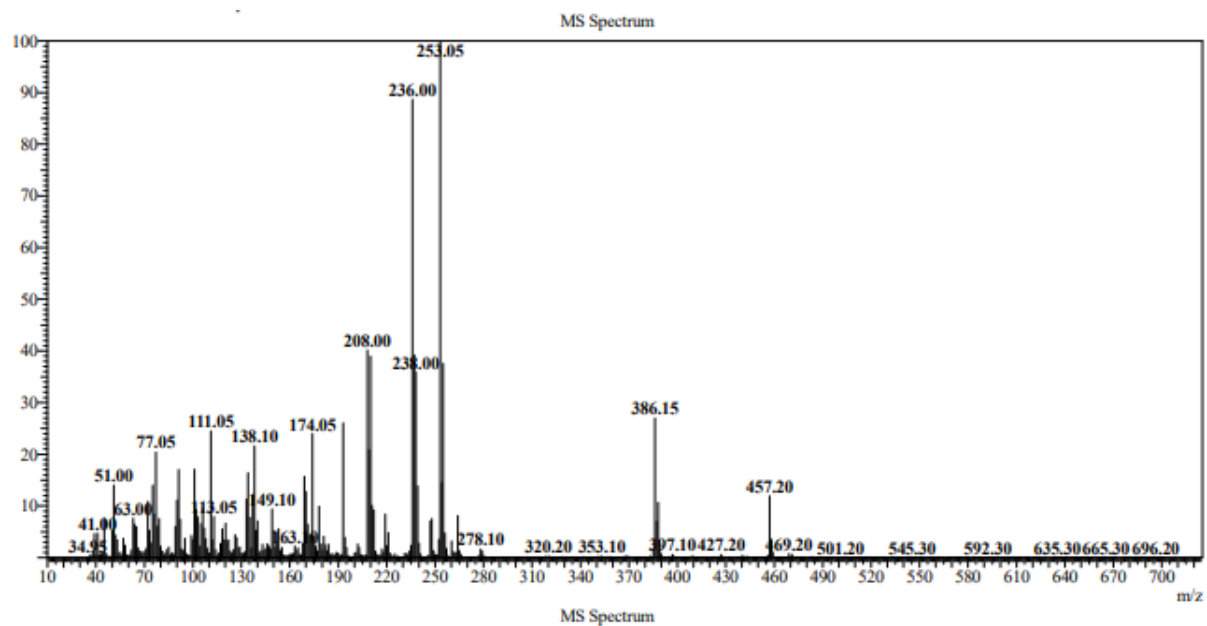

Figure S103: Mass spectrum of **5t**

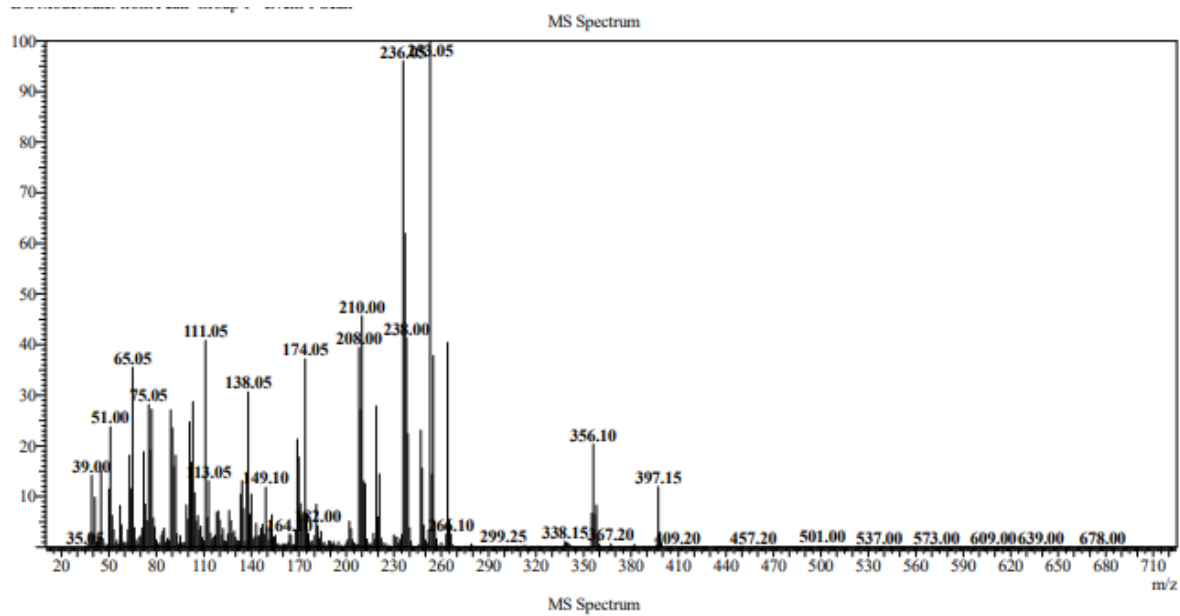

Figure S104: Mass spectrum of **5u**

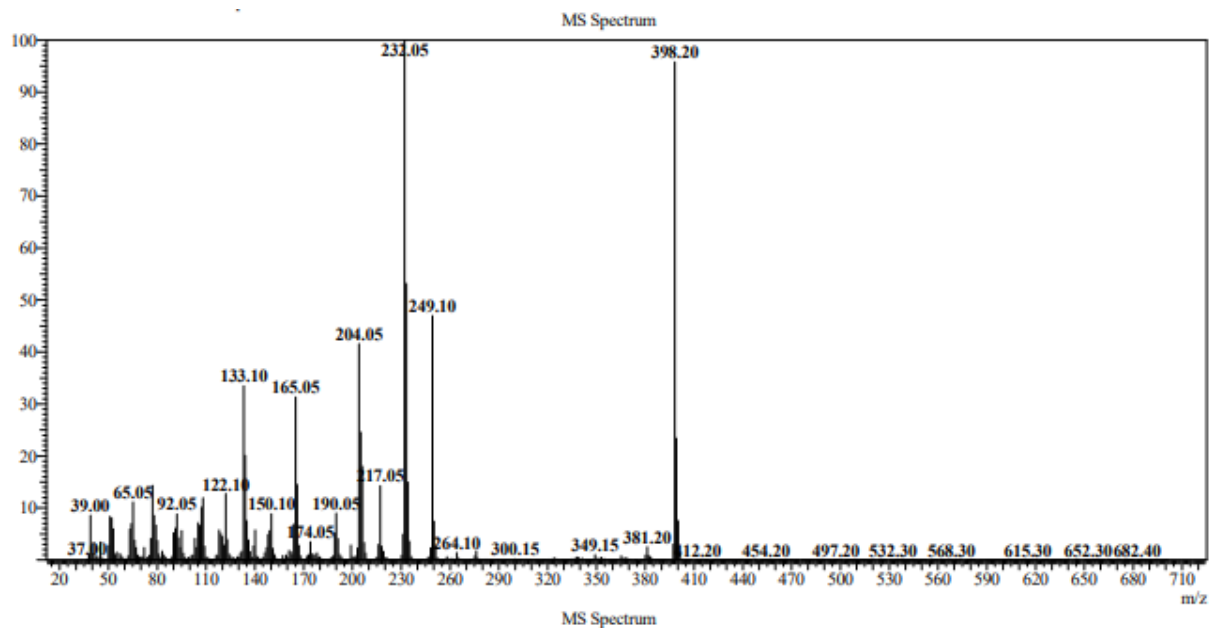

Figure S105: Mass spectrum of **5n**

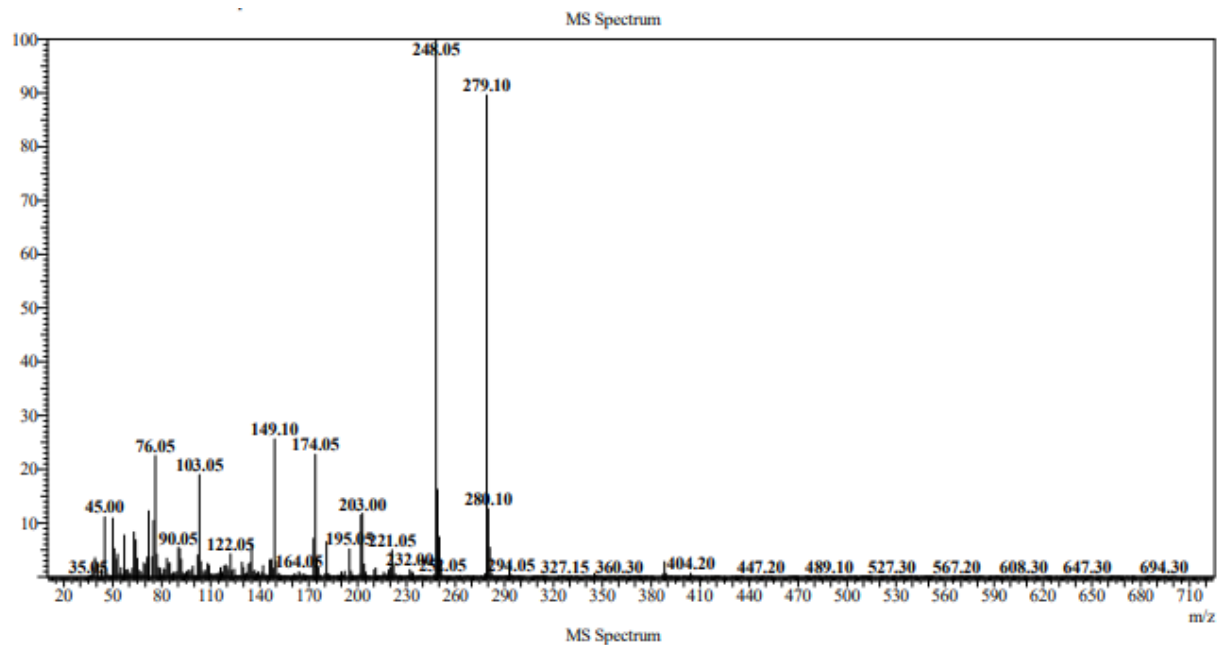

Figure S106: Mass spectrum of **5y**



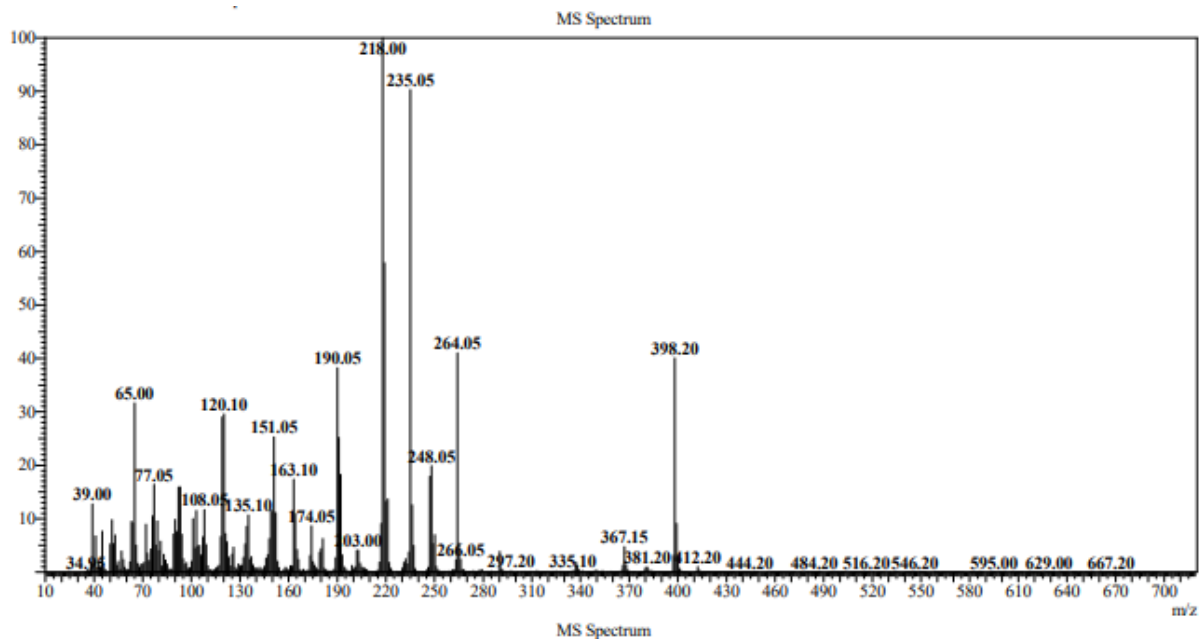

Figure S107: Mass spectrum of **5i**

### Elemental Composition Report

Page 1

#### Single Mass Analysis

Tolerance = 5.0 mDa / DBE: min = -1.5, max = 50.0

Element prediction: Off

Number of isotope peaks used for i-FIT = 3

Monoisotopic Mass, Odd and Even Electron Ions

42 formula(e) evaluated with 1 results within limits (up to 50 closest results for each mass)

Elements Used:

C: 0-22 H: 0-50 N: 0-4 O: 0-2 S: 0-1

200123\_5b 20 (0.223)

IITRPR

XEVO G2-XS QTOF

Test Name :

200123\_5b

1: TOF MS ES+

1.04e+007

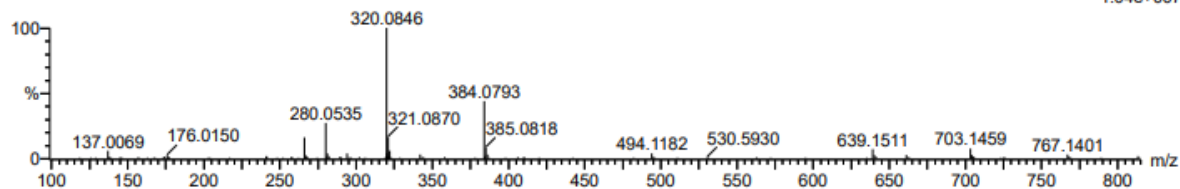

Minimum: -1.5  
Maximum: 5.0 10.0 50.0

| Mass     | Calc. Mass | mDa  | PPM  | DBE  | i-FIT | Norm | Conf (%) | Formula         |
|----------|------------|------|------|------|-------|------|----------|-----------------|
| 384.0793 | 384.0807   | -1.4 | -3.6 | 17.5 | 893.4 | n/a  | n/a      | C22 H14 N3 O2 S |

Figure S108: HRMS of **5b**

Single Mass Analysis

Tolerance = 5.0 mDa / DBE: min = -1.5, max = 50.0

Element prediction: Off

Number of isotope peaks used for i-FIT = 3

Monoisotopic Mass, Even Electron Ions

117 formula(e) evaluated with 1 results within limits (up to 50 closest results for each mass)

Elements Used:

C: 0-22 H: 0-50 N: 0-5 O: 0-5 S: 0-1

200123\_5e 52 (0.543)

IITRPR

XEVO G2-XS QTOF

Test Name :

200123\_5e

1: TOF MS ES+

5.69e+005

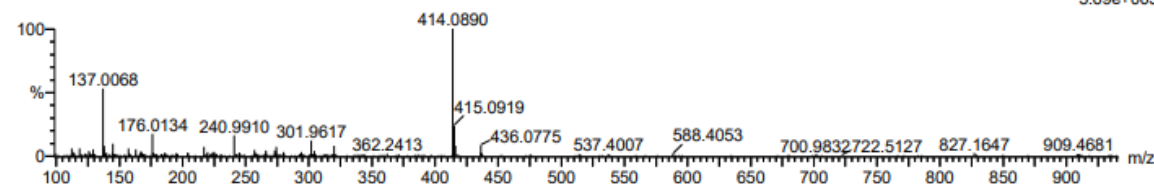

Minimum: -1.5  
Maximum: 5.0 10.0 50.0

| Mass     | Calc. Mass | mDa | PPM | DBE  | i-FIT | Norm | Conf (%) | Formula         |
|----------|------------|-----|-----|------|-------|------|----------|-----------------|
| 414.0890 | 414.0872   | 1.8 | 4.3 | 13.5 | 696.3 | n/a  | n/a      | C18 H16 N5 O5 S |

Figure S109: HRMS of 5e

Single Mass Analysis

Tolerance = 5.0 mDa / DBE: min = -1.5, max = 50.0

Element prediction: Off

Number of isotope peaks used for i-FIT = 3

Monoisotopic Mass, Even Electron Ions

100 formula(e) evaluated with 1 results within limits (up to 50 closest results for each mass)

Elements Used:

C: 0-17 H: 0-50 N: 0-5 O: 0-3 S: 0-1 Cl: 0-1

200123\_5f 22 (0.240)

IITRPR

XEVO G2-XS QTOF

Test Name :

200123\_5f

1: TOF MS ES+

7.54e+006

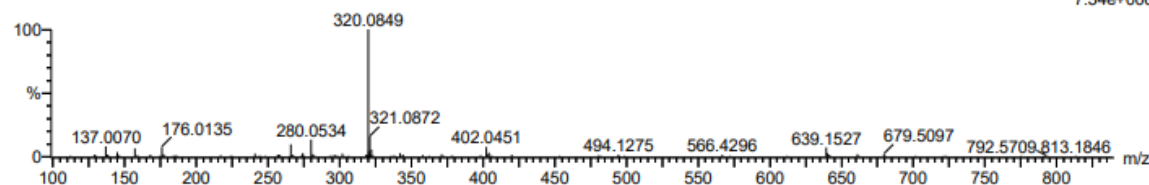

Minimum: -1.5  
Maximum: 5.0 10.0 50.0

| Mass     | Calc. Mass | mDa | PPM | DBE  | i-FIT | Norm | Conf (%) | Formula            |
|----------|------------|-----|-----|------|-------|------|----------|--------------------|
| 402.0451 | 402.0428   | 2.3 | 5.7 | 13.5 | 743.2 | n/a  | n/a      | C17 H13 N5 O3 S Cl |

Figure S110: HRMS of 5f

Single Mass Analysis

Tolerance = 5.0 mDa / DBE: min = -1.5, max = 50.0

Element prediction: Off

Number of isotope peaks used for i-FIT = 3

Monoisotopic Mass, Even Electron Ions

86 formula(e) evaluated with 1 results within limits (up to 50 closest results for each mass)

Elements Used:

C: 0-20 H: 0-50 N: 0-5 O: 0-6 S: 0-1

200123\_5y 24 (0.257)

IITRPR

XEVO G2-XS QTOF

Test Name :

200123\_5y

1: TOF MS ES+

1.94e+006

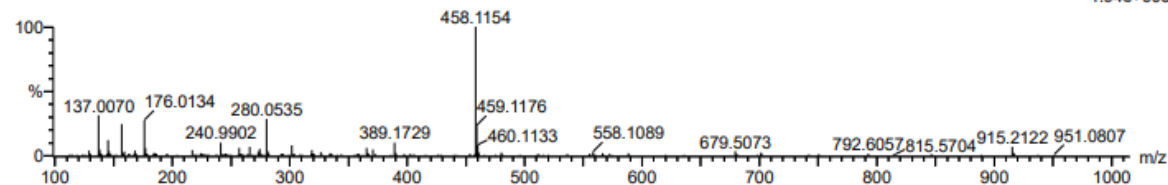

Minimum: -1.5  
Maximum: 5.0 10.0 50.0

| Mass     | Calc. Mass | mDa | PPM | DBE  | i-FIT | Norm | Conf (%) | Formula         |
|----------|------------|-----|-----|------|-------|------|----------|-----------------|
| 458.1154 | 458.1134   | 2.0 | 4.4 | 13.5 | 732.2 | n/a  | n/a      | C20 H20 N5 O6 S |

Figure S111: HRMS of 5y
